# Supplementary material
Source: publisher figshare collection journal article supplement (https://gsajournals.figshare.com/ndownloader/files/40289893)
Supplement: Supplementary file 1 [file 40289893]

## Sheet: Information
Information
A	Combination of hypodermal transcribed genes from alternative methods
B	Overlapping between genes bound by HPL-2 in the hypodermis and hypodermal transcribed genes
C	Combination of intestinal transcribed genes from alternative methods
D	Overlapping between genes bound by HPL-1 and HPL-2 in the intestine and intestinal transcribed genes

## Sheet: A
Combination of hypodermal transcribed genes from alternative methods used
RAPID|TaDa|PATseq	RAPID|TaDa|FACS	RAPID|PATseq|FACS	TaDa|PATseq|FACS	RAPID|TaDa|PATseq|FACS
WBGene00000399	WBGene00000004	WBGene00000074	WBGene00000040	WBGene00000041
WBGene00000402	WBGene00000225	WBGene00000112	WBGene00000064	WBGene00000080
WBGene00000594	WBGene00000233	WBGene00000122	WBGene00000101	WBGene00000083
WBGene00000618	WBGene00000246	WBGene00000292	WBGene00000105	WBGene00000100
WBGene00000625	WBGene00000265	WBGene00000379	WBGene00000109	WBGene00000107
WBGene00000631	WBGene00000420	WBGene00000383	WBGene00000110	WBGene00000114
WBGene00000634	WBGene00000548	WBGene00000509	WBGene00000117	WBGene00000115
WBGene00000655	WBGene00000995	WBGene00000526	WBGene00000123	WBGene00000146
WBGene00000665	WBGene00001068	WBGene00000556	WBGene00000142	WBGene00000149
WBGene00000685	WBGene00001233	WBGene00000585	WBGene00000151	WBGene00000161
WBGene00000691	WBGene00001368	WBGene00000601	WBGene00000156	WBGene00000175
WBGene00000702	WBGene00001478	WBGene00000602	WBGene00000163	WBGene00000221
WBGene00000743	WBGene00001497	WBGene00000726	WBGene00000170	WBGene00000223
WBGene00000746	WBGene00001515	WBGene00000761	WBGene00000176	WBGene00000229
WBGene00000753	WBGene00001615	WBGene00000787	WBGene00000183	WBGene00000240
WBGene00000795	WBGene00001674	WBGene00000837	WBGene00000197	WBGene00000253
WBGene00001063	WBGene00001768	WBGene00000880	WBGene00000207	WBGene00000254
WBGene00001064	WBGene00001774	WBGene00000984	WBGene00000231	WBGene00000256
WBGene00001065	WBGene00001898	WBGene00001005	WBGene00000249	WBGene00000273
WBGene00001069	WBGene00002100	WBGene00001016	WBGene00000251	WBGene00000282
WBGene00001555	WBGene00002214	WBGene00001018	WBGene00000252	WBGene00000293
WBGene00001690	WBGene00003089	WBGene00001179	WBGene00000276	WBGene00000298
WBGene00001730	WBGene00003603	WBGene00001229	WBGene00000369	WBGene00000366
WBGene00003057	WBGene00003616	WBGene00001240	WBGene00000371	WBGene00000377
WBGene00003186	WBGene00003630	WBGene00001325	WBGene00000376	WBGene00000381
WBGene00003675	WBGene00003709	WBGene00001453	WBGene00000380	WBGene00000407
WBGene00003731	WBGene00004023	WBGene00001514	WBGene00000382	WBGene00000421
WBGene00003844	WBGene00004038	WBGene00001516	WBGene00000425	WBGene00000528
WBGene00003862	WBGene00004225	WBGene00001682	WBGene00000441	WBGene00000542
WBGene00004004	WBGene00004226	WBGene00001683	WBGene00000443	WBGene00000552
WBGene00004216	WBGene00004279	WBGene00001784	WBGene00000475	WBGene00000599
WBGene00004218	WBGene00004310	WBGene00001854	WBGene00000479	WBGene00000603
WBGene00004219	WBGene00004412	WBGene00002048	WBGene00000502	WBGene00000606
WBGene00004228	WBGene00004414	WBGene00002192	WBGene00000508	WBGene00000616
WBGene00004232	WBGene00004415	WBGene00002215	WBGene00000534	WBGene00000626
WBGene00004359	WBGene00004416	WBGene00002990	WBGene00000547	WBGene00000647
WBGene00004395	WBGene00004417	WBGene00003053	WBGene00000550	WBGene00000649
WBGene00004998	WBGene00004418	WBGene00003083	WBGene00000608	WBGene00000656
WBGene00006732	WBGene00004419	WBGene00003084	WBGene00000609	WBGene00000657
WBGene00006955	WBGene00004420	WBGene00003130	WBGene00000615	WBGene00000667
WBGene00007299	WBGene00004421	WBGene00003148	WBGene00000636	WBGene00000668
WBGene00007343	WBGene00004422	WBGene00003172	WBGene00000639	WBGene00000669
WBGene00007479	WBGene00004423	WBGene00003253	WBGene00000653	WBGene00000672
WBGene00007546	WBGene00004424	WBGene00003372	WBGene00000678	WBGene00000673
WBGene00007560	WBGene00004425	WBGene00003517	WBGene00000683	WBGene00000677
WBGene00007804	WBGene00004426	WBGene00003593	WBGene00000693	WBGene00000680
WBGene00007988	WBGene00004427	WBGene00003618	WBGene00000698	WBGene00000681
WBGene00007989	WBGene00004428	WBGene00003661	WBGene00000703	WBGene00000696
WBGene00007996	WBGene00004429	WBGene00003691	WBGene00000711	WBGene00000699
WBGene00008260	WBGene00004430	WBGene00003727	WBGene00000713	WBGene00000707
WBGene00008496	WBGene00004431	WBGene00003746	WBGene00000728	WBGene00000712
WBGene00008512	WBGene00004432	WBGene00003765	WBGene00000735	WBGene00000715
WBGene00008605	WBGene00004434	WBGene00003767	WBGene00000748	WBGene00000717
WBGene00009013	WBGene00004436	WBGene00003768	WBGene00000751	WBGene00000718
WBGene00009133	WBGene00004437	WBGene00003865	WBGene00000767	WBGene00000722
WBGene00009261	WBGene00004444	WBGene00003950	WBGene00000776	WBGene00000732
WBGene00009528	WBGene00004445	WBGene00004033	WBGene00000788	WBGene00000733
WBGene00010630	WBGene00004446	WBGene00004043	WBGene00000800	WBGene00000739
WBGene00010673	WBGene00004447	WBGene00004108	WBGene00000843	WBGene00000740
WBGene00010723	WBGene00004449	WBGene00004182	WBGene00000854	WBGene00000742
WBGene00010760	WBGene00004450	WBGene00004204	WBGene00000882	WBGene00000754
WBGene00011339	WBGene00004452	WBGene00004321	WBGene00000897	WBGene00000802
WBGene00011530	WBGene00004456	WBGene00004326	WBGene00000900	WBGene00000831
WBGene00011777	WBGene00004470	WBGene00004369	WBGene00000908	WBGene00000833
WBGene00011895	WBGene00004471	WBGene00004387	WBGene00000914	WBGene00000871
WBGene00012540	WBGene00004472	WBGene00004462	WBGene00000941	WBGene00000876
WBGene00012796	WBGene00004473	WBGene00004826	WBGene00000962	WBGene00000879
WBGene00012917	WBGene00004474	WBGene00004929	WBGene00000975	WBGene00000881
WBGene00013385	WBGene00004475	WBGene00005008	WBGene00001029	WBGene00000883
WBGene00013523	WBGene00004477	WBGene00005648	WBGene00001031	WBGene00000887
WBGene00013717	WBGene00004480	WBGene00006331	WBGene00001032	WBGene00000894
WBGene00013883	WBGene00004482	WBGene00006450	WBGene00001034	WBGene00000898
WBGene00015059	WBGene00004483	WBGene00006493	WBGene00001039	WBGene00000901
WBGene00015335	WBGene00004485	WBGene00006504	WBGene00001042	WBGene00000912
WBGene00015646	WBGene00004487	WBGene00006514	WBGene00001047	WBGene00000915
WBGene00015795	WBGene00004488	WBGene00006588	WBGene00001059	WBGene00000928
WBGene00015841	WBGene00004493	WBGene00006594	WBGene00001067	WBGene00000938
WBGene00016013	WBGene00004494	WBGene00006601	WBGene00001081	WBGene00000963
WBGene00016421	WBGene00004495	WBGene00006638	WBGene00001086	WBGene00000976
WBGene00016740	WBGene00004499	WBGene00006649	WBGene00001088	WBGene00001006
WBGene00017396	WBGene00004704	WBGene00006660	WBGene00001089	WBGene00001008
WBGene00017560	WBGene00006543	WBGene00006704	WBGene00001093	WBGene00001023
WBGene00018039	WBGene00006565	WBGene00006794	WBGene00001094	WBGene00001030
WBGene00018515	WBGene00006611	WBGene00006839	WBGene00001130	WBGene00001038
WBGene00018985	WBGene00006656	WBGene00006862	WBGene00001137	WBGene00001066
WBGene00019113	WBGene00006678	WBGene00006916	WBGene00001160	WBGene00001070
WBGene00019236	WBGene00006706	WBGene00007013	WBGene00001178	WBGene00001072
WBGene00019290	WBGene00006721	WBGene00007189	WBGene00001182	WBGene00001073
WBGene00019382	WBGene00006722	WBGene00007256	WBGene00001208	WBGene00001074
WBGene00019908	WBGene00006831	WBGene00007288	WBGene00001225	WBGene00001077
WBGene00020039	WBGene00006964	WBGene00007395	WBGene00001228	WBGene00001080
WBGene00020626	WBGene00007064	WBGene00007529	WBGene00001234	WBGene00001131
WBGene00020912	WBGene00007180	WBGene00007587	WBGene00001262	WBGene00001134
WBGene00021134	WBGene00007287	WBGene00007592	WBGene00001336	WBGene00001149
WBGene00021343	WBGene00007444	WBGene00007601	WBGene00001340	WBGene00001159
WBGene00021389	WBGene00007488	WBGene00007630	WBGene00001358	WBGene00001163
WBGene00021415	WBGene00007548	WBGene00007882	WBGene00001387	WBGene00001167
WBGene00021690	WBGene00007680	WBGene00007890	WBGene00001395	WBGene00001168
WBGene00022012	WBGene00008094	WBGene00007913	WBGene00001411	WBGene00001169
WBGene00022554	WBGene00008320	WBGene00007927	WBGene00001430	WBGene00001173
WBGene00022613	WBGene00008331	WBGene00007975	WBGene00001441	WBGene00001177
WBGene00022816	WBGene00008669	WBGene00008052	WBGene00001488	WBGene00001184
WBGene00044109	WBGene00008714	WBGene00008100	WBGene00001491	WBGene00001194
WBGene00044344	WBGene00008848	WBGene00008132	WBGene00001496	WBGene00001196
WBGene00044612	WBGene00008927	WBGene00008183	WBGene00001498	WBGene00001209
WBGene00045183	WBGene00008997	WBGene00008195	WBGene00001501	WBGene00001226
WBGene00050943	WBGene00009002	WBGene00008196	WBGene00001503	WBGene00001227
WBGene00206373	WBGene00009057	WBGene00008197	WBGene00001520	WBGene00001239
	WBGene00009064	WBGene00008218	WBGene00001561	WBGene00001251
	WBGene00009452	WBGene00008332	WBGene00001574	WBGene00001303
	WBGene00009499	WBGene00008395	WBGene00001584	WBGene00001329
	WBGene00009722	WBGene00008412	WBGene00001596	WBGene00001330
	WBGene00009925	WBGene00008414	WBGene00001628	WBGene00001393
	WBGene00009944	WBGene00008514	WBGene00001633	WBGene00001396
	WBGene00010001	WBGene00008555	WBGene00001635	WBGene00001398
	WBGene00010012	WBGene00008601	WBGene00001645	WBGene00001405
	WBGene00010063	WBGene00008765	WBGene00001651	WBGene00001423
	WBGene00010080	WBGene00008780	WBGene00001694	WBGene00001428
	WBGene00010232	WBGene00008781	WBGene00001703	WBGene00001431
	WBGene00010433	WBGene00008856	WBGene00001714	WBGene00001443
	WBGene00010773	WBGene00008876	WBGene00001716	WBGene00001479
	WBGene00010776	WBGene00008886	WBGene00001747	WBGene00001493
	WBGene00010827	WBGene00008993	WBGene00001755	WBGene00001502
	WBGene00011088	WBGene00009243	WBGene00001824	WBGene00001510
	WBGene00011185	WBGene00009341	WBGene00001840	WBGene00001527
	WBGene00011239	WBGene00009380	WBGene00001972	WBGene00001558
	WBGene00011337	WBGene00009439	WBGene00001999	WBGene00001559
	WBGene00011348	WBGene00009626	WBGene00002038	WBGene00001562
	WBGene00011694	WBGene00009674	WBGene00002046	WBGene00001564
	WBGene00011738	WBGene00009726	WBGene00002059	WBGene00001565
	WBGene00011828	WBGene00009888	WBGene00002061	WBGene00001582
	WBGene00012007	WBGene00010018	WBGene00002066	WBGene00001592
	WBGene00012106	WBGene00010079	WBGene00002071	WBGene00001604
	WBGene00012152	WBGene00010115	WBGene00002081	WBGene00001631
	WBGene00012330	WBGene00010117	WBGene00002083	WBGene00001649
	WBGene00012472	WBGene00010224	WBGene00002152	WBGene00001684
	WBGene00013007	WBGene00010251	WBGene00002162	WBGene00001685
	WBGene00013260	WBGene00010356	WBGene00002191	WBGene00001713
	WBGene00013266	WBGene00010409	WBGene00002196	WBGene00001725
	WBGene00013418	WBGene00010525	WBGene00002201	WBGene00001744
	WBGene00013438	WBGene00010730	WBGene00002202	WBGene00001748
	WBGene00013499	WBGene00010731	WBGene00002203	WBGene00001843
	WBGene00013650	WBGene00010766	WBGene00002207	WBGene00001851
	WBGene00013920	WBGene00010770	WBGene00002223	WBGene00001955
	WBGene00013923	WBGene00010778	WBGene00002238	WBGene00001993
	WBGene00014051	WBGene00011003	WBGene00002250	WBGene00001994
	WBGene00014093	WBGene00011015	WBGene00002266	WBGene00002000
	WBGene00015021	WBGene00011071	WBGene00002295	WBGene00002005
	WBGene00015138	WBGene00011292	WBGene00002335	WBGene00002007
	WBGene00015647	WBGene00011415	WBGene00002344	WBGene00002008
	WBGene00016093	WBGene00011451	WBGene00002632	WBGene00002010
	WBGene00016095	WBGene00011527	WBGene00002637	WBGene00002024
	WBGene00016148	WBGene00011540	WBGene00002783	WBGene00002025
	WBGene00016644	WBGene00011735	WBGene00002981	WBGene00002037
	WBGene00016981	WBGene00011756	WBGene00003002	WBGene00002045
	WBGene00017123	WBGene00011814	WBGene00003003	WBGene00002053
	WBGene00017272	WBGene00011832	WBGene00003014	WBGene00002065
	WBGene00017301	WBGene00011885	WBGene00003025	WBGene00002070
	WBGene00018015	WBGene00011953	WBGene00003026	WBGene00002074
	WBGene00018302	WBGene00012004	WBGene00003030	WBGene00002077
	WBGene00018566	WBGene00012005	WBGene00003048	WBGene00002078
	WBGene00018738	WBGene00012337	WBGene00003052	WBGene00002080
	WBGene00018786	WBGene00012347	WBGene00003059	WBGene00002127
	WBGene00018996	WBGene00012348	WBGene00003061	WBGene00002134
	WBGene00019380	WBGene00012351	WBGene00003064	WBGene00002135
	WBGene00019825	WBGene00012358	WBGene00003068	WBGene00002163
	WBGene00019841	WBGene00012440	WBGene00003072	WBGene00002189
	WBGene00019871	WBGene00012484	WBGene00003073	WBGene00002258
	WBGene00019961	WBGene00012978	WBGene00003082	WBGene00002262
	WBGene00019979	WBGene00013008	WBGene00003085	WBGene00002264
	WBGene00020300	WBGene00013146	WBGene00003086	WBGene00002265
	WBGene00020346	WBGene00013217	WBGene00003234	WBGene00002363
	WBGene00020566	WBGene00013543	WBGene00003378	WBGene00002717
	WBGene00020919	WBGene00013577	WBGene00003388	WBGene00002845
	WBGene00020947	WBGene00013639	WBGene00003391	WBGene00002879
	WBGene00021047	WBGene00013688	WBGene00003516	WBGene00002889
	WBGene00021080	WBGene00014001	WBGene00003530	WBGene00002891
	WBGene00022129	WBGene00014075	WBGene00003553	WBGene00002915
	WBGene00022788	WBGene00014092	WBGene00003554	WBGene00003009
	WBGene00044767	WBGene00014171	WBGene00003559	WBGene00003012
	WBGene00044789	WBGene00014262	WBGene00003564	WBGene00003034
	WBGene00045488	WBGene00015008	WBGene00003566	WBGene00003040
	WBGene00013458	WBGene00015141	WBGene00003586	WBGene00003044
		WBGene00015208	WBGene00003596	WBGene00003055
		WBGene00015235	WBGene00003619	WBGene00003063
		WBGene00015291	WBGene00003623	WBGene00003071
		WBGene00015430	WBGene00003628	WBGene00003112
		WBGene00015484	WBGene00003635	WBGene00003124
		WBGene00015508	WBGene00003639	WBGene00003132
		WBGene00015684	WBGene00003659	WBGene00003144
		WBGene00015759	WBGene00003678	WBGene00003151
		WBGene00015769	WBGene00003695	WBGene00003161
		WBGene00015866	WBGene00003762	WBGene00003162
		WBGene00015887	WBGene00003773	WBGene00003163
		WBGene00015896	WBGene00003789	WBGene00003178
		WBGene00015919	WBGene00003796	WBGene00003214
		WBGene00015926	WBGene00003825	WBGene00003218
		WBGene00016020	WBGene00003827	WBGene00003367
		WBGene00016119	WBGene00003830	WBGene00003400
		WBGene00016269	WBGene00003904	WBGene00003476
		WBGene00016292	WBGene00003911	WBGene00003482
		WBGene00016325	WBGene00003914	WBGene00003485
		WBGene00016331	WBGene00003920	WBGene00003497
		WBGene00016408	WBGene00003929	WBGene00003511
		WBGene00016500	WBGene00003947	WBGene00003528
		WBGene00016507	WBGene00003949	WBGene00003588
		WBGene00016508	WBGene00003953	WBGene00003598
		WBGene00016535	WBGene00003961	WBGene00003600
		WBGene00016576	WBGene00003982	WBGene00003610
		WBGene00016611	WBGene00004015	WBGene00003613
		WBGene00016645	WBGene00004025	WBGene00003622
		WBGene00016655	WBGene00004034	WBGene00003625
		WBGene00016659	WBGene00004040	WBGene00003633
		WBGene00016661	WBGene00004053	WBGene00003636
		WBGene00016671	WBGene00004075	WBGene00003638
		WBGene00016728	WBGene00004076	WBGene00003656
		WBGene00016741	WBGene00004077	WBGene00003658
		WBGene00016894	WBGene00004091	WBGene00003681
		WBGene00016992	WBGene00004124	WBGene00003687
		WBGene00017023	WBGene00004134	WBGene00003704
		WBGene00017283	WBGene00004136	WBGene00003728
		WBGene00017293	WBGene00004147	WBGene00003736
		WBGene00017302	WBGene00004152	WBGene00003771
		WBGene00017390	WBGene00004167	WBGene00003776
		WBGene00017582	WBGene00004187	WBGene00003785
		WBGene00017735	WBGene00004205	WBGene00003793
		WBGene00017757	WBGene00004208	WBGene00003795
		WBGene00017770	WBGene00004230	WBGene00003818
		WBGene00017834	WBGene00004235	WBGene00003821
		WBGene00017885	WBGene00004254	WBGene00003822
		WBGene00017954	WBGene00004259	WBGene00003831
		WBGene00017982	WBGene00004271	WBGene00003847
		WBGene00018006	WBGene00004274	WBGene00003858
		WBGene00018131	WBGene00004304	WBGene00003887
		WBGene00018267	WBGene00004306	WBGene00003891
		WBGene00018349	WBGene00004311	WBGene00003902
		WBGene00018395	WBGene00004339	WBGene00003903
		WBGene00018400	WBGene00004371	WBGene00003915
		WBGene00018532	WBGene00004373	WBGene00003916
		WBGene00018657	WBGene00004459	WBGene00003918
		WBGene00018702	WBGene00004463	WBGene00003928
		WBGene00018710	WBGene00004467	WBGene00003936
		WBGene00018719	WBGene00004501	WBGene00003951
		WBGene00018739	WBGene00004502	WBGene00003962
		WBGene00018764	WBGene00004503	WBGene00003963
		WBGene00018804	WBGene00004504	WBGene00003964
		WBGene00018847	WBGene00004682	WBGene00003968
		WBGene00018974	WBGene00004698	WBGene00004014
		WBGene00019102	WBGene00004701	WBGene00004095
		WBGene00019111	WBGene00004703	WBGene00004109
		WBGene00019185	WBGene00004738	WBGene00004110
		WBGene00019211	WBGene00004739	WBGene00004120
		WBGene00019294	WBGene00004756	WBGene00004131
		WBGene00019298	WBGene00004759	WBGene00004132
		WBGene00019317	WBGene00004767	WBGene00004143
		WBGene00019457	WBGene00004773	WBGene00004164
		WBGene00019487	WBGene00004788	WBGene00004172
		WBGene00019509	WBGene00004804	WBGene00004175
		WBGene00019693	WBGene00004807	WBGene00004183
		WBGene00019697	WBGene00004829	WBGene00004189
		WBGene00019719	WBGene00004855	WBGene00004210
		WBGene00019726	WBGene00004858	WBGene00004217
		WBGene00019780	WBGene00004884	WBGene00004222
		WBGene00019827	WBGene00004889	WBGene00004227
		WBGene00019831	WBGene00004897	WBGene00004237
		WBGene00019946	WBGene00004946	WBGene00004245
		WBGene00020112	WBGene00004951	WBGene00004256
		WBGene00020181	WBGene00005009	WBGene00004258
		WBGene00020339	WBGene00005015	WBGene00004264
		WBGene00020446	WBGene00005019	WBGene00004272
		WBGene00020497	WBGene00005021	WBGene00004300
		WBGene00020604	WBGene00005022	WBGene00004313
		WBGene00020636	WBGene00005023	WBGene00004336
		WBGene00020658	WBGene00006307	WBGene00004358
		WBGene00020693	WBGene00006364	WBGene00004397
		WBGene00020781	WBGene00006367	WBGene00004398
		WBGene00020917	WBGene00006392	WBGene00004408
		WBGene00020931	WBGene00006410	WBGene00004409
		WBGene00020948	WBGene00006414	WBGene00004410
		WBGene00020949	WBGene00006423	WBGene00004458
		WBGene00020951	WBGene00006432	WBGene00004464
		WBGene00020957	WBGene00006434	WBGene00004465
		WBGene00021043	WBGene00006437	WBGene00004469
		WBGene00021079	WBGene00006438	WBGene00004736
		WBGene00021149	WBGene00006446	WBGene00004751
		WBGene00021156	WBGene00006465	WBGene00004755
		WBGene00021170	WBGene00006467	WBGene00004760
		WBGene00021248	WBGene00006474	WBGene00004768
		WBGene00021292	WBGene00006476	WBGene00004783
		WBGene00021460	WBGene00006494	WBGene00004859
		WBGene00021562	WBGene00006497	WBGene00004862
		WBGene00021646	WBGene00006530	WBGene00004900
		WBGene00021845	WBGene00006568	WBGene00004902
		WBGene00021863	WBGene00006574	WBGene00004911
		WBGene00021890	WBGene00006575	WBGene00004930
		WBGene00021909	WBGene00006579	WBGene00004945
		WBGene00022059	WBGene00006606	WBGene00004947
		WBGene00022125	WBGene00006617	WBGene00004980
		WBGene00022127	WBGene00006640	WBGene00005016
		WBGene00022386	WBGene00006708	WBGene00005018
		WBGene00022532	WBGene00006713	WBGene00005663
		WBGene00022580	WBGene00006720	WBGene00006066
		WBGene00022583	WBGene00006728	WBGene00006220
		WBGene00022749	WBGene00006733	WBGene00006342
		WBGene00022750	WBGene00006734	WBGene00006352
		WBGene00022855	WBGene00006760	WBGene00006353
		WBGene00023418	WBGene00006768	WBGene00006366
		WBGene00044191	WBGene00006780	WBGene00006369
		WBGene00044326	WBGene00006791	WBGene00006373
		WBGene00044636	WBGene00006796	WBGene00006407
		WBGene00045272	WBGene00006817	WBGene00006439
		WBGene00045418	WBGene00006870	WBGene00006444
		WBGene00045475	WBGene00006888	WBGene00006462
		WBGene00077690	WBGene00006912	WBGene00006472
			WBGene00006913	WBGene00006483
			WBGene00006918	WBGene00006518
			WBGene00006947	WBGene00006523
			WBGene00006975	WBGene00006528
			WBGene00006997	WBGene00006529
			WBGene00007000	WBGene00006536
			WBGene00007009	WBGene00006537
			WBGene00007024	WBGene00006591
			WBGene00007042	WBGene00006592
			WBGene00007048	WBGene00006593
			WBGene00007099	WBGene00006595
			WBGene00007110	WBGene00006599
			WBGene00007135	WBGene00006603
			WBGene00007195	WBGene00006626
			WBGene00007223	WBGene00006686
			WBGene00007257	WBGene00006699
			WBGene00007350	WBGene00006702
			WBGene00007355	WBGene00006725
			WBGene00007385	WBGene00006727
			WBGene00007402	WBGene00006739
			WBGene00007428	WBGene00006769
			WBGene00007505	WBGene00006771
			WBGene00007520	WBGene00006773
			WBGene00007534	WBGene00006779
			WBGene00007549	WBGene00006786
			WBGene00007553	WBGene00006787
			WBGene00007555	WBGene00006803
			WBGene00007588	WBGene00006815
			WBGene00007646	WBGene00006833
			WBGene00007696	WBGene00006840
			WBGene00007698	WBGene00006861
			WBGene00007746	WBGene00006876
			WBGene00007812	WBGene00006882
			WBGene00007898	WBGene00006890
			WBGene00007926	WBGene00006910
			WBGene00007969	WBGene00006911
			WBGene00008000	WBGene00006914
			WBGene00008006	WBGene00006917
			WBGene00008019	WBGene00006919
			WBGene00008053	WBGene00006920
			WBGene00008136	WBGene00006921
			WBGene00008211	WBGene00006923
			WBGene00008225	WBGene00006924
			WBGene00008266	WBGene00006934
			WBGene00008274	WBGene00006941
			WBGene00008363	WBGene00006950
			WBGene00008411	WBGene00006956
			WBGene00008430	WBGene00006959
			WBGene00008448	WBGene00006996
			WBGene00008480	WBGene00007012
			WBGene00008532	WBGene00007016
			WBGene00008666	WBGene00007030
			WBGene00008682	WBGene00007053
			WBGene00008684	WBGene00007058
			WBGene00008685	WBGene00007071
			WBGene00008686	WBGene00007137
			WBGene00008711	WBGene00007142
			WBGene00008748	WBGene00007143
			WBGene00008764	WBGene00007150
			WBGene00008800	WBGene00007178
			WBGene00008832	WBGene00007227
			WBGene00008851	WBGene00007264
			WBGene00008852	WBGene00007270
			WBGene00008859	WBGene00007275
			WBGene00008922	WBGene00007352
			WBGene00008948	WBGene00007365
			WBGene00008956	WBGene00007384
			WBGene00008987	WBGene00007409
			WBGene00008999	WBGene00007449
			WBGene00009084	WBGene00007463
			WBGene00009094	WBGene00007474
			WBGene00009098	WBGene00007492
			WBGene00009120	WBGene00007514
			WBGene00009121	WBGene00007545
			WBGene00009122	WBGene00007586
			WBGene00009141	WBGene00007651
			WBGene00009142	WBGene00007679
			WBGene00009164	WBGene00007736
			WBGene00009187	WBGene00007779
			WBGene00009241	WBGene00007836
			WBGene00009245	WBGene00007841
			WBGene00009262	WBGene00007848
			WBGene00009264	WBGene00007877
			WBGene00009284	WBGene00007903
			WBGene00009311	WBGene00007934
			WBGene00009454	WBGene00007947
			WBGene00009460	WBGene00007999
			WBGene00009477	WBGene00008032
			WBGene00009498	WBGene00008089
			WBGene00009508	WBGene00008117
			WBGene00009559	WBGene00008205
			WBGene00009561	WBGene00008215
			WBGene00009574	WBGene00008224
			WBGene00009583	WBGene00008233
			WBGene00009594	WBGene00008270
			WBGene00009660	WBGene00008362
			WBGene00009740	WBGene00008404
			WBGene00009770	WBGene00008419
			WBGene00009771	WBGene00008505
			WBGene00009785	WBGene00008506
			WBGene00009793	WBGene00008521
			WBGene00009797	WBGene00008549
			WBGene00009809	WBGene00008622
			WBGene00009818	WBGene00008652
			WBGene00009880	WBGene00008664
			WBGene00009882	WBGene00008683
			WBGene00009915	WBGene00008688
			WBGene00009930	WBGene00008707
			WBGene00009952	WBGene00008743
			WBGene00009978	WBGene00008803
			WBGene00009983	WBGene00008857
			WBGene00009987	WBGene00008920
			WBGene00009993	WBGene00008926
			WBGene00009996	WBGene00008940
			WBGene00010035	WBGene00008964
			WBGene00010055	WBGene00008975
			WBGene00010111	WBGene00009050
			WBGene00010199	WBGene00009081
			WBGene00010225	WBGene00009082
			WBGene00010262	WBGene00009112
			WBGene00010280	WBGene00009119
			WBGene00010284	WBGene00009126
			WBGene00010303	WBGene00009158
			WBGene00010321	WBGene00009177
			WBGene00010333	WBGene00009218
			WBGene00010337	WBGene00009306
			WBGene00010407	WBGene00009334
			WBGene00010449	WBGene00009340
			WBGene00010453	WBGene00009342
			WBGene00010470	WBGene00009349
			WBGene00010476	WBGene00009367
			WBGene00010479	WBGene00009405
			WBGene00010480	WBGene00009450
			WBGene00010550	WBGene00009453
			WBGene00010557	WBGene00009482
			WBGene00010560	WBGene00009532
			WBGene00010579	WBGene00009542
			WBGene00010595	WBGene00009552
			WBGene00010629	WBGene00009584
			WBGene00010631	WBGene00009587
			WBGene00010639	WBGene00009621
			WBGene00010640	WBGene00009628
			WBGene00010641	WBGene00009661
			WBGene00010681	WBGene00009678
			WBGene00010699	WBGene00009712
			WBGene00010736	WBGene00009717
			WBGene00010740	WBGene00009723
			WBGene00010780	WBGene00009724
			WBGene00010785	WBGene00009772
			WBGene00010790	WBGene00009783
			WBGene00010796	WBGene00009787
			WBGene00010828	WBGene00009812
			WBGene00010840	WBGene00009813
			WBGene00010878	WBGene00009829
			WBGene00010882	WBGene00009918
			WBGene00010943	WBGene00009926
			WBGene00010945	WBGene00009947
			WBGene00010993	WBGene00009980
			WBGene00011033	WBGene00009982
			WBGene00011036	WBGene00010037
			WBGene00011050	WBGene00010052
			WBGene00011105	WBGene00010135
			WBGene00011111	WBGene00010221
			WBGene00011122	WBGene00010260
			WBGene00011227	WBGene00010279
			WBGene00011240	WBGene00010291
			WBGene00011259	WBGene00010317
			WBGene00011298	WBGene00010326
			WBGene00011311	WBGene00010419
			WBGene00011312	WBGene00010425
			WBGene00011333	WBGene00010454
			WBGene00011408	WBGene00010456
			WBGene00011409	WBGene00010478
			WBGene00011488	WBGene00010502
			WBGene00011501	WBGene00010503
			WBGene00011526	WBGene00010556
			WBGene00011528	WBGene00010621
			WBGene00011538	WBGene00010627
			WBGene00011564	WBGene00010661
			WBGene00011580	WBGene00010664
			WBGene00011629	WBGene00010665
			WBGene00011639	WBGene00010667
			WBGene00011696	WBGene00010677
			WBGene00011713	WBGene00010697
			WBGene00011802	WBGene00010700
			WBGene00011815	WBGene00010755
			WBGene00011833	WBGene00010759
			WBGene00011835	WBGene00010809
			WBGene00011887	WBGene00010834
			WBGene00011890	WBGene00010867
			WBGene00011932	WBGene00010868
			WBGene00011962	WBGene00010889
			WBGene00011965	WBGene00010941
			WBGene00011970	WBGene00010988
			WBGene00011971	WBGene00011042
			WBGene00011978	WBGene00011059
			WBGene00011985	WBGene00011110
			WBGene00011994	WBGene00011116
			WBGene00012031	WBGene00011128
			WBGene00012094	WBGene00011146
			WBGene00012097	WBGene00011230
			WBGene00012121	WBGene00011232
			WBGene00012123	WBGene00011235
			WBGene00012136	WBGene00011263
			WBGene00012144	WBGene00011273
			WBGene00012148	WBGene00011278
			WBGene00012167	WBGene00011300
			WBGene00012179	WBGene00011304
			WBGene00012184	WBGene00011393
			WBGene00012193	WBGene00011398
			WBGene00012194	WBGene00011404
			WBGene00012203	WBGene00011436
			WBGene00012230	WBGene00011480
			WBGene00012243	WBGene00011481
			WBGene00012245	WBGene00011522
			WBGene00012339	WBGene00011529
			WBGene00012344	WBGene00011662
			WBGene00012354	WBGene00011679
			WBGene00012359	WBGene00011729
			WBGene00012360	WBGene00011737
			WBGene00012444	WBGene00011760
			WBGene00012497	WBGene00011763
			WBGene00012538	WBGene00011768
			WBGene00012591	WBGene00011773
			WBGene00012608	WBGene00011775
			WBGene00012704	WBGene00011820
			WBGene00012803	WBGene00011831
			WBGene00012829	WBGene00011849
			WBGene00012869	WBGene00011850
			WBGene00012896	WBGene00011867
			WBGene00012903	WBGene00011883
			WBGene00012929	WBGene00011884
			WBGene00012943	WBGene00011891
			WBGene00013103	WBGene00011977
			WBGene00013127	WBGene00012033
			WBGene00013143	WBGene00012085
			WBGene00013203	WBGene00012107
			WBGene00013219	WBGene00012118
			WBGene00013236	WBGene00012149
			WBGene00013263	WBGene00012186
			WBGene00013379	WBGene00012256
			WBGene00013497	WBGene00012261
			WBGene00013597	WBGene00012317
			WBGene00013734	WBGene00012343
			WBGene00013892	WBGene00012376
			WBGene00013895	WBGene00012443
			WBGene00014000	WBGene00012463
			WBGene00014013	WBGene00012471
			WBGene00014016	WBGene00012546
			WBGene00014096	WBGene00012553
			WBGene00014109	WBGene00012717
			WBGene00014111	WBGene00012762
			WBGene00014151	WBGene00012768
			WBGene00014164	WBGene00012769
			WBGene00014165	WBGene00012999
			WBGene00014219	WBGene00013025
			WBGene00014244	WBGene00013034
			WBGene00015074	WBGene00013106
			WBGene00015125	WBGene00013139
			WBGene00015155	WBGene00013311
			WBGene00015164	WBGene00013352
			WBGene00015168	WBGene00013461
			WBGene00015172	WBGene00013462
			WBGene00015197	WBGene00013463
			WBGene00015298	WBGene00013489
			WBGene00015329	WBGene00013560
			WBGene00015330	WBGene00013575
			WBGene00015344	WBGene00013578
			WBGene00015349	WBGene00013591
			WBGene00015391	WBGene00013672
			WBGene00015418	WBGene00013709
			WBGene00015460	WBGene00013736
			WBGene00015463	WBGene00013766
			WBGene00015481	WBGene00013859
			WBGene00015485	WBGene00013866
			WBGene00015660	WBGene00013878
			WBGene00015703	WBGene00013924
			WBGene00015734	WBGene00013926
			WBGene00015778	WBGene00013969
			WBGene00015791	WBGene00013985
			WBGene00015794	WBGene00014012
			WBGene00015810	WBGene00014025
			WBGene00015811	WBGene00014058
			WBGene00015813	WBGene00014095
			WBGene00015814	WBGene00014098
			WBGene00015920	WBGene00014115
			WBGene00015941	WBGene00014148
			WBGene00016002	WBGene00014172
			WBGene00016015	WBGene00014173
			WBGene00016019	WBGene00014202
			WBGene00016045	WBGene00014300
			WBGene00016059	WBGene00015002
			WBGene00016140	WBGene00015007
			WBGene00016146	WBGene00015046
			WBGene00016167	WBGene00015056
			WBGene00016170	WBGene00015064
			WBGene00016173	WBGene00015143
			WBGene00016200	WBGene00015156
			WBGene00016235	WBGene00015163
			WBGene00016250	WBGene00015207
			WBGene00016258	WBGene00015285
			WBGene00016261	WBGene00015294
			WBGene00016310	WBGene00015332
			WBGene00016318	WBGene00015410
			WBGene00016326	WBGene00015464
			WBGene00016354	WBGene00015512
			WBGene00016405	WBGene00015514
			WBGene00016439	WBGene00015545
			WBGene00016452	WBGene00015547
			WBGene00016489	WBGene00015676
			WBGene00016494	WBGene00015802
			WBGene00016716	WBGene00015809
			WBGene00016735	WBGene00015943
			WBGene00016803	WBGene00016006
			WBGene00016955	WBGene00016011
			WBGene00016989	WBGene00016018
			WBGene00016995	WBGene00016103
			WBGene00017004	WBGene00016133
			WBGene00017075	WBGene00016195
			WBGene00017119	WBGene00016201
			WBGene00017163	WBGene00016264
			WBGene00017244	WBGene00016355
			WBGene00017274	WBGene00016415
			WBGene00017311	WBGene00016417
			WBGene00017372	WBGene00016419
			WBGene00017419	WBGene00016422
			WBGene00017431	WBGene00016493
			WBGene00017480	WBGene00016495
			WBGene00017563	WBGene00016496
			WBGene00017571	WBGene00016499
			WBGene00017606	WBGene00016505
			WBGene00017648	WBGene00016509
			WBGene00017717	WBGene00016596
			WBGene00017759	WBGene00016630
			WBGene00017760	WBGene00016653
			WBGene00017773	WBGene00016739
			WBGene00017785	WBGene00016749
			WBGene00017786	WBGene00016750
			WBGene00017816	WBGene00016790
			WBGene00017852	WBGene00016794
			WBGene00017855	WBGene00016907
			WBGene00017891	WBGene00016987
			WBGene00017920	WBGene00016997
			WBGene00017928	WBGene00017012
			WBGene00017964	WBGene00017088
			WBGene00017970	WBGene00017121
			WBGene00018008	WBGene00017125
			WBGene00018051	WBGene00017126
			WBGene00018132	WBGene00017166
			WBGene00018151	WBGene00017217
			WBGene00018152	WBGene00017220
			WBGene00018208	WBGene00017262
			WBGene00018218	WBGene00017385
			WBGene00018250	WBGene00017430
			WBGene00018285	WBGene00017438
			WBGene00018316	WBGene00017463
			WBGene00018341	WBGene00017483
			WBGene00018421	WBGene00017506
			WBGene00018426	WBGene00017565
			WBGene00018475	WBGene00017569
			WBGene00018491	WBGene00017698
			WBGene00018509	WBGene00017765
			WBGene00018510	WBGene00017772
			WBGene00018522	WBGene00017789
			WBGene00018533	WBGene00017838
			WBGene00018562	WBGene00017841
			WBGene00018572	WBGene00017864
			WBGene00018682	WBGene00017904
			WBGene00018697	WBGene00017923
			WBGene00018701	WBGene00017968
			WBGene00018734	WBGene00017979
			WBGene00018756	WBGene00017991
			WBGene00018849	WBGene00017998
			WBGene00018967	WBGene00018014
			WBGene00018986	WBGene00018031
			WBGene00019001	WBGene00018073
			WBGene00019061	WBGene00018144
			WBGene00019118	WBGene00018145
			WBGene00019162	WBGene00018268
			WBGene00019212	WBGene00018282
			WBGene00019250	WBGene00018293
			WBGene00019272	WBGene00018294
			WBGene00019296	WBGene00018297
			WBGene00019301	WBGene00018321
			WBGene00019305	WBGene00018330
			WBGene00019334	WBGene00018339
			WBGene00019504	WBGene00018403
			WBGene00019521	WBGene00018418
			WBGene00019620	WBGene00018482
			WBGene00019628	WBGene00018487
			WBGene00019678	WBGene00018488
			WBGene00019680	WBGene00018518
			WBGene00019686	WBGene00018586
			WBGene00019748	WBGene00018700
			WBGene00019816	WBGene00018744
			WBGene00019877	WBGene00018802
			WBGene00019890	WBGene00018811
			WBGene00019893	WBGene00018846
			WBGene00019940	WBGene00018869
			WBGene00019953	WBGene00018953
			WBGene00019960	WBGene00018969
			WBGene00019983	WBGene00018990
			WBGene00020022	WBGene00019007
			WBGene00020033	WBGene00019074
			WBGene00020038	WBGene00019122
			WBGene00020047	WBGene00019148
			WBGene00020102	WBGene00019204
			WBGene00020107	WBGene00019249
			WBGene00020148	WBGene00019268
			WBGene00020184	WBGene00019300
			WBGene00020185	WBGene00019304
			WBGene00020216	WBGene00019322
			WBGene00020245	WBGene00019327
			WBGene00020297	WBGene00019464
			WBGene00020301	WBGene00019465
			WBGene00020398	WBGene00019466
			WBGene00020423	WBGene00019489
			WBGene00020441	WBGene00019490
			WBGene00020464	WBGene00019492
			WBGene00020481	WBGene00019510
			WBGene00020496	WBGene00019537
			WBGene00020551	WBGene00019540
			WBGene00020553	WBGene00019572
			WBGene00020554	WBGene00019656
			WBGene00020592	WBGene00019760
			WBGene00020628	WBGene00019819
			WBGene00020649	WBGene00019855
			WBGene00020679	WBGene00019875
			WBGene00020683	WBGene00019895
			WBGene00020721	WBGene00019900
			WBGene00020762	WBGene00019947
			WBGene00020770	WBGene00020007
			WBGene00020801	WBGene00020031
			WBGene00020806	WBGene00020092
			WBGene00020821	WBGene00020097
			WBGene00020823	WBGene00020131
			WBGene00020868	WBGene00020139
			WBGene00020911	WBGene00020160
			WBGene00020936	WBGene00020169
			WBGene00021296	WBGene00020219
			WBGene00021326	WBGene00020269
			WBGene00021391	WBGene00020274
			WBGene00021466	WBGene00020275
			WBGene00021468	WBGene00020284
			WBGene00021470	WBGene00020315
			WBGene00021532	WBGene00020335
			WBGene00021628	WBGene00020347
			WBGene00021685	WBGene00020348
			WBGene00021692	WBGene00020366
			WBGene00021732	WBGene00020391
			WBGene00021834	WBGene00020425
			WBGene00021888	WBGene00020507
			WBGene00021899	WBGene00020530
			WBGene00021912	WBGene00020556
			WBGene00021956	WBGene00020696
			WBGene00021986	WBGene00020824
			WBGene00022037	WBGene00020827
			WBGene00022069	WBGene00020831
			WBGene00022131	WBGene00020846
			WBGene00022169	WBGene00020865
			WBGene00022170	WBGene00020891
			WBGene00022199	WBGene00020915
			WBGene00022235	WBGene00020930
			WBGene00022245	WBGene00020937
			WBGene00022279	WBGene00020950
			WBGene00022456	WBGene00020952
			WBGene00022500	WBGene00021068
			WBGene00022631	WBGene00021088
			WBGene00022643	WBGene00021095
			WBGene00022680	WBGene00021128
			WBGene00022703	WBGene00021281
			WBGene00022712	WBGene00021348
			WBGene00022718	WBGene00021350
			WBGene00022748	WBGene00021352
			WBGene00022783	WBGene00021369
			WBGene00022787	WBGene00021420
			WBGene00022793	WBGene00021427
			WBGene00022794	WBGene00021430
			WBGene00022814	WBGene00021469
			WBGene00022852	WBGene00021486
			WBGene00022880	WBGene00021533
			WBGene00022882	WBGene00021535
			WBGene00044026	WBGene00021561
			WBGene00044069	WBGene00021597
			WBGene00044071	WBGene00021645
			WBGene00044077	WBGene00021835
			WBGene00044324	WBGene00021883
			WBGene00044396	WBGene00021960
			WBGene00044483	WBGene00021975
			WBGene00044553	WBGene00022010
			WBGene00044779	WBGene00022033
			WBGene00044989	WBGene00022042
			WBGene00045419	WBGene00022089
			WBGene00077526	WBGene00022103
			WBGene00077697	WBGene00022114
			WBGene00077761	WBGene00022119
			WBGene00175030	WBGene00022122
			WBGene00195248	WBGene00022139
				WBGene00022158
				WBGene00022160
				WBGene00022231
				WBGene00022233
				WBGene00022307
				WBGene00022336
				WBGene00022358
				WBGene00022517
				WBGene00022538
				WBGene00022599
				WBGene00022678
				WBGene00022679
				WBGene00022683
				WBGene00022722
				WBGene00022743
				WBGene00022766
				WBGene00022781
				WBGene00022797
				WBGene00022800
				WBGene00022817
				WBGene00022850
				WBGene00022856
				WBGene00022861
				WBGene00023500
				WBGene00044019
				WBGene00044061
				WBGene00044294
				WBGene00045399
				WBGene00077693
				WBGene00185014
				WBGene00219376
				WBGene00235102
				WBGene00017984
				WBGene00015470
				WBGene00010896

## Sheet: B
Intersection between genes bound by HPL-2 in hypodermis with hypodermal genes transcribed
[Hypodermal_data]	[HPL-2 hyp]	[Hypodermal_data] and [HPL-2 hyp]
WBGene00000399	WBGene00013228	WBGene00021690
WBGene00000402	WBGene00013563	WBGene00003709
WBGene00000594	WBGene00001946	WBGene00004226
WBGene00000618	WBGene00013732	WBGene00007064
WBGene00000625	WBGene00013735	WBGene00007680
WBGene00000631	WBGene00013741	WBGene00009064
WBGene00000634	WBGene00012544	WBGene00012106
WBGene00000655	WBGene00003406	WBGene00013266
WBGene00000665	WBGene00012552	WBGene00013418
WBGene00000685	WBGene00014179	WBGene00018786
WBGene00000691	WBGene00012721	WBGene00021080
WBGene00000702	WBGene00012806	WBGene00022129
WBGene00000743	WBGene00011399	WBGene00006588
WBGene00000746	WBGene00009730	WBGene00006601
WBGene00000753	WBGene00006612	WBGene00010731
WBGene00000795	WBGene00011736	WBGene00011003
WBGene00001063	WBGene00010662	WBGene00011735
WBGene00001064	WBGene00021395	WBGene00016269
WBGene00001065	WBGene00022048	WBGene00016576
WBGene00001069	WBGene00000213	WBGene00021043
WBGene00001555	WBGene00000676	WBGene00021079
WBGene00001690	WBGene00021948	WBGene00022386
WBGene00001730	WBGene00021939	WBGene00000788
WBGene00003057	WBGene00021938	WBGene00000900
WBGene00003186	WBGene00019070	WBGene00001178
WBGene00003675	WBGene00019067	WBGene00001488
WBGene00003731	WBGene00021931	WBGene00001561
WBGene00003844	WBGene00016636	WBGene00001747
WBGene00003862	WBGene00022427	WBGene00003086
WBGene00004004	WBGene00009518	WBGene00003516
WBGene00004216	WBGene00019368	WBGene00008448
WBGene00004218	WBGene00021519	WBGene00009594
WBGene00004219	WBGene00021513	WBGene00009978
WBGene00004228	WBGene00019536	WBGene00012803
WBGene00004232	WBGene00021505	WBGene00015074
WBGene00004359	WBGene00021509	WBGene00015197
WBGene00004395	WBGene00006738	WBGene00018734
WBGene00004998	WBGene00022298	WBGene00021296
WBGene00006732	WBGene00022302	WBGene00021685
WBGene00006955	WBGene00044467	WBGene00021732
WBGene00007299	WBGene00016023	WBGene00021986
WBGene00007343	WBGene00019785	WBGene00022037
WBGene00007479	WBGene00019783	WBGene00022131
WBGene00007546	WBGene00022090	WBGene00022712
WBGene00007560	WBGene00022097	WBGene00000254
WBGene00007804	WBGene00022101	WBGene00000542
WBGene00007988	WBGene00022100	WBGene00000647
WBGene00007989	WBGene00022377	WBGene00000754
WBGene00007996	WBGene00006705	WBGene00001077
WBGene00008260	WBGene00050885	WBGene00001131
WBGene00008496	WBGene00021877	WBGene00001564
WBGene00008512	WBGene00044488	WBGene00001604
WBGene00008605	WBGene00044489	WBGene00002264
WBGene00009013	WBGene00044490	WBGene00002265
WBGene00009133	WBGene00021881	WBGene00004237
WBGene00009261	WBGene00002243	WBGene00004736
WBGene00009528	WBGene00021892	WBGene00006771
WBGene00010630	WBGene00021869	WBGene00008622
WBGene00010673	WBGene00021893	WBGene00009081
WBGene00010723	WBGene00001548	WBGene00009306
WBGene00010760	WBGene00003889	WBGene00009532
WBGene00011339	WBGene00022608	WBGene00012107
WBGene00011530	WBGene00021370	WBGene00012186
WBGene00011777	WBGene00019545	WBGene00013969
WBGene00011895	WBGene00003884	WBGene00021469
WBGene00012540	WBGene00018141	WBGene00021597
WBGene00012796	WBGene00021579	WBGene00021835
WBGene00012917	WBGene00021586	WBGene00022517
WBGene00013385	WBGene00018547	WBGene00045399
WBGene00013523	WBGene00018065
WBGene00013717	WBGene00018645
WBGene00013883	WBGene00001033
WBGene00015059	WBGene00019721
WBGene00015335	WBGene00017924
WBGene00015646	WBGene00043067
WBGene00015795	WBGene00015049
WBGene00015841	WBGene00000692
WBGene00016013	WBGene00013881
WBGene00016421	WBGene00009075
WBGene00016740	WBGene00001476
WBGene00017396	WBGene00001328
WBGene00017560	WBGene00007446
WBGene00018039	WBGene00010351
WBGene00018515	WBGene00010352
WBGene00018985	WBGene00010354
WBGene00019113	WBGene00010350
WBGene00019236	WBGene00007778
WBGene00019290	WBGene00014139
WBGene00019382	WBGene00009889
WBGene00019908	WBGene00006766
WBGene00020039	WBGene00194915
WBGene00020626	WBGene00013375
WBGene00020912	WBGene00012867
WBGene00021134	WBGene00013304
WBGene00021343	WBGene00044258
WBGene00021389	WBGene00194649
WBGene00021415	WBGene00013315
WBGene00022012	WBGene00000708
WBGene00022554	WBGene00005101
WBGene00022613	WBGene00013632
WBGene00022816	WBGene00013642
WBGene00044109	WBGene00013651
WBGene00044344	WBGene00013658
WBGene00044612	WBGene00013100
WBGene00045183	WBGene00004403
WBGene00050943	WBGene00013805
WBGene00206373	WBGene00013999
WBGene00000004	WBGene00007820
WBGene00000225	WBGene00044512
WBGene00000233	WBGene00022435
WBGene00000246	WBGene00006419
WBGene00000265	WBGene00000022
WBGene00000420	WBGene00020707
WBGene00000548	WBGene00015258
WBGene00000995	WBGene00015255
WBGene00001068	WBGene00005258
WBGene00001233	WBGene00003696
WBGene00001368	WBGene00005687
WBGene00001478	WBGene00001480
WBGene00001497	WBGene00235315
WBGene00001515	WBGene00022285
WBGene00001615	WBGene00019977
WBGene00001674	WBGene00004139
WBGene00001768	WBGene00016513
WBGene00001774	WBGene00021602
WBGene00001898	WBGene00018115
WBGene00002100	WBGene00006589
WBGene00002214	WBGene00021492
WBGene00003089	WBGene00044521
WBGene00003603	WBGene00000056
WBGene00003616	WBGene00206511
WBGene00003630	WBGene00020962
WBGene00004023	WBGene00020954
WBGene00004038	WBGene00016050
WBGene00004225	WBGene00018824
WBGene00004279	WBGene00016859
WBGene00004310	WBGene00017174
WBGene00004412	WBGene00020877
WBGene00004414	WBGene00020883
WBGene00004415	WBGene00018055
WBGene00004416	WBGene00018060
WBGene00004417	WBGene00018061
WBGene00004418	WBGene00015879
WBGene00004419	WBGene00015886
WBGene00004420	WBGene00015435
WBGene00004421	WBGene00020620
WBGene00004422	WBGene00020612
WBGene00004423	WBGene00006164
WBGene00004424	WBGene00021078
WBGene00004425	WBGene00021559
WBGene00004426	WBGene00019274
WBGene00004427	WBGene00022015
WBGene00004428	WBGene00001855
WBGene00004429	WBGene00003574
WBGene00004430	WBGene00019649
WBGene00004431	WBGene00000862
WBGene00004432	WBGene00015450
WBGene00004434	WBGene00004795
WBGene00004436	WBGene00017468
WBGene00004437	WBGene00004099
WBGene00004444	WBGene00000029
WBGene00004445	WBGene00015366
WBGene00004446	WBGene00000031
WBGene00004447	WBGene00015076
WBGene00004449	WBGene00015073
WBGene00004450	WBGene00044541
WBGene00004452	WBGene00018424
WBGene00004456	WBGene00015424
WBGene00004470	WBGene00015677
WBGene00004471	WBGene00020270
WBGene00004472	WBGene00004740
WBGene00004473	WBGene00000244
WBGene00004474	WBGene00018698
WBGene00004475	WBGene00017796
WBGene00004477	WBGene00017195
WBGene00004480	WBGene00010593
WBGene00004482	WBGene00011536
WBGene00004483	WBGene00008254
WBGene00004485	WBGene00044286
WBGene00004487	WBGene00012117
WBGene00004488	WBGene00004910
WBGene00004493	WBGene00003536
WBGene00004494	WBGene00011712
WBGene00004495	WBGene00008339
WBGene00004499	WBGene00000453
WBGene00004704	WBGene00011270
WBGene00006543	WBGene00011587
WBGene00006565	WBGene00011306
WBGene00006611	WBGene00007154
WBGene00006656	WBGene00007929
WBGene00006678	WBGene00044082
WBGene00006706	WBGene00007082
WBGene00006721	WBGene00013876
WBGene00006722	WBGene00001519
WBGene00006831	WBGene00013884
WBGene00006964	WBGene00010385
WBGene00007180	WBGene00011318
WBGene00007287	WBGene00005278
WBGene00007444	WBGene00006103
WBGene00007488	WBGene00006077
WBGene00007548	WBGene00011754
WBGene00008094	WBGene00012346
WBGene00008320	WBGene00005745
WBGene00008331	WBGene00000782
WBGene00008669	WBGene00012309
WBGene00008714	WBGene00219308
WBGene00008848	WBGene00013492
WBGene00008927	WBGene00012025
WBGene00008997	WBGene00012021
WBGene00009002	WBGene00012020
WBGene00009057	WBGene00005425
WBGene00009452	WBGene00004026
WBGene00009499	WBGene00044331
WBGene00009722	WBGene00013608
WBGene00009925	WBGene00009854
WBGene00009944	WBGene00009860
WBGene00010001	WBGene00009859
WBGene00010012	WBGene00005770
WBGene00010063	WBGene00003706
WBGene00010080	WBGene00013623
WBGene00010232	WBGene00013628
WBGene00010433	WBGene00006249
WBGene00010773	WBGene00005521
WBGene00010776	WBGene00009906
WBGene00010827	WBGene00009195
WBGene00011088	WBGene00005578
WBGene00011185	WBGene00045381
WBGene00011239	WBGene00005461
WBGene00011337	WBGene00011486
WBGene00011348	WBGene00013938
WBGene00011694	WBGene00013940
WBGene00011738	WBGene00013943
WBGene00011828	WBGene00009571
WBGene00012007	WBGene00005321
WBGene00012152	WBGene00044212
WBGene00012330	WBGene00005328
WBGene00012472	WBGene00011841
WBGene00013007	WBGene00050934
WBGene00013260	WBGene00013472
WBGene00013438	WBGene00013470
WBGene00013499	WBGene00044654
WBGene00013650	WBGene00044202
WBGene00013920	WBGene00009299
WBGene00013923	WBGene00009296
WBGene00014051	WBGene00009297
WBGene00014093	WBGene00009836
WBGene00015021	WBGene00009835
WBGene00015138	WBGene00012491
WBGene00015647	WBGene00012492
WBGene00016093	WBGene00005349
WBGene00016095	WBGene00012081
WBGene00016148	WBGene00008984
WBGene00016644	WBGene00005330
WBGene00016981	WBGene00008017
WBGene00017123	WBGene00008016
WBGene00017272	WBGene00008012
WBGene00017301	WBGene00012404
WBGene00018015	WBGene00194801
WBGene00018302	WBGene00010300
WBGene00018566	WBGene00001397
WBGene00018738	WBGene00006692
WBGene00018996	WBGene00011254
WBGene00019380	WBGene00004003
WBGene00019825	WBGene00005493
WBGene00019841	WBGene00005507
WBGene00019871	WBGene00008441
WBGene00019961	WBGene00013343
WBGene00019979	WBGene00012570
WBGene00020300	WBGene00007565
WBGene00020346	WBGene00007570
WBGene00020566	WBGene00008893
WBGene00020919	WBGene00008899
WBGene00020947	WBGene00011212
WBGene00021047	WBGene00012575
WBGene00022788	WBGene00007182
WBGene00044767	WBGene00194695
WBGene00044789	WBGene00005829
WBGene00045488	WBGene00013953
WBGene00013458	WBGene00013944
WBGene00000074	WBGene00005393
WBGene00000112	WBGene00013077
WBGene00000122	WBGene00013487
WBGene00000292	WBGene00013481
WBGene00000379	WBGene00006714
WBGene00000383	WBGene00012455
WBGene00000509	WBGene00194680
WBGene00000526	WBGene00013971
WBGene00000556	WBGene00013972
WBGene00000585	WBGene00045364
WBGene00000601	WBGene00008700
WBGene00000602	WBGene00195058
WBGene00000726	WBGene00013583
WBGene00000761	WBGene00013586
WBGene00000787	WBGene00012689
WBGene00000837	WBGene00012688
WBGene00000880	WBGene00012684
WBGene00000984	WBGene00003685
WBGene00001005	WBGene00003669
WBGene00001016	WBGene00012067
WBGene00001018	WBGene00219452
WBGene00001179	WBGene00009018
WBGene00001229	WBGene00044197
WBGene00001240	WBGene00010107
WBGene00001325	WBGene00008068
WBGene00001453	WBGene00007583
WBGene00001514	WBGene00012808
WBGene00001516	WBGene00012809
WBGene00001682	WBGene00007723
WBGene00001683	WBGene00012818
WBGene00001784	WBGene00012815
WBGene00001854	WBGene00007177
WBGene00002048	WBGene00012836
WBGene00002192	WBGene00012838
WBGene00002215	WBGene00012246
WBGene00002990	WBGene00012251
WBGene00003053	WBGene00012253
WBGene00003083	WBGene00013828
WBGene00003084	WBGene00005389
WBGene00003130	WBGene00013750
WBGene00003148	WBGene00008946
WBGene00003172	WBGene00013758
WBGene00003253	WBGene00013765
WBGene00003372	WBGene00013832
WBGene00003517	WBGene00013771
WBGene00003593	WBGene00005147
WBGene00003618	WBGene00007126
WBGene00003661	WBGene00009166
WBGene00003691	WBGene00001691
WBGene00003727	WBGene00009762
WBGene00003746	WBGene00001248
WBGene00003765	WBGene00001547
WBGene00003767	WBGene00022203
WBGene00003768	WBGene00022213
WBGene00003865	WBGene00004011
WBGene00003950	WBGene00022504
WBGene00004033	WBGene00020494
WBGene00004043	WBGene00018938
WBGene00004108	WBGene00019146
WBGene00004182	WBGene00016487
WBGene00004204	WBGene00001237
WBGene00004321	WBGene00000185
WBGene00004326	WBGene00219451
WBGene00004369	WBGene00018589
WBGene00004387	WBGene00044701
WBGene00004462	WBGene00020135
WBGene00004826	WBGene00020767
WBGene00004929	WBGene00019321
WBGene00005008	WBGene00019735
WBGene00005648	WBGene00015293
WBGene00006331	WBGene00006408
WBGene00006450	WBGene00016559
WBGene00006493	WBGene00001803
WBGene00006504	WBGene00018258
WBGene00006514	WBGene00003732
WBGene00006594	WBGene00000283
WBGene00006638	WBGene00015564
WBGene00006649	WBGene00018607
WBGene00006660	WBGene00004335
WBGene00006704	WBGene00016531
WBGene00006794	WBGene00001000
WBGene00006839	WBGene00019987
WBGene00006862	WBGene00018227
WBGene00006916	WBGene00018283
WBGene00007013	WBGene00006587
WBGene00007189	WBGene00006764
WBGene00007256	WBGene00022315
WBGene00007288	WBGene00006881
WBGene00007395	WBGene00008952
WBGene00007529	WBGene00003514
WBGene00007587	WBGene00000217
WBGene00007592	WBGene00010492
WBGene00007601	WBGene00007849
WBGene00007630	WBGene00007904
WBGene00007882	WBGene00007750
WBGene00007890	WBGene00007751
WBGene00007913	WBGene00009303
WBGene00007927	WBGene00010702
WBGene00007975	WBGene00010331
WBGene00008052	WBGene00002280
WBGene00008100	WBGene00020794
WBGene00008132	WBGene00004776
WBGene00008183	WBGene00015673
WBGene00008195	WBGene00000294
WBGene00008196	WBGene00304806
WBGene00008197	WBGene00018310
WBGene00008218	WBGene00003370
WBGene00008332	WBGene00015868
WBGene00008395	WBGene00020732
WBGene00008412	WBGene00022278
WBGene00008414	WBGene00022275
WBGene00008514	WBGene00018771
WBGene00008555	WBGene00016903
WBGene00008601	WBGene00016902
WBGene00008765	WBGene00016906
WBGene00008780	WBGene00020090
WBGene00008781	WBGene00235388
WBGene00008856	WBGene00021028
WBGene00008876	WBGene00002040
WBGene00008886	WBGene00020281
WBGene00008993	WBGene00022519
WBGene00009243	WBGene00022390
WBGene00009341	WBGene00022385
WBGene00009380	WBGene00022391
WBGene00009439	WBGene00236808
WBGene00009626	WBGene00021335
WBGene00009674	WBGene00004952
WBGene00009726	WBGene00022838
WBGene00009888	WBGene00022837
WBGene00010018	WBGene00000165
WBGene00010079	WBGene00001707
WBGene00010115	WBGene00044896
WBGene00010117	WBGene00019674
WBGene00010224	WBGene00001773
WBGene00010251	WBGene00004969
WBGene00010356	WBGene00018580
WBGene00010409	WBGene00018579
WBGene00010525	WBGene00001115
WBGene00010730	WBGene00003111
WBGene00010766	WBGene00185098
WBGene00010770	WBGene00044347
WBGene00010778	WBGene00006461
WBGene00011015	WBGene00021763
WBGene00011071	WBGene00021239
WBGene00011292	WBGene00044435
WBGene00011415	WBGene00021346
WBGene00011451	WBGene00017398
WBGene00011527	WBGene00021471
WBGene00011540	WBGene00077563
WBGene00011756	WBGene00021473
WBGene00011814	WBGene00017741
WBGene00011832	WBGene00017736
WBGene00011885	WBGene00022281
WBGene00011953	WBGene00016950
WBGene00012004	WBGene00000832
WBGene00012005	WBGene00021271
WBGene00012337	WBGene00023172
WBGene00012347	WBGene00018232
WBGene00012348	WBGene00022126
WBGene00012351	WBGene00022112
WBGene00012358	WBGene00022110
WBGene00012440	WBGene00004049
WBGene00012484	WBGene00022108
WBGene00012978	WBGene00003387
WBGene00013008	WBGene00020914
WBGene00013146	WBGene00021038
WBGene00013217	WBGene00017650
WBGene00013543	WBGene00016839
WBGene00013577	WBGene00017909
WBGene00013639	WBGene00000779
WBGene00013688	WBGene00006820
WBGene00014001	WBGene00016565
WBGene00014075	WBGene00016561
WBGene00014092	WBGene00019769
WBGene00014171	WBGene00006797
WBGene00014262	WBGene00006508
WBGene00015008	WBGene00022634
WBGene00015141	WBGene00006819
WBGene00015208	WBGene00001598
WBGene00015235	WBGene00006754
WBGene00015291	WBGene00009188
WBGene00015430	WBGene00003777
WBGene00015484	WBGene00002179
WBGene00015508	WBGene00007911
WBGene00015684	WBGene00007977
WBGene00015759	WBGene00016461
WBGene00015769	WBGene00077519
WBGene00015866	WBGene00013125
WBGene00015887	WBGene00206530
WBGene00015896	WBGene00005517
WBGene00015919	WBGene00013179
WBGene00015926	WBGene00009753
WBGene00016020	WBGene00013181
WBGene00016119	WBGene00219319
WBGene00016292	WBGene00000410
WBGene00016325	WBGene00000010
WBGene00016331	WBGene00007766
WBGene00016408	WBGene00010651
WBGene00016500	WBGene00000641
WBGene00016507	WBGene00010654
WBGene00016508	WBGene00010653
WBGene00016535	WBGene00009315
WBGene00016611	WBGene00008853
WBGene00016645	WBGene00008854
WBGene00016655	WBGene00008858
WBGene00016659	WBGene00002232
WBGene00016661	WBGene00206532
WBGene00016671	WBGene00009416
WBGene00016728	WBGene00001045
WBGene00016741	WBGene00012961
WBGene00016894	WBGene00004509
WBGene00016992	WBGene00010821
WBGene00017023	WBGene00007603
WBGene00017283	WBGene00009616
WBGene00017293	WBGene00010168
WBGene00017302	WBGene00011781
WBGene00017390	WBGene00008476
WBGene00017582	WBGene00003098
WBGene00017735	WBGene00012102
WBGene00017757	WBGene00006829
WBGene00017770	WBGene00004181
WBGene00017834	WBGene00012209
WBGene00017885	WBGene00012214
WBGene00017954	WBGene00077769
WBGene00017982	WBGene00009359
WBGene00018006	WBGene00009363
WBGene00018131	WBGene00011586
WBGene00018267	WBGene00012478
WBGene00018349	WBGene00012480
WBGene00018395	WBGene00012500
WBGene00018400	WBGene00009061
WBGene00018532	WBGene00006048
WBGene00018657	WBGene00014201
WBGene00018702	WBGene00011434
WBGene00018710	WBGene00007214
WBGene00018719	WBGene00007213
WBGene00018739	WBGene00012289
WBGene00018764	WBGene00013599
WBGene00018804	WBGene00012391
WBGene00018847	WBGene00012576
WBGene00018974	WBGene00012365
WBGene00019102	WBGene00012238
WBGene00019111	WBGene00006616
WBGene00019185	WBGene00013502
WBGene00019211	WBGene00045058
WBGene00019294	WBGene00007991
WBGene00019298	WBGene00004202
WBGene00019317	WBGene00014103
WBGene00019457	WBGene00008187
WBGene00019487	WBGene00008188
WBGene00019509	WBGene00010578
WBGene00019693	WBGene00009865
WBGene00019697	WBGene00013666
WBGene00019719	WBGene00013668
WBGene00019726	WBGene00006824
WBGene00019780	WBGene00002978
WBGene00019827	WBGene00013692
WBGene00019831	WBGene00006789
WBGene00019946	WBGene00020837
WBGene00020112	WBGene00020205
WBGene00020181	WBGene00020171
WBGene00020339	WBGene00018507
WBGene00020446	WBGene00017875
WBGene00020497	WBGene00017873
WBGene00020604	WBGene00000106
WBGene00020636	WBGene00016308
WBGene00020658	WBGene00019700
WBGene00020693	WBGene00019699
WBGene00020781	WBGene00006195
WBGene00020917	WBGene00019306
WBGene00020931	WBGene00003545
WBGene00020948	WBGene00023410
WBGene00020949	WBGene00021968
WBGene00020951	WBGene00018819
WBGene00020957	WBGene00018815
WBGene00021149	WBGene00019209
WBGene00021156	WBGene00019207
WBGene00021170	WBGene00019415
WBGene00021248	WBGene00020327
WBGene00021292	WBGene00020329
WBGene00021460	WBGene00015599
WBGene00021562	WBGene00019037
WBGene00021646	WBGene00019035
WBGene00021845	WBGene00018442
WBGene00021863	WBGene00018436
WBGene00021890	WBGene00269388
WBGene00021909	WBGene00018105
WBGene00022059	WBGene00018102
WBGene00022125	WBGene00269389
WBGene00022127	WBGene00020361
WBGene00022532	WBGene00015830
WBGene00022580	WBGene00015827
WBGene00022583	WBGene00018667
WBGene00022749	WBGene00022690
WBGene00022750	WBGene00206415
WBGene00022855	WBGene00017213
WBGene00023418	WBGene00020533
WBGene00044191	WBGene00044360
WBGene00044326	WBGene00016337
WBGene00044636	WBGene00016341
WBGene00045272	WBGene00016342
WBGene00045418	WBGene00018783
WBGene00045475	WBGene00019592
WBGene00077690	WBGene00019593
WBGene00000040	WBGene00019591
WBGene00000064	WBGene00305114
WBGene00000101	WBGene00017525
WBGene00000105	WBGene00004129
WBGene00000109	WBGene00018769
WBGene00000110	WBGene00019343
WBGene00000117	WBGene00005574
WBGene00000123	WBGene00005573
WBGene00000142	WBGene00020231
WBGene00000151	WBGene00044367
WBGene00000156	WBGene00017918
WBGene00000163	WBGene00017911
WBGene00000170	WBGene00017255
WBGene00000176	WBGene00022452
WBGene00000183	WBGene00022714
WBGene00000197	WBGene00022716
WBGene00000207	WBGene00019511
WBGene00000231	WBGene00016574
WBGene00000249	WBGene00015199
WBGene00000251	WBGene00005542
WBGene00000252	WBGene00005543
WBGene00000276	WBGene00002102
WBGene00000369	WBGene00020407
WBGene00000371	WBGene00017181
WBGene00000376	WBGene00017179
WBGene00000380	WBGene00018198
WBGene00000382	WBGene00021589
WBGene00000425	WBGene00017451
WBGene00000441	WBGene00017557
WBGene00000443	WBGene00015856
WBGene00000475	WBGene00021721
WBGene00000479	WBGene00021117
WBGene00000502	WBGene00017406
WBGene00000508	WBGene00044811
WBGene00000534	WBGene00021171
WBGene00000547	WBGene00271824
WBGene00000550	WBGene00017947
WBGene00000608	WBGene00006495
WBGene00000609	WBGene00017948
WBGene00000615	WBGene00206414
WBGene00000636	WBGene00015116
WBGene00000639	WBGene00021057
WBGene00000653	WBGene00001948
WBGene00000678	WBGene00015134
WBGene00000683	WBGene00018048
WBGene00000693	WBGene00004737
WBGene00000698	WBGene00019410
WBGene00000703	WBGene00022874
WBGene00000711	WBGene00004346
WBGene00000713	WBGene00020479
WBGene00000728	WBGene00016890
WBGene00000735	WBGene00001597
WBGene00000748	WBGene00004244
WBGene00000751	WBGene00018397
WBGene00000767	WBGene00023408
WBGene00000776	WBGene00011468
WBGene00000800	WBGene00011755
WBGene00000843	WBGene00011579
WBGene00000854	WBGene00007688
WBGene00000882	WBGene00004174
WBGene00000897	WBGene00007334
WBGene00000908	WBGene00006853
WBGene00000914	WBGene00008137
WBGene00000941	WBGene00003979
WBGene00000962	WBGene00010787
WBGene00000975	WBGene00012219
WBGene00001029	WBGene00012220
WBGene00001031	WBGene00012457
WBGene00001032	WBGene00012462
WBGene00001034	WBGene00013247
WBGene00001039	WBGene00016825
WBGene00001042	WBGene00016826
WBGene00001047	WBGene00012285
WBGene00001059	WBGene00012288
WBGene00001067	WBGene00008838
WBGene00001081	WBGene00011878
WBGene00001086	WBGene00012894
WBGene00001088	WBGene00012905
WBGene00001089	WBGene00012920
WBGene00001093	WBGene00012914
WBGene00001094	WBGene00009390
WBGene00001130	WBGene00010269
WBGene00001137	WBGene00008929
WBGene00001160	WBGene00012987
WBGene00001182	WBGene00012993
WBGene00001208	WBGene00012997
WBGene00001225	WBGene00010069
WBGene00001228	WBGene00013208
WBGene00001234	WBGene00011052
WBGene00001262	WBGene00008578
WBGene00001336	WBGene00013096
WBGene00001340	WBGene00044074
WBGene00001358	WBGene00012332
WBGene00001387	WBGene00012333
WBGene00001395	WBGene00000662
WBGene00001411	WBGene00010721
WBGene00001430	WBGene00010720
WBGene00001441	WBGene00012227
WBGene00001491	WBGene00001133
WBGene00001496	WBGene00012979
WBGene00001498	WBGene00013221
WBGene00001501	WBGene00010193
WBGene00001503	WBGene00013190
WBGene00001520	WBGene00000208
WBGene00001574	WBGene00013166
WBGene00001584	WBGene00016221
WBGene00001596	WBGene00016226
WBGene00001628	WBGene00020541
WBGene00001633	WBGene00020546
WBGene00001635	WBGene00006894
WBGene00001645	WBGene00002230
WBGene00001651	WBGene00017937
WBGene00001694	WBGene00016030
WBGene00001703	WBGene00020457
WBGene00001714	WBGene00019915
WBGene00001716	WBGene00015266
WBGene00001755	WBGene00022488
WBGene00001824	WBGene00022344
WBGene00001840	WBGene00022353
WBGene00001972	WBGene00021261
WBGene00001999	WBGene00005141
WBGene00002038	WBGene00021592
WBGene00002046	WBGene00020116
WBGene00002059	WBGene00020117
WBGene00002061	WBGene00005143
WBGene00002066	WBGene00021439
WBGene00002071	WBGene00019709
WBGene00002081	WBGene00021433
WBGene00002083	WBGene00021700
WBGene00002152	WBGene00016524
WBGene00002162	WBGene00021866
WBGene00002191	WBGene00021022
WBGene00002196	WBGene00017103
WBGene00002201	WBGene00021850
WBGene00002202	WBGene00021853
WBGene00002203	WBGene00003941
WBGene00002207	WBGene00022175
WBGene00002223	WBGene00022177
WBGene00002238	WBGene00022181
WBGene00002250	WBGene00019996
WBGene00002266	WBGene00019997
WBGene00002295	WBGene00019158
WBGene00002335	WBGene00019170
WBGene00002344	WBGene00020100
WBGene00002632	WBGene00020105
WBGene00002637	WBGene00021808
WBGene00002783	WBGene00021815
WBGene00002981	WBGene00004976
WBGene00003002	WBGene00007920
WBGene00003003	WBGene00001639
WBGene00003014	WBGene00008287
WBGene00003025	WBGene00006822
WBGene00003026	WBGene00000070
WBGene00003030	WBGene00021900
WBGene00003048	WBGene00021902
WBGene00003052	WBGene00022664
WBGene00003059	WBGene00019837
WBGene00003061	WBGene00004114
WBGene00003064	WBGene00000435
WBGene00003068	WBGene00017146
WBGene00003072	WBGene00017774
WBGene00003073	WBGene00018563
WBGene00003082	WBGene00022420
WBGene00003085	WBGene00220259
WBGene00003234	WBGene00015582
WBGene00003378	WBGene00015581
WBGene00003388	WBGene00015580
WBGene00003391	WBGene00015386
WBGene00003530	WBGene00003597
WBGene00003553	WBGene00008170
WBGene00003554	WBGene00044903
WBGene00003559	WBGene00000564
WBGene00003564	WBGene00011561
WBGene00003566	WBGene00010838
WBGene00003586	WBGene00010839
WBGene00003596	WBGene00010362
WBGene00003619	WBGene00006784
WBGene00003623	WBGene00012863
WBGene00003628	WBGene00006873
WBGene00003635	WBGene00012271
WBGene00003639	WBGene00012972
WBGene00003659	WBGene00012356
WBGene00003678	WBGene00006604
WBGene00003695	WBGene00012933
WBGene00003762	WBGene00012125
WBGene00003773	WBGene00013447
WBGene00003789	WBGene00013448
WBGene00003796	WBGene00004960
WBGene00003825	WBGene00219421
WBGene00003827	WBGene00013424
WBGene00003830	WBGene00004165
WBGene00003904	WBGene00012761
WBGene00003911	WBGene00007681
WBGene00003914	WBGene00013231
WBGene00003920
WBGene00003929
WBGene00003947
WBGene00003949
WBGene00003953
WBGene00003961
WBGene00003982
WBGene00004015
WBGene00004025
WBGene00004034
WBGene00004040
WBGene00004053
WBGene00004075
WBGene00004076
WBGene00004077
WBGene00004091
WBGene00004124
WBGene00004134
WBGene00004136
WBGene00004147
WBGene00004152
WBGene00004167
WBGene00004187
WBGene00004205
WBGene00004208
WBGene00004230
WBGene00004235
WBGene00004254
WBGene00004259
WBGene00004271
WBGene00004274
WBGene00004304
WBGene00004306
WBGene00004311
WBGene00004339
WBGene00004371
WBGene00004373
WBGene00004459
WBGene00004463
WBGene00004467
WBGene00004501
WBGene00004502
WBGene00004503
WBGene00004504
WBGene00004682
WBGene00004698
WBGene00004701
WBGene00004703
WBGene00004738
WBGene00004739
WBGene00004756
WBGene00004759
WBGene00004767
WBGene00004773
WBGene00004788
WBGene00004804
WBGene00004807
WBGene00004829
WBGene00004855
WBGene00004858
WBGene00004884
WBGene00004889
WBGene00004897
WBGene00004946
WBGene00004951
WBGene00005009
WBGene00005015
WBGene00005019
WBGene00005021
WBGene00005022
WBGene00005023
WBGene00006307
WBGene00006364
WBGene00006367
WBGene00006392
WBGene00006410
WBGene00006414
WBGene00006423
WBGene00006432
WBGene00006434
WBGene00006437
WBGene00006438
WBGene00006446
WBGene00006465
WBGene00006467
WBGene00006474
WBGene00006476
WBGene00006494
WBGene00006497
WBGene00006530
WBGene00006568
WBGene00006574
WBGene00006575
WBGene00006579
WBGene00006606
WBGene00006617
WBGene00006640
WBGene00006708
WBGene00006713
WBGene00006720
WBGene00006728
WBGene00006733
WBGene00006734
WBGene00006760
WBGene00006768
WBGene00006780
WBGene00006791
WBGene00006796
WBGene00006817
WBGene00006870
WBGene00006888
WBGene00006912
WBGene00006913
WBGene00006918
WBGene00006947
WBGene00006975
WBGene00006997
WBGene00007000
WBGene00007009
WBGene00007024
WBGene00007042
WBGene00007048
WBGene00007099
WBGene00007110
WBGene00007135
WBGene00007195
WBGene00007223
WBGene00007257
WBGene00007350
WBGene00007355
WBGene00007385
WBGene00007402
WBGene00007428
WBGene00007505
WBGene00007520
WBGene00007534
WBGene00007549
WBGene00007553
WBGene00007555
WBGene00007588
WBGene00007646
WBGene00007696
WBGene00007698
WBGene00007746
WBGene00007812
WBGene00007898
WBGene00007926
WBGene00007969
WBGene00008000
WBGene00008006
WBGene00008019
WBGene00008053
WBGene00008136
WBGene00008211
WBGene00008225
WBGene00008266
WBGene00008274
WBGene00008363
WBGene00008411
WBGene00008430
WBGene00008480
WBGene00008532
WBGene00008666
WBGene00008682
WBGene00008684
WBGene00008685
WBGene00008686
WBGene00008711
WBGene00008748
WBGene00008764
WBGene00008800
WBGene00008832
WBGene00008851
WBGene00008852
WBGene00008859
WBGene00008922
WBGene00008948
WBGene00008956
WBGene00008987
WBGene00008999
WBGene00009084
WBGene00009094
WBGene00009098
WBGene00009120
WBGene00009121
WBGene00009122
WBGene00009141
WBGene00009142
WBGene00009164
WBGene00009187
WBGene00009241
WBGene00009245
WBGene00009262
WBGene00009264
WBGene00009284
WBGene00009311
WBGene00009454
WBGene00009460
WBGene00009477
WBGene00009498
WBGene00009508
WBGene00009559
WBGene00009561
WBGene00009574
WBGene00009583
WBGene00009660
WBGene00009740
WBGene00009770
WBGene00009771
WBGene00009785
WBGene00009793
WBGene00009797
WBGene00009809
WBGene00009818
WBGene00009880
WBGene00009882
WBGene00009915
WBGene00009930
WBGene00009952
WBGene00009983
WBGene00009987
WBGene00009993
WBGene00009996
WBGene00010035
WBGene00010055
WBGene00010111
WBGene00010199
WBGene00010225
WBGene00010262
WBGene00010280
WBGene00010284
WBGene00010303
WBGene00010321
WBGene00010333
WBGene00010337
WBGene00010407
WBGene00010449
WBGene00010453
WBGene00010470
WBGene00010476
WBGene00010479
WBGene00010480
WBGene00010550
WBGene00010557
WBGene00010560
WBGene00010579
WBGene00010595
WBGene00010629
WBGene00010631
WBGene00010639
WBGene00010640
WBGene00010641
WBGene00010681
WBGene00010699
WBGene00010736
WBGene00010740
WBGene00010780
WBGene00010785
WBGene00010790
WBGene00010796
WBGene00010828
WBGene00010840
WBGene00010878
WBGene00010882
WBGene00010943
WBGene00010945
WBGene00010993
WBGene00011033
WBGene00011036
WBGene00011050
WBGene00011105
WBGene00011111
WBGene00011122
WBGene00011227
WBGene00011240
WBGene00011259
WBGene00011298
WBGene00011311
WBGene00011312
WBGene00011333
WBGene00011408
WBGene00011409
WBGene00011488
WBGene00011501
WBGene00011526
WBGene00011528
WBGene00011538
WBGene00011564
WBGene00011580
WBGene00011629
WBGene00011639
WBGene00011696
WBGene00011713
WBGene00011802
WBGene00011815
WBGene00011833
WBGene00011835
WBGene00011887
WBGene00011890
WBGene00011932
WBGene00011962
WBGene00011965
WBGene00011970
WBGene00011971
WBGene00011978
WBGene00011985
WBGene00011994
WBGene00012031
WBGene00012094
WBGene00012097
WBGene00012121
WBGene00012123
WBGene00012136
WBGene00012144
WBGene00012148
WBGene00012167
WBGene00012179
WBGene00012184
WBGene00012193
WBGene00012194
WBGene00012203
WBGene00012230
WBGene00012243
WBGene00012245
WBGene00012339
WBGene00012344
WBGene00012354
WBGene00012359
WBGene00012360
WBGene00012444
WBGene00012497
WBGene00012538
WBGene00012591
WBGene00012608
WBGene00012704
WBGene00012829
WBGene00012869
WBGene00012896
WBGene00012903
WBGene00012929
WBGene00012943
WBGene00013103
WBGene00013127
WBGene00013143
WBGene00013203
WBGene00013219
WBGene00013236
WBGene00013263
WBGene00013379
WBGene00013497
WBGene00013597
WBGene00013734
WBGene00013892
WBGene00013895
WBGene00014000
WBGene00014013
WBGene00014016
WBGene00014096
WBGene00014109
WBGene00014111
WBGene00014151
WBGene00014164
WBGene00014165
WBGene00014219
WBGene00014244
WBGene00015125
WBGene00015155
WBGene00015164
WBGene00015168
WBGene00015172
WBGene00015298
WBGene00015329
WBGene00015330
WBGene00015344
WBGene00015349
WBGene00015391
WBGene00015418
WBGene00015460
WBGene00015463
WBGene00015481
WBGene00015485
WBGene00015660
WBGene00015703
WBGene00015734
WBGene00015778
WBGene00015791
WBGene00015794
WBGene00015810
WBGene00015811
WBGene00015813
WBGene00015814
WBGene00015920
WBGene00015941
WBGene00016002
WBGene00016015
WBGene00016019
WBGene00016045
WBGene00016059
WBGene00016140
WBGene00016146
WBGene00016167
WBGene00016170
WBGene00016173
WBGene00016200
WBGene00016235
WBGene00016250
WBGene00016258
WBGene00016261
WBGene00016310
WBGene00016318
WBGene00016326
WBGene00016354
WBGene00016405
WBGene00016439
WBGene00016452
WBGene00016489
WBGene00016494
WBGene00016716
WBGene00016735
WBGene00016803
WBGene00016955
WBGene00016989
WBGene00016995
WBGene00017004
WBGene00017075
WBGene00017119
WBGene00017163
WBGene00017244
WBGene00017274
WBGene00017311
WBGene00017372
WBGene00017419
WBGene00017431
WBGene00017480
WBGene00017563
WBGene00017571
WBGene00017606
WBGene00017648
WBGene00017717
WBGene00017759
WBGene00017760
WBGene00017773
WBGene00017785
WBGene00017786
WBGene00017816
WBGene00017852
WBGene00017855
WBGene00017891
WBGene00017920
WBGene00017928
WBGene00017964
WBGene00017970
WBGene00018008
WBGene00018051
WBGene00018132
WBGene00018151
WBGene00018152
WBGene00018208
WBGene00018218
WBGene00018250
WBGene00018285
WBGene00018316
WBGene00018341
WBGene00018421
WBGene00018426
WBGene00018475
WBGene00018491
WBGene00018509
WBGene00018510
WBGene00018522
WBGene00018533
WBGene00018562
WBGene00018572
WBGene00018682
WBGene00018697
WBGene00018701
WBGene00018756
WBGene00018849
WBGene00018967
WBGene00018986
WBGene00019001
WBGene00019061
WBGene00019118
WBGene00019162
WBGene00019212
WBGene00019250
WBGene00019272
WBGene00019296
WBGene00019301
WBGene00019305
WBGene00019334
WBGene00019504
WBGene00019521
WBGene00019620
WBGene00019628
WBGene00019678
WBGene00019680
WBGene00019686
WBGene00019748
WBGene00019816
WBGene00019877
WBGene00019890
WBGene00019893
WBGene00019940
WBGene00019953
WBGene00019960
WBGene00019983
WBGene00020022
WBGene00020033
WBGene00020038
WBGene00020047
WBGene00020102
WBGene00020107
WBGene00020148
WBGene00020184
WBGene00020185
WBGene00020216
WBGene00020245
WBGene00020297
WBGene00020301
WBGene00020398
WBGene00020423
WBGene00020441
WBGene00020464
WBGene00020481
WBGene00020496
WBGene00020551
WBGene00020553
WBGene00020554
WBGene00020592
WBGene00020628
WBGene00020649
WBGene00020679
WBGene00020683
WBGene00020721
WBGene00020762
WBGene00020770
WBGene00020801
WBGene00020806
WBGene00020821
WBGene00020823
WBGene00020868
WBGene00020911
WBGene00020936
WBGene00021326
WBGene00021391
WBGene00021466
WBGene00021468
WBGene00021470
WBGene00021532
WBGene00021628
WBGene00021692
WBGene00021834
WBGene00021888
WBGene00021899
WBGene00021912
WBGene00021956
WBGene00022069
WBGene00022169
WBGene00022170
WBGene00022199
WBGene00022235
WBGene00022245
WBGene00022279
WBGene00022456
WBGene00022500
WBGene00022631
WBGene00022643
WBGene00022680
WBGene00022703
WBGene00022718
WBGene00022748
WBGene00022783
WBGene00022787
WBGene00022793
WBGene00022794
WBGene00022814
WBGene00022852
WBGene00022880
WBGene00022882
WBGene00044026
WBGene00044069
WBGene00044071
WBGene00044077
WBGene00044324
WBGene00044396
WBGene00044483
WBGene00044553
WBGene00044779
WBGene00044989
WBGene00045419
WBGene00077526
WBGene00077697
WBGene00077761
WBGene00175030
WBGene00195248
WBGene00000041
WBGene00000080
WBGene00000083
WBGene00000100
WBGene00000107
WBGene00000114
WBGene00000115
WBGene00000146
WBGene00000149
WBGene00000161
WBGene00000175
WBGene00000221
WBGene00000223
WBGene00000229
WBGene00000240
WBGene00000253
WBGene00000256
WBGene00000273
WBGene00000282
WBGene00000293
WBGene00000298
WBGene00000366
WBGene00000377
WBGene00000381
WBGene00000407
WBGene00000421
WBGene00000528
WBGene00000552
WBGene00000599
WBGene00000603
WBGene00000606
WBGene00000616
WBGene00000626
WBGene00000649
WBGene00000656
WBGene00000657
WBGene00000667
WBGene00000668
WBGene00000669
WBGene00000672
WBGene00000673
WBGene00000677
WBGene00000680
WBGene00000681
WBGene00000696
WBGene00000699
WBGene00000707
WBGene00000712
WBGene00000715
WBGene00000717
WBGene00000718
WBGene00000722
WBGene00000732
WBGene00000733
WBGene00000739
WBGene00000740
WBGene00000742
WBGene00000802
WBGene00000831
WBGene00000833
WBGene00000871
WBGene00000876
WBGene00000879
WBGene00000881
WBGene00000883
WBGene00000887
WBGene00000894
WBGene00000898
WBGene00000901
WBGene00000912
WBGene00000915
WBGene00000928
WBGene00000938
WBGene00000963
WBGene00000976
WBGene00001006
WBGene00001008
WBGene00001023
WBGene00001030
WBGene00001038
WBGene00001066
WBGene00001070
WBGene00001072
WBGene00001073
WBGene00001074
WBGene00001080
WBGene00001134
WBGene00001149
WBGene00001159
WBGene00001163
WBGene00001167
WBGene00001168
WBGene00001169
WBGene00001173
WBGene00001177
WBGene00001184
WBGene00001194
WBGene00001196
WBGene00001209
WBGene00001226
WBGene00001227
WBGene00001239
WBGene00001251
WBGene00001303
WBGene00001329
WBGene00001330
WBGene00001393
WBGene00001396
WBGene00001398
WBGene00001405
WBGene00001423
WBGene00001428
WBGene00001431
WBGene00001443
WBGene00001479
WBGene00001493
WBGene00001502
WBGene00001510
WBGene00001527
WBGene00001558
WBGene00001559
WBGene00001562
WBGene00001565
WBGene00001582
WBGene00001592
WBGene00001631
WBGene00001649
WBGene00001684
WBGene00001685
WBGene00001713
WBGene00001725
WBGene00001744
WBGene00001748
WBGene00001843
WBGene00001851
WBGene00001955
WBGene00001993
WBGene00001994
WBGene00002000
WBGene00002005
WBGene00002007
WBGene00002008
WBGene00002010
WBGene00002024
WBGene00002025
WBGene00002037
WBGene00002045
WBGene00002053
WBGene00002065
WBGene00002070
WBGene00002074
WBGene00002077
WBGene00002078
WBGene00002080
WBGene00002127
WBGene00002134
WBGene00002135
WBGene00002163
WBGene00002189
WBGene00002258
WBGene00002262
WBGene00002363
WBGene00002717
WBGene00002845
WBGene00002879
WBGene00002889
WBGene00002891
WBGene00002915
WBGene00003009
WBGene00003012
WBGene00003034
WBGene00003040
WBGene00003044
WBGene00003055
WBGene00003063
WBGene00003071
WBGene00003112
WBGene00003124
WBGene00003132
WBGene00003144
WBGene00003151
WBGene00003161
WBGene00003162
WBGene00003163
WBGene00003178
WBGene00003214
WBGene00003218
WBGene00003367
WBGene00003400
WBGene00003476
WBGene00003482
WBGene00003485
WBGene00003497
WBGene00003511
WBGene00003528
WBGene00003588
WBGene00003598
WBGene00003600
WBGene00003610
WBGene00003613
WBGene00003622
WBGene00003625
WBGene00003633
WBGene00003636
WBGene00003638
WBGene00003656
WBGene00003658
WBGene00003681
WBGene00003687
WBGene00003704
WBGene00003728
WBGene00003736
WBGene00003771
WBGene00003776
WBGene00003785
WBGene00003793
WBGene00003795
WBGene00003818
WBGene00003821
WBGene00003822
WBGene00003831
WBGene00003847
WBGene00003858
WBGene00003887
WBGene00003891
WBGene00003902
WBGene00003903
WBGene00003915
WBGene00003916
WBGene00003918
WBGene00003928
WBGene00003936
WBGene00003951
WBGene00003962
WBGene00003963
WBGene00003964
WBGene00003968
WBGene00004014
WBGene00004095
WBGene00004109
WBGene00004110
WBGene00004120
WBGene00004131
WBGene00004132
WBGene00004143
WBGene00004164
WBGene00004172
WBGene00004175
WBGene00004183
WBGene00004189
WBGene00004210
WBGene00004217
WBGene00004222
WBGene00004227
WBGene00004245
WBGene00004256
WBGene00004258
WBGene00004264
WBGene00004272
WBGene00004300
WBGene00004313
WBGene00004336
WBGene00004358
WBGene00004397
WBGene00004398
WBGene00004408
WBGene00004409
WBGene00004410
WBGene00004458
WBGene00004464
WBGene00004465
WBGene00004469
WBGene00004751
WBGene00004755
WBGene00004760
WBGene00004768
WBGene00004783
WBGene00004859
WBGene00004862
WBGene00004900
WBGene00004902
WBGene00004911
WBGene00004930
WBGene00004945
WBGene00004947
WBGene00004980
WBGene00005016
WBGene00005018
WBGene00005663
WBGene00006066
WBGene00006220
WBGene00006342
WBGene00006352
WBGene00006353
WBGene00006366
WBGene00006369
WBGene00006373
WBGene00006407
WBGene00006439
WBGene00006444
WBGene00006462
WBGene00006472
WBGene00006483
WBGene00006518
WBGene00006523
WBGene00006528
WBGene00006529
WBGene00006536
WBGene00006537
WBGene00006591
WBGene00006592
WBGene00006593
WBGene00006595
WBGene00006599
WBGene00006603
WBGene00006626
WBGene00006686
WBGene00006699
WBGene00006702
WBGene00006725
WBGene00006727
WBGene00006739
WBGene00006769
WBGene00006773
WBGene00006779
WBGene00006786
WBGene00006787
WBGene00006803
WBGene00006815
WBGene00006833
WBGene00006840
WBGene00006861
WBGene00006876
WBGene00006882
WBGene00006890
WBGene00006910
WBGene00006911
WBGene00006914
WBGene00006917
WBGene00006919
WBGene00006920
WBGene00006921
WBGene00006923
WBGene00006924
WBGene00006934
WBGene00006941
WBGene00006950
WBGene00006956
WBGene00006959
WBGene00006996
WBGene00007012
WBGene00007016
WBGene00007030
WBGene00007053
WBGene00007058
WBGene00007071
WBGene00007137
WBGene00007142
WBGene00007143
WBGene00007150
WBGene00007178
WBGene00007227
WBGene00007264
WBGene00007270
WBGene00007275
WBGene00007352
WBGene00007365
WBGene00007384
WBGene00007409
WBGene00007449
WBGene00007463
WBGene00007474
WBGene00007492
WBGene00007514
WBGene00007545
WBGene00007586
WBGene00007651
WBGene00007679
WBGene00007736
WBGene00007779
WBGene00007836
WBGene00007841
WBGene00007848
WBGene00007877
WBGene00007903
WBGene00007934
WBGene00007947
WBGene00007999
WBGene00008032
WBGene00008089
WBGene00008117
WBGene00008205
WBGene00008215
WBGene00008224
WBGene00008233
WBGene00008270
WBGene00008362
WBGene00008404
WBGene00008419
WBGene00008505
WBGene00008506
WBGene00008521
WBGene00008549
WBGene00008652
WBGene00008664
WBGene00008683
WBGene00008688
WBGene00008707
WBGene00008743
WBGene00008803
WBGene00008857
WBGene00008920
WBGene00008926
WBGene00008940
WBGene00008964
WBGene00008975
WBGene00009050
WBGene00009082
WBGene00009112
WBGene00009119
WBGene00009126
WBGene00009158
WBGene00009177
WBGene00009218
WBGene00009334
WBGene00009340
WBGene00009342
WBGene00009349
WBGene00009367
WBGene00009405
WBGene00009450
WBGene00009453
WBGene00009482
WBGene00009542
WBGene00009552
WBGene00009584
WBGene00009587
WBGene00009621
WBGene00009628
WBGene00009661
WBGene00009678
WBGene00009712
WBGene00009717
WBGene00009723
WBGene00009724
WBGene00009772
WBGene00009783
WBGene00009787
WBGene00009812
WBGene00009813
WBGene00009829
WBGene00009918
WBGene00009926
WBGene00009947
WBGene00009980
WBGene00009982
WBGene00010037
WBGene00010052
WBGene00010135
WBGene00010221
WBGene00010260
WBGene00010279
WBGene00010291
WBGene00010317
WBGene00010326
WBGene00010419
WBGene00010425
WBGene00010454
WBGene00010456
WBGene00010478
WBGene00010502
WBGene00010503
WBGene00010556
WBGene00010621
WBGene00010627
WBGene00010661
WBGene00010664
WBGene00010665
WBGene00010667
WBGene00010677
WBGene00010697
WBGene00010700
WBGene00010755
WBGene00010759
WBGene00010809
WBGene00010834
WBGene00010867
WBGene00010868
WBGene00010889
WBGene00010941
WBGene00010988
WBGene00011042
WBGene00011059
WBGene00011110
WBGene00011116
WBGene00011128
WBGene00011146
WBGene00011230
WBGene00011232
WBGene00011235
WBGene00011263
WBGene00011273
WBGene00011278
WBGene00011300
WBGene00011304
WBGene00011393
WBGene00011398
WBGene00011404
WBGene00011436
WBGene00011480
WBGene00011481
WBGene00011522
WBGene00011529
WBGene00011662
WBGene00011679
WBGene00011729
WBGene00011737
WBGene00011760
WBGene00011763
WBGene00011768
WBGene00011773
WBGene00011775
WBGene00011820
WBGene00011831
WBGene00011849
WBGene00011850
WBGene00011867
WBGene00011883
WBGene00011884
WBGene00011891
WBGene00011977
WBGene00012033
WBGene00012085
WBGene00012118
WBGene00012149
WBGene00012256
WBGene00012261
WBGene00012317
WBGene00012343
WBGene00012376
WBGene00012443
WBGene00012463
WBGene00012471
WBGene00012546
WBGene00012553
WBGene00012717
WBGene00012762
WBGene00012768
WBGene00012769
WBGene00012999
WBGene00013025
WBGene00013034
WBGene00013106
WBGene00013139
WBGene00013311
WBGene00013352
WBGene00013461
WBGene00013462
WBGene00013463
WBGene00013489
WBGene00013560
WBGene00013575
WBGene00013578
WBGene00013591
WBGene00013672
WBGene00013709
WBGene00013736
WBGene00013766
WBGene00013859
WBGene00013866
WBGene00013878
WBGene00013924
WBGene00013926
WBGene00013985
WBGene00014012
WBGene00014025
WBGene00014058
WBGene00014095
WBGene00014098
WBGene00014115
WBGene00014148
WBGene00014172
WBGene00014173
WBGene00014202
WBGene00014300
WBGene00015002
WBGene00015007
WBGene00015046
WBGene00015056
WBGene00015064
WBGene00015143
WBGene00015156
WBGene00015163
WBGene00015207
WBGene00015285
WBGene00015294
WBGene00015332
WBGene00015410
WBGene00015464
WBGene00015512
WBGene00015514
WBGene00015545
WBGene00015547
WBGene00015676
WBGene00015802
WBGene00015809
WBGene00015943
WBGene00016006
WBGene00016011
WBGene00016018
WBGene00016103
WBGene00016133
WBGene00016195
WBGene00016201
WBGene00016264
WBGene00016355
WBGene00016415
WBGene00016417
WBGene00016419
WBGene00016422
WBGene00016493
WBGene00016495
WBGene00016496
WBGene00016499
WBGene00016505
[truncated: 137,777 more rows]

## Sheet: C
Combination of intestinal transcribed genes from alternative methods used
RAPID|FANS|PATseq	RAPID|FACS|PATseq	FANS|FACS|PATseq	RAPID|FANS|FACS|PATseq
WBGene00000007	WBGene00000022	WBGene00000017	WBGene00000001
WBGene00000073	WBGene00000081	WBGene00000018	WBGene00000004
WBGene00000075	WBGene00000088	WBGene00000020	WBGene00000036
WBGene00000084	WBGene00000147	WBGene00000063	WBGene00000040
WBGene00000139	WBGene00000163	WBGene00000065	WBGene00000041
WBGene00000375	WBGene00000169	WBGene00000068	WBGene00000067
WBGene00000412	WBGene00000181	WBGene00000070	WBGene00000074
WBGene00000539	WBGene00000219	WBGene00000083	WBGene00000080
WBGene00000803	WBGene00000239	WBGene00000086	WBGene00000093
WBGene00000870	WBGene00000281	WBGene00000092	WBGene00000094
WBGene00000923	WBGene00000393	WBGene00000097	WBGene00000100
WBGene00000968	WBGene00000411	WBGene00000098	WBGene00000101
WBGene00001158	WBGene00000443	WBGene00000099	WBGene00000105
WBGene00001248	WBGene00000480	WBGene00000102	WBGene00000106
WBGene00001468	WBGene00000500	WBGene00000103	WBGene00000107
WBGene00001477	WBGene00000508	WBGene00000111	WBGene00000109
WBGene00001867	WBGene00000515	WBGene00000113	WBGene00000110
WBGene00001997	WBGene00000527	WBGene00000115	WBGene00000114
WBGene00002124	WBGene00000534	WBGene00000120	WBGene00000117
WBGene00002299	WBGene00000549	WBGene00000121	WBGene00000118
WBGene00002804	WBGene00000552	WBGene00000138	WBGene00000122
WBGene00003094	WBGene00000584	WBGene00000144	WBGene00000123
WBGene00003136	WBGene00000693	WBGene00000148	WBGene00000136
WBGene00003233	WBGene00000754	WBGene00000150	WBGene00000140
WBGene00003572	WBGene00000761	WBGene00000156	WBGene00000142
WBGene00003612	WBGene00000764	WBGene00000157	WBGene00000145
WBGene00003670	WBGene00000783	WBGene00000161	WBGene00000149
WBGene00003686	WBGene00000834	WBGene00000164	WBGene00000155
WBGene00003699	WBGene00000863	WBGene00000165	WBGene00000158
WBGene00003700	WBGene00000869	WBGene00000170	WBGene00000160
WBGene00003705	WBGene00000879	WBGene00000184	WBGene00000172
WBGene00003715	WBGene00000883	WBGene00000186	WBGene00000178
WBGene00003719	WBGene00000897	WBGene00000188	WBGene00000179
WBGene00003757	WBGene00000913	WBGene00000190	WBGene00000180
WBGene00003835	WBGene00000976	WBGene00000192	WBGene00000182
WBGene00004193	WBGene00001008	WBGene00000195	WBGene00000183
WBGene00004353	WBGene00001036	WBGene00000196	WBGene00000187
WBGene00004777	WBGene00001038	WBGene00000197	WBGene00000189
WBGene00004893	WBGene00001056	WBGene00000199	WBGene00000198
WBGene00004959	WBGene00001080	WBGene00000200	WBGene00000207
WBGene00005021	WBGene00001081	WBGene00000201	WBGene00000209
WBGene00005189	WBGene00001090	WBGene00000203	WBGene00000214
WBGene00005712	WBGene00001156	WBGene00000204	WBGene00000215
WBGene00006272	WBGene00001163	WBGene00000205	WBGene00000216
WBGene00006464	WBGene00001167	WBGene00000206	WBGene00000217
WBGene00006466	WBGene00001172	WBGene00000210	WBGene00000218
WBGene00006696	WBGene00001179	WBGene00000235	WBGene00000221
WBGene00006971	WBGene00001196	WBGene00000236	WBGene00000222
WBGene00007131	WBGene00001209	WBGene00000237	WBGene00000223
WBGene00007152	WBGene00001239	WBGene00000238	WBGene00000224
WBGene00007220	WBGene00001243	WBGene00000240	WBGene00000225
WBGene00007322	WBGene00001258	WBGene00000248	WBGene00000226
WBGene00007392	WBGene00001333	WBGene00000249	WBGene00000229
WBGene00007417	WBGene00001405	WBGene00000253	WBGene00000230
WBGene00007453	WBGene00001527	WBGene00000254	WBGene00000231
WBGene00007536	WBGene00001580	WBGene00000262	WBGene00000245
WBGene00007548	WBGene00001596	WBGene00000263	WBGene00000247
WBGene00007675	WBGene00001602	WBGene00000266	WBGene00000271
WBGene00007691	WBGene00001604	WBGene00000268	WBGene00000276
WBGene00007716	WBGene00001620	WBGene00000275	WBGene00000282
WBGene00007724	WBGene00001661	WBGene00000277	WBGene00000293
WBGene00007771	WBGene00001679	WBGene00000283	WBGene00000366
WBGene00007840	WBGene00001748	WBGene00000289	WBGene00000369
WBGene00007856	WBGene00001758	WBGene00000292	WBGene00000377
WBGene00007867	WBGene00001817	WBGene00000302	WBGene00000378
WBGene00007906	WBGene00001827	WBGene00000370	WBGene00000379
WBGene00007963	WBGene00001832	WBGene00000376	WBGene00000381
WBGene00007973	WBGene00001853	WBGene00000380	WBGene00000421
WBGene00008017	WBGene00001854	WBGene00000382	WBGene00000458
WBGene00008099	WBGene00001994	WBGene00000386	WBGene00000459
WBGene00008246	WBGene00002004	WBGene00000387	WBGene00000472
WBGene00008263	WBGene00002026	WBGene00000391	WBGene00000479
WBGene00008309	WBGene00002027	WBGene00000405	WBGene00000482
WBGene00008352	WBGene00002061	WBGene00000409	WBGene00000516
WBGene00008353	WBGene00002067	WBGene00000410	WBGene00000532
WBGene00008407	WBGene00002068	WBGene00000414	WBGene00000542
WBGene00008483	WBGene00002070	WBGene00000415	WBGene00000548
WBGene00008485	WBGene00002076	WBGene00000420	WBGene00000550
WBGene00008593	WBGene00002176	WBGene00000424	WBGene00000585
WBGene00008595	WBGene00002191	WBGene00000426	WBGene00000591
WBGene00008629	WBGene00002201	WBGene00000464	WBGene00000704
WBGene00008692	WBGene00002250	WBGene00000466	WBGene00000766
WBGene00008709	WBGene00002850	WBGene00000473	WBGene00000773
WBGene00008730	WBGene00002891	WBGene00000474	WBGene00000776
WBGene00008774	WBGene00002980	WBGene00000475	WBGene00000781
WBGene00008830	WBGene00003014	WBGene00000476	WBGene00000784
WBGene00008849	WBGene00003034	WBGene00000496	WBGene00000785
WBGene00008871	WBGene00003036	WBGene00000502	WBGene00000786
WBGene00008891	WBGene00003059	WBGene00000506	WBGene00000788
WBGene00008945	WBGene00003096	WBGene00000507	WBGene00000789
WBGene00008976	WBGene00003234	WBGene00000511	WBGene00000793
WBGene00009156	WBGene00003236	WBGene00000517	WBGene00000799
WBGene00009190	WBGene00003374	WBGene00000522	WBGene00000800
WBGene00009212	WBGene00003413	WBGene00000528	WBGene00000802
WBGene00009258	WBGene00003480	WBGene00000530	WBGene00000831
WBGene00009329	WBGene00003583	WBGene00000533	WBGene00000833
WBGene00009335	WBGene00003592	WBGene00000535	WBGene00000835
WBGene00009395	WBGene00003605	WBGene00000536	WBGene00000840
WBGene00009403	WBGene00003640	WBGene00000543	WBGene00000843
WBGene00009490	WBGene00003692	WBGene00000545	WBGene00000846
WBGene00009495	WBGene00003709	WBGene00000547	WBGene00000871
WBGene00009522	WBGene00003725	WBGene00000553	WBGene00000876
WBGene00009560	WBGene00003767	WBGene00000554	WBGene00000881
WBGene00009696	WBGene00003902	WBGene00000558	WBGene00000882
WBGene00009840	WBGene00003903	WBGene00000564	WBGene00000889
WBGene00009854	WBGene00003963	WBGene00000565	WBGene00000894
WBGene00010062	WBGene00004003	WBGene00000566	WBGene00000899
WBGene00010068	WBGene00004037	WBGene00000567	WBGene00000901
WBGene00010134	WBGene00004038	WBGene00000603	WBGene00000904
WBGene00010189	WBGene00004055	WBGene00000615	WBGene00000911
WBGene00010215	WBGene00004059	WBGene00000616	WBGene00000912
WBGene00010229	WBGene00004062	WBGene00000691	WBGene00000914
WBGene00010256	WBGene00004095	WBGene00000699	WBGene00000915
WBGene00010328	WBGene00004134	WBGene00000712	WBGene00000917
WBGene00010522	WBGene00004140	WBGene00000720	WBGene00000938
WBGene00010572	WBGene00004143	WBGene00000730	WBGene00000962
WBGene00010619	WBGene00004189	WBGene00000732	WBGene00000967
WBGene00010628	WBGene00004204	WBGene00000740	WBGene00000975
WBGene00010644	WBGene00004235	WBGene00000751	WBGene00000981
WBGene00010686	WBGene00004238	WBGene00000757	WBGene00000984
WBGene00010851	WBGene00004248	WBGene00000762	WBGene00000991
WBGene00010899	WBGene00004347	WBGene00000763	WBGene00000996
WBGene00011052	WBGene00004382	WBGene00000777	WBGene00001005
WBGene00011100	WBGene00004384	WBGene00000779	WBGene00001006
WBGene00011134	WBGene00004408	WBGene00000794	WBGene00001007
WBGene00011141	WBGene00004461	WBGene00000796	WBGene00001017
WBGene00011167	WBGene00004466	WBGene00000812	WBGene00001019
WBGene00011209	WBGene00004503	WBGene00000814	WBGene00001023
WBGene00011217	WBGene00004753	WBGene00000815	WBGene00001025
WBGene00011262	WBGene00004754	WBGene00000816	WBGene00001026
WBGene00011321	WBGene00004783	WBGene00000822	WBGene00001030
WBGene00011361	WBGene00004875	WBGene00000836	WBGene00001031
WBGene00011364	WBGene00004887	WBGene00000837	WBGene00001034
WBGene00011397	WBGene00004897	WBGene00000838	WBGene00001037
WBGene00011430	WBGene00004912	WBGene00000839	WBGene00001039
WBGene00011678	WBGene00004928	WBGene00000841	WBGene00001043
WBGene00011725	WBGene00004974	WBGene00000854	WBGene00001047
WBGene00011808	WBGene00006324	WBGene00000865	WBGene00001058
WBGene00011852	WBGene00006437	WBGene00000868	WBGene00001073
WBGene00011893	WBGene00006443	WBGene00000872	WBGene00001086
WBGene00011914	WBGene00006476	WBGene00000874	WBGene00001089
WBGene00011984	WBGene00006495	WBGene00000884	WBGene00001093
WBGene00012014	WBGene00006513	WBGene00000887	WBGene00001099
WBGene00012026	WBGene00006514	WBGene00000888	WBGene00001130
WBGene00012070	WBGene00006515	WBGene00000890	WBGene00001134
WBGene00012162	WBGene00006530	WBGene00000891	WBGene00001137
WBGene00012404	WBGene00006542	WBGene00000892	WBGene00001149
WBGene00012408	WBGene00006599	WBGene00000896	WBGene00001155
WBGene00012491	WBGene00006706	WBGene00000898	WBGene00001157
WBGene00012533	WBGene00006707	WBGene00000900	WBGene00001160
WBGene00012582	WBGene00006718	WBGene00000908	WBGene00001166
WBGene00013052	WBGene00006725	WBGene00000929	WBGene00001168
WBGene00013091	WBGene00006747	WBGene00000931	WBGene00001169
WBGene00013111	WBGene00006753	WBGene00000937	WBGene00001173
WBGene00013146	WBGene00006776	WBGene00000941	WBGene00001177
WBGene00013569	WBGene00006777	WBGene00000958	WBGene00001178
WBGene00013609	WBGene00006796	WBGene00000959	WBGene00001189
WBGene00013643	WBGene00006831	WBGene00000961	WBGene00001193
WBGene00013750	WBGene00006896	WBGene00000963	WBGene00001194
WBGene00013762	WBGene00006912	WBGene00000970	WBGene00001225
WBGene00013836	WBGene00006924	WBGene00000973	WBGene00001226
WBGene00013839	WBGene00006931	WBGene00000983	WBGene00001227
WBGene00013904	WBGene00006940	WBGene00000985	WBGene00001228
WBGene00013905	WBGene00006968	WBGene00000988	WBGene00001234
WBGene00013963	WBGene00007047	WBGene00000992	WBGene00001240
WBGene00014089	WBGene00007053	WBGene00001000	WBGene00001241
WBGene00014106	WBGene00007058	WBGene00001001	WBGene00001244
WBGene00015081	WBGene00007107	WBGene00001018	WBGene00001247
WBGene00015369	WBGene00007108	WBGene00001022	WBGene00001250
WBGene00015371	WBGene00007194	WBGene00001027	WBGene00001259
WBGene00015378	WBGene00007197	WBGene00001028	WBGene00001262
WBGene00015382	WBGene00007221	WBGene00001032	WBGene00001303
WBGene00015471	WBGene00007287	WBGene00001033	WBGene00001309
WBGene00015569	WBGene00007336	WBGene00001040	WBGene00001320
WBGene00015859	WBGene00007355	WBGene00001041	WBGene00001329
WBGene00015861	WBGene00007436	WBGene00001042	WBGene00001330
WBGene00015922	WBGene00007504	WBGene00001048	WBGene00001335
WBGene00016005	WBGene00007533	WBGene00001051	WBGene00001337
WBGene00016046	WBGene00007564	WBGene00001060	WBGene00001338
WBGene00016131	WBGene00007586	WBGene00001066	WBGene00001340
WBGene00016164	WBGene00007587	WBGene00001074	WBGene00001345
WBGene00016191	WBGene00007680	WBGene00001078	WBGene00001358
WBGene00016314	WBGene00007702	WBGene00001082	WBGene00001372
WBGene00016336	WBGene00007703	WBGene00001087	WBGene00001393
WBGene00016585	WBGene00008052	WBGene00001088	WBGene00001394
WBGene00016590	WBGene00008119	WBGene00001101	WBGene00001395
WBGene00016613	WBGene00008121	WBGene00001113	WBGene00001396
WBGene00016734	WBGene00008205	WBGene00001151	WBGene00001398
WBGene00016758	WBGene00008219	WBGene00001153	WBGene00001403
WBGene00016766	WBGene00008220	WBGene00001161	WBGene00001412
WBGene00016809	WBGene00008354	WBGene00001186	WBGene00001423
WBGene00016884	WBGene00008404	WBGene00001187	WBGene00001426
WBGene00016970	WBGene00008419	WBGene00001208	WBGene00001427
WBGene00017074	WBGene00008429	WBGene00001229	WBGene00001431
WBGene00017077	WBGene00008456	WBGene00001230	WBGene00001466
WBGene00017091	WBGene00008530	WBGene00001231	WBGene00001480
WBGene00017093	WBGene00008547	WBGene00001232	WBGene00001486
WBGene00017164	WBGene00008582	WBGene00001233	WBGene00001493
WBGene00017178	WBGene00008622	WBGene00001235	WBGene00001496
WBGene00017237	WBGene00008664	WBGene00001236	WBGene00001497
WBGene00017310	WBGene00008682	WBGene00001249	WBGene00001498
WBGene00017327	WBGene00008687	WBGene00001251	WBGene00001501
WBGene00017364	WBGene00008688	WBGene00001324	WBGene00001502
WBGene00017398	WBGene00008923	WBGene00001325	WBGene00001503
WBGene00017449	WBGene00009008	WBGene00001331	WBGene00001506
WBGene00017498	WBGene00009064	WBGene00001334	WBGene00001508
WBGene00017501	WBGene00009126	WBGene00001336	WBGene00001510
WBGene00017578	WBGene00009207	WBGene00001365	WBGene00001523
WBGene00017625	WBGene00009272	WBGene00001366	WBGene00001526
WBGene00017635	WBGene00009374	WBGene00001371	WBGene00001538
WBGene00017678	WBGene00009393	WBGene00001386	WBGene00001558
WBGene00017679	WBGene00009552	WBGene00001389	WBGene00001561
WBGene00017756	WBGene00009584	WBGene00001391	WBGene00001562
WBGene00017785	WBGene00009628	WBGene00001397	WBGene00001564
WBGene00017947	WBGene00009667	WBGene00001404	WBGene00001568
WBGene00017954	WBGene00009769	WBGene00001406	WBGene00001570
WBGene00018140	WBGene00009770	WBGene00001425	WBGene00001574
WBGene00018153	WBGene00009772	WBGene00001439	WBGene00001581
WBGene00018195	WBGene00009776	WBGene00001441	WBGene00001582
WBGene00018200	WBGene00009831	WBGene00001444	WBGene00001606
WBGene00018281	WBGene00009925	WBGene00001445	WBGene00001630
WBGene00018282	WBGene00009987	WBGene00001446	WBGene00001635
WBGene00018351	WBGene00009992	WBGene00001447	WBGene00001638
WBGene00018848	WBGene00010035	WBGene00001448	WBGene00001648
WBGene00018886	WBGene00010044	WBGene00001451	WBGene00001649
WBGene00018907	WBGene00010055	WBGene00001452	WBGene00001651
WBGene00018931	WBGene00010079	WBGene00001453	WBGene00001682
WBGene00019215	WBGene00010097	WBGene00001454	WBGene00001684
WBGene00019444	WBGene00010259	WBGene00001455	WBGene00001685
WBGene00019493	WBGene00010260	WBGene00001459	WBGene00001708
WBGene00019519	WBGene00010357	WBGene00001460	WBGene00001743
WBGene00019549	WBGene00010435	WBGene00001461	WBGene00001744
WBGene00019579	WBGene00010450	WBGene00001462	WBGene00001747
WBGene00019589	WBGene00010458	WBGene00001464	WBGene00001749
WBGene00019618	WBGene00010478	WBGene00001470	WBGene00001754
WBGene00019659	WBGene00010503	WBGene00001476	WBGene00001768
WBGene00019763	WBGene00010621	WBGene00001481	WBGene00001770
WBGene00019806	WBGene00010638	WBGene00001488	WBGene00001772
WBGene00019869	WBGene00010677	WBGene00001489	WBGene00001774
WBGene00019962	WBGene00010750	WBGene00001491	WBGene00001775
WBGene00020188	WBGene00010796	WBGene00001505	WBGene00001784
WBGene00020329	WBGene00010811	WBGene00001509	WBGene00001794
WBGene00020359	WBGene00010814	WBGene00001513	WBGene00001795
WBGene00020453	WBGene00010842	WBGene00001516	WBGene00001812
WBGene00020502	WBGene00010875	WBGene00001520	WBGene00001814
WBGene00020823	WBGene00010941	WBGene00001559	WBGene00001819
WBGene00020967	WBGene00011059	WBGene00001577	WBGene00001840
WBGene00020989	WBGene00011109	WBGene00001578	WBGene00001843
WBGene00021051	WBGene00011110	WBGene00001584	WBGene00001851
WBGene00021070	WBGene00011145	WBGene00001585	WBGene00001955
WBGene00021116	WBGene00011182	WBGene00001591	WBGene00001974
WBGene00021159	WBGene00011216	WBGene00001595	WBGene00001977
WBGene00021160	WBGene00011225	WBGene00001607	WBGene00001979
WBGene00021256	WBGene00011263	WBGene00001628	WBGene00001983
WBGene00021339	WBGene00011283	WBGene00001629	WBGene00001993
WBGene00021495	WBGene00011302	WBGene00001632	WBGene00001999
WBGene00021531	WBGene00011348	WBGene00001647	WBGene00002000
WBGene00021603	WBGene00011353	WBGene00001662	WBGene00002001
WBGene00021751	WBGene00011437	WBGene00001669	WBGene00002005
WBGene00021865	WBGene00011482	WBGene00001678	WBGene00002007
WBGene00022326	WBGene00011489	WBGene00001680	WBGene00002008
WBGene00022330	WBGene00011490	WBGene00001694	WBGene00002010
WBGene00022337	WBGene00011526	WBGene00001699	WBGene00002025
WBGene00022338	WBGene00011532	WBGene00001713	WBGene00002035
WBGene00022345	WBGene00011538	WBGene00001714	WBGene00002036
WBGene00022411	WBGene00011662	WBGene00001740	WBGene00002037
WBGene00022549	WBGene00011729	WBGene00001746	WBGene00002038
WBGene00022698	WBGene00011739	WBGene00001752	WBGene00002041
WBGene00022735	WBGene00011819	WBGene00001755	WBGene00002043
WBGene00022857	WBGene00011820	WBGene00001776	WBGene00002044
WBGene00022868	WBGene00011835	WBGene00001791	WBGene00002045
WBGene00023484	WBGene00011883	WBGene00001793	WBGene00002046
WBGene00044236	WBGene00011884	WBGene00001808	WBGene00002048
WBGene00044330	WBGene00011955	WBGene00001813	WBGene00002053
WBGene00044331	WBGene00012019	WBGene00001823	WBGene00002054
WBGene00044455	WBGene00012121	WBGene00001824	WBGene00002055
WBGene00044570	WBGene00012127	WBGene00001836	WBGene00002056
WBGene00044637	WBGene00012179	WBGene00001837	WBGene00002057
WBGene00044674	WBGene00012194	WBGene00001844	WBGene00002058
WBGene00044707	WBGene00012204	WBGene00001855	WBGene00002065
WBGene00044977	WBGene00012330	WBGene00001975	WBGene00002066
WBGene00045356	WBGene00012343	WBGene00001976	WBGene00002071
WBGene00045415	WBGene00012361	WBGene00001978	WBGene00002074
WBGene00050904	WBGene00012370	WBGene00001980	WBGene00002077
WBGene00077548	WBGene00012395	WBGene00001986	WBGene00002078
WBGene00077696	WBGene00012528	WBGene00001995	WBGene00002080
	WBGene00012553	WBGene00001996	WBGene00002081
	WBGene00012648	WBGene00002002	WBGene00002083
	WBGene00012659	WBGene00002003	WBGene00002137
	WBGene00012830	WBGene00002012	WBGene00002138
	WBGene00012989	WBGene00002016	WBGene00002139
	WBGene00012999	WBGene00002018	WBGene00002152
	WBGene00013001	WBGene00002023	WBGene00002162
	WBGene00013018	WBGene00002024	WBGene00002173
	WBGene00013040	WBGene00002039	WBGene00002174
	WBGene00013093	WBGene00002059	WBGene00002175
	WBGene00013118	WBGene00002060	WBGene00002183
	WBGene00013143	WBGene00002064	WBGene00002185
	WBGene00013216	WBGene00002072	WBGene00002187
	WBGene00013224	WBGene00002073	WBGene00002196
	WBGene00013273	WBGene00002079	WBGene00002202
	WBGene00013284	WBGene00002097	WBGene00002207
	WBGene00013325	WBGene00002101	WBGene00002210
	WBGene00013463	WBGene00002109	WBGene00002215
	WBGene00013567	WBGene00002110	WBGene00002217
	WBGene00013575	WBGene00002123	WBGene00002223
	WBGene00013576	WBGene00002135	WBGene00002231
	WBGene00013650	WBGene00002147	WBGene00002232
	WBGene00013668	WBGene00002148	WBGene00002238
	WBGene00013682	WBGene00002179	WBGene00002244
	WBGene00013683	WBGene00002189	WBGene00002249
	WBGene00013766	WBGene00002190	WBGene00002251
	WBGene00013847	WBGene00002192	WBGene00002256
	WBGene00013878	WBGene00002198	WBGene00002257
	WBGene00013880	WBGene00002203	WBGene00002258
	WBGene00013983	WBGene00002213	WBGene00002264
	WBGene00013994	WBGene00002219	WBGene00002269
	WBGene00014023	WBGene00002222	WBGene00002271
	WBGene00014024	WBGene00002225	WBGene00002272
	WBGene00014091	WBGene00002229	WBGene00002273
	WBGene00014136	WBGene00002240	WBGene00002274
	WBGene00014165	WBGene00002241	WBGene00002295
	WBGene00014172	WBGene00002245	WBGene00002344
	WBGene00014250	WBGene00002253	WBGene00002583
	WBGene00015010	WBGene00002254	WBGene00002632
	WBGene00015047	WBGene00002255	WBGene00002637
	WBGene00015094	WBGene00002259	WBGene00002717
	WBGene00015101	WBGene00002261	WBGene00002783
	WBGene00015164	WBGene00002268	WBGene00002845
	WBGene00015207	WBGene00002276	WBGene00002855
	WBGene00015235	WBGene00002348	WBGene00002879
	WBGene00015308	WBGene00002363	WBGene00002889
	WBGene00015391	WBGene00002694	WBGene00002979
	WBGene00015413	WBGene00002696	WBGene00002990
	WBGene00015451	WBGene00002978	WBGene00002999
	WBGene00015468	WBGene00002981	WBGene00003002
	WBGene00015470	WBGene00002982	WBGene00003009
	WBGene00015477	WBGene00002985	WBGene00003020
	WBGene00015485	WBGene00002986	WBGene00003021
	WBGene00015512	WBGene00002991	WBGene00003030
	WBGene00015524	WBGene00002996	WBGene00003035
	WBGene00015635	WBGene00002998	WBGene00003037
	WBGene00015742	WBGene00003000	WBGene00003040
	WBGene00015743	WBGene00003007	WBGene00003052
	WBGene00015809	WBGene00003010	WBGene00003053
	WBGene00015915	WBGene00003019	WBGene00003061
	WBGene00015916	WBGene00003026	WBGene00003063
	WBGene00016002	WBGene00003041	WBGene00003064
	WBGene00016045	WBGene00003043	WBGene00003073
	WBGene00016156	WBGene00003047	WBGene00003082
	WBGene00016170	WBGene00003048	WBGene00003083
	WBGene00016194	WBGene00003055	WBGene00003084
	WBGene00016463	WBGene00003056	WBGene00003085
	WBGene00016493	WBGene00003062	WBGene00003086
	WBGene00016494	WBGene00003066	WBGene00003090
	WBGene00016610	WBGene00003076	WBGene00003091
	WBGene00016623	WBGene00003079	WBGene00003093
	WBGene00016653	WBGene00003087	WBGene00003097
	WBGene00016750	WBGene00003092	WBGene00003123
	WBGene00016803	WBGene00003111	WBGene00003130
	WBGene00016964	WBGene00003129	WBGene00003132
	WBGene00016968	WBGene00003144	WBGene00003153
	WBGene00016977	WBGene00003148	WBGene00003156
	WBGene00017016	WBGene00003149	WBGene00003160
	WBGene00017062	WBGene00003150	WBGene00003177
	WBGene00017108	WBGene00003158	WBGene00003214
	WBGene00017244	WBGene00003161	WBGene00003218
	WBGene00017261	WBGene00003162	WBGene00003247
	WBGene00017272	WBGene00003163	WBGene00003258
	WBGene00017283	WBGene00003164	WBGene00003367
	WBGene00017302	WBGene00003172	WBGene00003372
	WBGene00017429	WBGene00003175	WBGene00003378
	WBGene00017431	WBGene00003182	WBGene00003390
	WBGene00017437	WBGene00003184	WBGene00003391
	WBGene00017547	WBGene00003185	WBGene00003393
	WBGene00017640	WBGene00003196	WBGene00003400
	WBGene00017663	WBGene00003210	WBGene00003407
	WBGene00017691	WBGene00003221	WBGene00003409
	WBGene00017759	WBGene00003224	WBGene00003411
	WBGene00017769	WBGene00003225	WBGene00003472
	WBGene00017800	WBGene00003228	WBGene00003476
	WBGene00017889	WBGene00003230	WBGene00003495
	WBGene00017904	WBGene00003239	WBGene00003508
	WBGene00017908	WBGene00003242	WBGene00003559
	WBGene00017962	WBGene00003243	WBGene00003564
	WBGene00018007	WBGene00003253	WBGene00003586
	WBGene00018072	WBGene00003368	WBGene00003593
	WBGene00018131	WBGene00003369	WBGene00003596
	WBGene00018160	WBGene00003370	WBGene00003598
	WBGene00018249	WBGene00003371	WBGene00003609
	WBGene00018270	WBGene00003373	WBGene00003613
	WBGene00018286	WBGene00003375	WBGene00003616
	WBGene00018328	WBGene00003389	WBGene00003621
	WBGene00018339	WBGene00003401	WBGene00003625
	WBGene00018342	WBGene00003402	WBGene00003626
	WBGene00018488	WBGene00003415	WBGene00003628
	WBGene00018512	WBGene00003423	WBGene00003635
	WBGene00018582	WBGene00003431	WBGene00003636
	WBGene00018594	WBGene00003464	WBGene00003639
	WBGene00018788	WBGene00003473	WBGene00003645
	WBGene00018814	WBGene00003477	WBGene00003654
	WBGene00018846	WBGene00003478	WBGene00003656
	WBGene00018898	WBGene00003509	WBGene00003658
	WBGene00018921	WBGene00003511	WBGene00003659
	WBGene00018955	WBGene00003514	WBGene00003661
	WBGene00018959	WBGene00003515	WBGene00003669
	WBGene00018963	WBGene00003518	WBGene00003674
	WBGene00018990	WBGene00003561	WBGene00003676
	WBGene00019017	WBGene00003567	WBGene00003678
	WBGene00019060	WBGene00003568	WBGene00003687
	WBGene00019162	WBGene00003577	WBGene00003691
	WBGene00019188	WBGene00003581	WBGene00003694
	WBGene00019295	WBGene00003582	WBGene00003695
	WBGene00019322	WBGene00003587	WBGene00003704
	WBGene00019479	WBGene00003589	WBGene00003728
	WBGene00019619	WBGene00003594	WBGene00003730
	WBGene00019657	WBGene00003600	WBGene00003735
	WBGene00019658	WBGene00003602	WBGene00003738
	WBGene00019717	WBGene00003607	WBGene00003751
	WBGene00019805	WBGene00003610	WBGene00003773
	WBGene00019847	WBGene00003617	WBGene00003779
	WBGene00019871	WBGene00003618	WBGene00003786
	WBGene00019877	WBGene00003620	WBGene00003793
	WBGene00019883	WBGene00003624	WBGene00003794
	WBGene00019947	WBGene00003627	WBGene00003795
	WBGene00019955	WBGene00003630	WBGene00003796
	WBGene00019959	WBGene00003638	WBGene00003798
	WBGene00020037	WBGene00003647	WBGene00003799
	WBGene00020097	WBGene00003648	WBGene00003800
	WBGene00020139	WBGene00003652	WBGene00003804
	WBGene00020185	WBGene00003668	WBGene00003813
	WBGene00020230	WBGene00003688	WBGene00003815
	WBGene00020264	WBGene00003690	WBGene00003818
	WBGene00020269	WBGene00003697	WBGene00003825
	WBGene00020442	WBGene00003707	WBGene00003827
	WBGene00020491	WBGene00003710	WBGene00003830
	WBGene00020530	WBGene00003712	WBGene00003834
	WBGene00020549	WBGene00003720	WBGene00003844
	WBGene00020696	WBGene00003724	WBGene00003846
	WBGene00020779	WBGene00003733	WBGene00003851
	WBGene00020838	WBGene00003739	WBGene00003858
	WBGene00020952	WBGene00003741	WBGene00003868
	WBGene00021082	WBGene00003743	WBGene00003877
	WBGene00021170	WBGene00003744	WBGene00003901
	WBGene00021208	WBGene00003745	WBGene00003904
	WBGene00021331	WBGene00003747	WBGene00003912
	WBGene00021367	WBGene00003750	WBGene00003915
	WBGene00021369	WBGene00003752	WBGene00003916
	WBGene00021392	WBGene00003753	WBGene00003918
	WBGene00021423	WBGene00003758	WBGene00003920
	WBGene00021440	WBGene00003762	WBGene00003925
	WBGene00021469	WBGene00003763	WBGene00003926
	WBGene00021518	WBGene00003769	WBGene00003931
	WBGene00021522	WBGene00003771	WBGene00003932
	WBGene00021715	WBGene00003776	WBGene00003941
	WBGene00021763	WBGene00003787	WBGene00003943
	WBGene00021816	WBGene00003788	WBGene00003948
	WBGene00021869	WBGene00003790	WBGene00003949
	WBGene00021879	WBGene00003792	WBGene00003951
	WBGene00021899	WBGene00003805	WBGene00003953
	WBGene00022059	WBGene00003806	WBGene00003956
	WBGene00022060	WBGene00003826	WBGene00003957
	WBGene00022100	WBGene00003828	WBGene00003958
	WBGene00022139	WBGene00003836	WBGene00003962
	WBGene00022181	WBGene00003843	WBGene00003964
	WBGene00022252	WBGene00003865	WBGene00003967
	WBGene00022361	WBGene00003870	WBGene00003980
	WBGene00022389	WBGene00003891	WBGene00003982
	WBGene00022410	WBGene00003893	WBGene00003986
	WBGene00022434	WBGene00003905	WBGene00003995
	WBGene00022457	WBGene00003907	WBGene00003999
	WBGene00022466	WBGene00003911	WBGene00004013
	WBGene00022574	WBGene00003917	WBGene00004014
	WBGene00022599	WBGene00003921	WBGene00004015
	WBGene00022608	WBGene00003922	WBGene00004020
	WBGene00022748	WBGene00003923	WBGene00004023
	WBGene00022749	WBGene00003924	WBGene00004024
	WBGene00022766	WBGene00003927	WBGene00004033
	WBGene00022775	WBGene00003934	WBGene00004034
	WBGene00022782	WBGene00003936	WBGene00004040
	WBGene00022812	WBGene00003947	WBGene00004042
	WBGene00022861	WBGene00003950	WBGene00004053
	WBGene00022882	WBGene00003952	WBGene00004058
	WBGene00023497	WBGene00003955	WBGene00004060
	WBGene00043097	WBGene00003968	WBGene00004061
	WBGene00044071	WBGene00003970	WBGene00004068
	WBGene00044144	WBGene00003975	WBGene00004075
	WBGene00044410	WBGene00003978	WBGene00004076
	WBGene00044418	WBGene00003989	WBGene00004086
	WBGene00044483	WBGene00003990	WBGene00004089
	WBGene00044488	WBGene00003996	WBGene00004091
	WBGene00044689	WBGene00004016	WBGene00004093
	WBGene00045272	WBGene00004029	WBGene00004096
	WBGene00045433	WBGene00004032	WBGene00004105
	WBGene00045468	WBGene00004046	WBGene00004109
	WBGene00077526	WBGene00004049	WBGene00004110
	WBGene00077593	WBGene00004056	WBGene00004111
	WBGene00077761	WBGene00004057	WBGene00004117
	WBGene00119204	WBGene00004063	WBGene00004131
	WBGene00175030	WBGene00004064	WBGene00004132
	WBGene00194695	WBGene00004078	WBGene00004147
	WBGene00194708	WBGene00004083	WBGene00004148
	WBGene00194986	WBGene00004085	WBGene00004152
	WBGene00195176	WBGene00004087	WBGene00004167
	WBGene00206380	WBGene00004088	WBGene00004169
	WBGene00219216	WBGene00004116	WBGene00004175
	WBGene00219316	WBGene00004121	WBGene00004182
	WBGene00235102	WBGene00004128	WBGene00004185
	WBGene00235269	WBGene00004136	WBGene00004186
	WBGene00235315	WBGene00004138	WBGene00004187
		WBGene00004139	WBGene00004196
		WBGene00004151	WBGene00004199
		WBGene00004164	WBGene00004208
		WBGene00004166	WBGene00004214
		WBGene00004172	WBGene00004245
		WBGene00004180	WBGene00004254
		WBGene00004183	WBGene00004258
		WBGene00004194	WBGene00004259
		WBGene00004195	WBGene00004269
		WBGene00004198	WBGene00004272
		WBGene00004201	WBGene00004279
		WBGene00004203	WBGene00004302
		WBGene00004206	WBGene00004303
		WBGene00004207	WBGene00004305
		WBGene00004215	WBGene00004306
		WBGene00004266	WBGene00004313
		WBGene00004268	WBGene00004318
		WBGene00004270	WBGene00004319
		WBGene00004271	WBGene00004321
		WBGene00004273	WBGene00004324
		WBGene00004274	WBGene00004326
		WBGene00004276	WBGene00004336
		WBGene00004277	WBGene00004339
		WBGene00004286	WBGene00004350
		WBGene00004297	WBGene00004358
		WBGene00004300	WBGene00004364
		WBGene00004304	WBGene00004368
		WBGene00004307	WBGene00004373
		WBGene00004308	WBGene00004383
		WBGene00004311	WBGene00004387
		WBGene00004320	WBGene00004388
		WBGene00004337	WBGene00004392
		WBGene00004340	WBGene00004403
		WBGene00004341	WBGene00004405
		WBGene00004345	WBGene00004409
		WBGene00004355	WBGene00004410
		WBGene00004356	WBGene00004458
		WBGene00004357	WBGene00004459
		WBGene00004363	WBGene00004462
		WBGene00004369	WBGene00004463
		WBGene00004371	WBGene00004465
		WBGene00004375	WBGene00004506
		WBGene00004378	WBGene00004508
		WBGene00004381	WBGene00004679
		WBGene00004386	WBGene00004680
		WBGene00004390	WBGene00004681
		WBGene00004391	WBGene00004682
		WBGene00004397	WBGene00004698
		WBGene00004411	WBGene00004699
		WBGene00004460	WBGene00004700
		WBGene00004467	WBGene00004701
		WBGene00004468	WBGene00004702
		WBGene00004501	WBGene00004703
		WBGene00004504	WBGene00004704
		WBGene00004505	WBGene00004723
		WBGene00004684	WBGene00004735
		WBGene00004706	WBGene00004736
		WBGene00004727	WBGene00004738
		WBGene00004728	WBGene00004744
		WBGene00004729	WBGene00004751
		WBGene00004739	WBGene00004755
		WBGene00004743	WBGene00004756
		WBGene00004749	WBGene00004767
		WBGene00004752	WBGene00004768
		WBGene00004758	WBGene00004778
		WBGene00004759	WBGene00004781
		WBGene00004766	WBGene00004782
		WBGene00004769	WBGene00004789
		WBGene00004771	WBGene00004800
		WBGene00004773	WBGene00004804
		WBGene00004774	WBGene00004806
		WBGene00004786	WBGene00004807
		WBGene00004788	WBGene00004809
		WBGene00004795	WBGene00004810
		WBGene00004796	WBGene00004855
		WBGene00004822	WBGene00004856
		WBGene00004824	WBGene00004857
		WBGene00004825	WBGene00004858
		WBGene00004826	WBGene00004859
		WBGene00004829	WBGene00004860
		WBGene00004831	WBGene00004862
		WBGene00004876	WBGene00004879
		WBGene00004880	WBGene00004888
		WBGene00004881	WBGene00004890
		WBGene00004882	WBGene00004898
		WBGene00004884	WBGene00004915
		WBGene00004891	WBGene00004917
		WBGene00004892	WBGene00004921
		WBGene00004895	WBGene00004922
		WBGene00004896	WBGene00004925
		WBGene00004900	WBGene00004930
		WBGene00004916	WBGene00004945
		WBGene00004918	WBGene00004951
		WBGene00004919	WBGene00004979
		WBGene00004920	WBGene00004980
		WBGene00004923	WBGene00004981
		WBGene00004924	WBGene00004986
		WBGene00004931	WBGene00004987
		WBGene00004933	WBGene00004988
		WBGene00004946	WBGene00004990
		WBGene00004953	WBGene00004993
		WBGene00004958	WBGene00004995
		WBGene00004975	WBGene00005003
		WBGene00004989	WBGene00005007
		WBGene00004999	WBGene00005014
		WBGene00005001	WBGene00005015
		WBGene00005006	WBGene00005019
		WBGene00005018	WBGene00005025
		WBGene00005020	WBGene00005663
		WBGene00005026	WBGene00006039
		WBGene00005647	WBGene00006066
		WBGene00005648	WBGene00006307
		WBGene00005655	WBGene00006342
		WBGene00005833	WBGene00006351
		WBGene00006059	WBGene00006352
		WBGene00006061	WBGene00006353
		WBGene00006062	WBGene00006359
		WBGene00006063	WBGene00006369
		WBGene00006067	WBGene00006373
		WBGene00006306	WBGene00006382
		WBGene00006331	WBGene00006386
		WBGene00006371	WBGene00006397
		WBGene00006372	WBGene00006402
		WBGene00006376	WBGene00006404
		WBGene00006381	WBGene00006414
		WBGene00006385	WBGene00006433
		WBGene00006392	WBGene00006434
		WBGene00006393	WBGene00006438
		WBGene00006396	WBGene00006439
		WBGene00006405	WBGene00006446
		WBGene00006406	WBGene00006448
		WBGene00006407	WBGene00006472
		WBGene00006410	WBGene00006490
		WBGene00006415	WBGene00006493
		WBGene00006429	WBGene00006497
		WBGene00006432	WBGene00006504
		WBGene00006442	WBGene00006516
		WBGene00006444	WBGene00006518
		WBGene00006447	WBGene00006523
		WBGene00006450	WBGene00006527
		WBGene00006452	WBGene00006528
		WBGene00006460	WBGene00006529
		WBGene00006462	WBGene00006533
		WBGene00006465	WBGene00006536
		WBGene00006467	WBGene00006537
		WBGene00006474	WBGene00006543
		WBGene00006478	WBGene00006568
		WBGene00006479	WBGene00006577
		WBGene00006481	WBGene00006579
		WBGene00006483	WBGene00006590
		WBGene00006491	WBGene00006594
		WBGene00006494	WBGene00006595
		WBGene00006503	WBGene00006603
		WBGene00006508	WBGene00006604
		WBGene00006510	WBGene00006609
		WBGene00006512	WBGene00006617
		WBGene00006519	WBGene00006626
		WBGene00006520	WBGene00006628
		WBGene00006524	WBGene00006699
		WBGene00006538	WBGene00006704
		WBGene00006566	WBGene00006713
		WBGene00006567	WBGene00006720
		WBGene00006572	WBGene00006722
		WBGene00006573	WBGene00006727
		WBGene00006574	WBGene00006728
		WBGene00006580	WBGene00006734
		WBGene00006585	WBGene00006735
		WBGene00006586	WBGene00006736
		WBGene00006592	WBGene00006737
		WBGene00006593	WBGene00006739
		WBGene00006605	WBGene00006752
		WBGene00006607	WBGene00006760
		WBGene00006608	WBGene00006768
		WBGene00006627	WBGene00006769
		WBGene00006635	WBGene00006773
		WBGene00006638	WBGene00006779
		WBGene00006648	WBGene00006780
		WBGene00006649	WBGene00006785
		WBGene00006697	WBGene00006786
		WBGene00006698	WBGene00006794
		WBGene00006701	WBGene00006803
		WBGene00006702	WBGene00006815
		WBGene00006703	WBGene00006836
		WBGene00006708	WBGene00006839
		WBGene00006709	WBGene00006840
		WBGene00006711	WBGene00006852
		WBGene00006715	WBGene00006856
		WBGene00006721	WBGene00006876
		WBGene00006723	WBGene00006888
		WBGene00006724	WBGene00006890
		WBGene00006730	WBGene00006910
		WBGene00006738	WBGene00006911
		WBGene00006745	WBGene00006913
		WBGene00006749	WBGene00006915
		WBGene00006751	WBGene00006917
		WBGene00006754	WBGene00006918
		WBGene00006755	WBGene00006919
		WBGene00006757	WBGene00006920
		WBGene00006770	WBGene00006921
		WBGene00006771	WBGene00006923
		WBGene00006781	WBGene00006925
		WBGene00006784	WBGene00006929
		WBGene00006791	WBGene00006930
		WBGene00006802	WBGene00006933
		WBGene00006805	WBGene00006937
		WBGene00006810	WBGene00006941
		WBGene00006816	WBGene00006942
		WBGene00006817	WBGene00006943
		WBGene00006819	WBGene00006959
		WBGene00006820	WBGene00006961
		WBGene00006826	WBGene00006975
		WBGene00006833	WBGene00006994
		WBGene00006861	WBGene00006996
		WBGene00006869	WBGene00007000
		WBGene00006874	WBGene00007008
		WBGene00006875	WBGene00007009
		WBGene00006887	WBGene00007012
		WBGene00006914	WBGene00007013
		WBGene00006916	WBGene00007014
		WBGene00006922	WBGene00007016
		WBGene00006936	WBGene00007017
		WBGene00006945	WBGene00007023
		WBGene00006946	WBGene00007024
		WBGene00006951	WBGene00007027
		WBGene00006956	WBGene00007030
		WBGene00006957	WBGene00007042
		WBGene00006958	WBGene00007048
		WBGene00006963	WBGene00007064
		WBGene00006974	WBGene00007068
		WBGene00006979	WBGene00007070
		WBGene00006982	WBGene00007073
		WBGene00006986	WBGene00007088
		WBGene00006999	WBGene00007091
		WBGene00007007	WBGene00007101
		WBGene00007010	WBGene00007105
		WBGene00007015	WBGene00007106
		WBGene00007018	WBGene00007110
		WBGene00007026	WBGene00007111
		WBGene00007044	WBGene00007113
		WBGene00007045	WBGene00007143
		WBGene00007056	WBGene00007149
		WBGene00007059	WBGene00007153
		WBGene00007072	WBGene00007167
		WBGene00007089	WBGene00007180
		WBGene00007090	WBGene00007185
		WBGene00007093	WBGene00007186
		WBGene00007097	WBGene00007187
		WBGene00007099	WBGene00007195
		WBGene00007102	WBGene00007227
		WBGene00007103	WBGene00007228
		WBGene00007116	WBGene00007235
		WBGene00007118	WBGene00007236
		WBGene00007122	WBGene00007256
		WBGene00007129	WBGene00007267
		WBGene00007130	WBGene00007278
		WBGene00007135	WBGene00007284
		WBGene00007137	WBGene00007331
		WBGene00007139	WBGene00007350
		WBGene00007142	WBGene00007352
		WBGene00007144	WBGene00007353
		WBGene00007145	WBGene00007365
		WBGene00007175	WBGene00007368
		WBGene00007192	WBGene00007385
		WBGene00007193	WBGene00007386
		WBGene00007200	WBGene00007387
		WBGene00007207	WBGene00007394
		WBGene00007216	WBGene00007412
		WBGene00007226	WBGene00007413
		WBGene00007254	WBGene00007414
		WBGene00007260	WBGene00007421
		WBGene00007261	WBGene00007422
		WBGene00007270	WBGene00007428
		WBGene00007274	WBGene00007433
		WBGene00007296	WBGene00007455
		WBGene00007297	WBGene00007463
		WBGene00007301	WBGene00007514
		WBGene00007303	WBGene00007520
		WBGene00007312	WBGene00007534
		WBGene00007316	WBGene00007549
		WBGene00007317	WBGene00007555
		WBGene00007320	WBGene00007557
		WBGene00007332	WBGene00007565
		WBGene00007333	WBGene00007588
		WBGene00007348	WBGene00007593
		WBGene00007363	WBGene00007623
		WBGene00007390	WBGene00007646
		WBGene00007395	WBGene00007651
		WBGene00007400	WBGene00007666
		WBGene00007409	WBGene00007668
		WBGene00007429	WBGene00007681
		WBGene00007430	WBGene00007685
		WBGene00007435	WBGene00007686
		WBGene00007443	WBGene00007696
		WBGene00007449	WBGene00007720
		WBGene00007458	WBGene00007725
		WBGene00007460	WBGene00007726
		WBGene00007474	WBGene00007746
		WBGene00007488	WBGene00007784
		WBGene00007492	WBGene00007785
		WBGene00007493	WBGene00007807
		WBGene00007499	WBGene00007811
		WBGene00007506	WBGene00007812
		WBGene00007517	WBGene00007836
		WBGene00007529	WBGene00007848
		WBGene00007541	WBGene00007857
		WBGene00007544	WBGene00007907
		WBGene00007553	WBGene00007917
		WBGene00007556	WBGene00007918
		WBGene00007558	WBGene00007932
		WBGene00007561	WBGene00007952
		WBGene00007573	WBGene00007964
		WBGene00007574	WBGene00007969
		WBGene00007576	WBGene00007971
		WBGene00007579	WBGene00007975
		WBGene00007581	WBGene00008006
		WBGene00007605	WBGene00008053
		WBGene00007606	WBGene00008101
		WBGene00007609	WBGene00008117
		WBGene00007616	WBGene00008123
		WBGene00007620	WBGene00008148
		WBGene00007621	WBGene00008149
		WBGene00007625	WBGene00008164
		WBGene00007626	WBGene00008166
		WBGene00007627	WBGene00008194
		WBGene00007628	WBGene00008195
		WBGene00007630	WBGene00008198
		WBGene00007645	WBGene00008200
		WBGene00007647	WBGene00008224
		WBGene00007650	WBGene00008228
		WBGene00007684	WBGene00008229
		WBGene00007689	WBGene00008238
		WBGene00007695	WBGene00008239
		WBGene00007698	WBGene00008258
		WBGene00007707	WBGene00008266
		WBGene00007709	WBGene00008273
		WBGene00007711	WBGene00008274
		WBGene00007712	WBGene00008296
		WBGene00007718	WBGene00008317
		WBGene00007730	WBGene00008341
		WBGene00007743	WBGene00008362
		WBGene00007749	WBGene00008368
		WBGene00007753	WBGene00008371
		WBGene00007756	WBGene00008380
		WBGene00007760	WBGene00008405
		WBGene00007761	WBGene00008408
		WBGene00007772	WBGene00008410
		WBGene00007786	WBGene00008411
		WBGene00007787	WBGene00008414
		WBGene00007797	WBGene00008428
		WBGene00007819	WBGene00008430
		WBGene00007825	WBGene00008436
		WBGene00007826	WBGene00008486
		WBGene00007846	WBGene00008495
		WBGene00007855	WBGene00008498
		WBGene00007881	WBGene00008499
		WBGene00007882	WBGene00008505
		WBGene00007883	WBGene00008506
		WBGene00007886	WBGene00008514
		WBGene00007892	WBGene00008549
		WBGene00007898	WBGene00008560
		WBGene00007904	WBGene00008564
		WBGene00007912	WBGene00008567
		WBGene00007923	WBGene00008577
		WBGene00007927	WBGene00008583
		WBGene00007934	WBGene00008607
		WBGene00007941	WBGene00008610
		WBGene00007942	WBGene00008621
		WBGene00007944	WBGene00008639
		WBGene00007955	WBGene00008642
		WBGene00007958	WBGene00008646
		WBGene00007959	WBGene00008648
		WBGene00007974	WBGene00008654
		WBGene00007976	WBGene00008665
		WBGene00007978	WBGene00008669
		WBGene00007979	WBGene00008683
		WBGene00007980	WBGene00008720
		WBGene00007982	WBGene00008733
		WBGene00007984	WBGene00008741
		WBGene00007993	WBGene00008749
		WBGene00008000	WBGene00008760
		WBGene00008010	WBGene00008764
		WBGene00008019	WBGene00008775
		WBGene00008035	WBGene00008780
		WBGene00008089	WBGene00008800
		WBGene00008107	WBGene00008848
		WBGene00008110	WBGene00008852
		WBGene00008131	WBGene00008856
		WBGene00008132	WBGene00008857
		WBGene00008136	WBGene00008862
		WBGene00008147	WBGene00008876
		WBGene00008165	WBGene00008890
		WBGene00008167	WBGene00008900
		WBGene00008169	WBGene00008919
		WBGene00008183	WBGene00008920
		WBGene00008191	WBGene00008922
		WBGene00008199	WBGene00008936
		WBGene00008211	WBGene00008940
		WBGene00008215	WBGene00008944
		WBGene00008218	WBGene00008948
		WBGene00008226	WBGene00008999
		WBGene00008227	WBGene00009002
		WBGene00008233	WBGene00009011
		WBGene00008255	WBGene00009012
		WBGene00008262	WBGene00009013
		WBGene00008281	WBGene00009023
		WBGene00008298	WBGene00009045
		WBGene00008318	WBGene00009050
		WBGene00008330	WBGene00009051
		WBGene00008331	WBGene00009078
		WBGene00008338	WBGene00009082
		WBGene00008339	WBGene00009084
		WBGene00008343	WBGene00009093
		WBGene00008344	WBGene00009098
		WBGene00008356	WBGene00009112
		WBGene00008361	WBGene00009118
		WBGene00008366	WBGene00009119
		WBGene00008369	WBGene00009120
		WBGene00008372	WBGene00009122
		WBGene00008375	WBGene00009123
		WBGene00008386	WBGene00009141
		WBGene00008398	WBGene00009162
		WBGene00008412	WBGene00009164
		WBGene00008413	WBGene00009177
		WBGene00008415	WBGene00009188
		WBGene00008417	WBGene00009189
		WBGene00008420	WBGene00009192
		WBGene00008424	WBGene00009200
		WBGene00008431	WBGene00009201
		WBGene00008446	WBGene00009211
		WBGene00008452	WBGene00009223
		WBGene00008454	WBGene00009234
		WBGene00008455	WBGene00009237
		WBGene00008480	WBGene00009246
		WBGene00008492	WBGene00009254
		WBGene00008494	WBGene00009259
		WBGene00008502	WBGene00009264
		WBGene00008504	WBGene00009266
		WBGene00008521	WBGene00009277
		WBGene00008533	WBGene00009285
		WBGene00008538	WBGene00009322
		WBGene00008546	WBGene00009334
		WBGene00008548	WBGene00009336
		WBGene00008553	WBGene00009347
		WBGene00008555	WBGene00009367
		WBGene00008569	WBGene00009389
		WBGene00008571	WBGene00009394
		WBGene00008572	WBGene00009396
		WBGene00008576	WBGene00009397
		WBGene00008580	WBGene00009431
		WBGene00008586	WBGene00009433
		WBGene00008601	WBGene00009435
		WBGene00008602	WBGene00009436
		WBGene00008606	WBGene00009440
		WBGene00008624	WBGene00009448
		WBGene00008641	WBGene00009454
		WBGene00008644	WBGene00009455
		WBGene00008645	WBGene00009456
		WBGene00008667	WBGene00009460
		WBGene00008684	WBGene00009498
		WBGene00008685	WBGene00009499
		WBGene00008686	WBGene00009505
		WBGene00008694	WBGene00009518
		WBGene00008729	WBGene00009542
		WBGene00008745	WBGene00009553
		WBGene00008748	WBGene00009574
		WBGene00008762	WBGene00009578
		WBGene00008765	WBGene00009582
		WBGene00008766	WBGene00009583
		WBGene00008767	WBGene00009587
		WBGene00008768	WBGene00009595
		WBGene00008806	WBGene00009632
		WBGene00008820	WBGene00009635
		WBGene00008831	WBGene00009649
		WBGene00008850	WBGene00009661
		WBGene00008859	WBGene00009666
		WBGene00008860	WBGene00009671
		WBGene00008865	WBGene00009677
		WBGene00008878	WBGene00009688
		WBGene00008880	WBGene00009739
		WBGene00008882	WBGene00009740
		WBGene00008914	WBGene00009771
		WBGene00008915	WBGene00009773
		WBGene00008917	WBGene00009783
		WBGene00008918	WBGene00009793
		WBGene00008925	WBGene00009797
		WBGene00008927	WBGene00009812
		WBGene00008930	WBGene00009825
		WBGene00008932	WBGene00009829
		WBGene00008939	WBGene00009877
		WBGene00008951	WBGene00009880
		WBGene00008969	WBGene00009881
		WBGene00008971	WBGene00009882
		WBGene00008973	WBGene00009888
		WBGene00008974	WBGene00009899
		WBGene00008975	WBGene00009915
		WBGene00008980	WBGene00009918
		WBGene00008986	WBGene00009920
		WBGene00009006	WBGene00009924
		WBGene00009042	WBGene00009943
		WBGene00009049	WBGene00009957
		WBGene00009052	WBGene00009971
		WBGene00009056	WBGene00009974
		WBGene00009058	WBGene00009976
		WBGene00009061	WBGene00009993
		WBGene00009065	WBGene00010012
		WBGene00009092	WBGene00010013
		WBGene00009097	WBGene00010037
		WBGene00009100	WBGene00010042
		WBGene00009103	WBGene00010047
		WBGene00009106	WBGene00010049
		WBGene00009116	WBGene00010050
		WBGene00009131	WBGene00010054
		WBGene00009139	WBGene00010063
		WBGene00009140	WBGene00010070
		WBGene00009142	WBGene00010083
		WBGene00009165	WBGene00010089
		WBGene00009172	WBGene00010113
		WBGene00009174	WBGene00010117
		WBGene00009180	WBGene00010132
		WBGene00009187	WBGene00010135
		WBGene00009215	WBGene00010150
		WBGene00009219	WBGene00010160
		WBGene00009221	WBGene00010199
		WBGene00009224	WBGene00010204
		WBGene00009245	WBGene00010221
		WBGene00009256	WBGene00010230
		WBGene00009262	WBGene00010231
		WBGene00009274	WBGene00010232
		WBGene00009286	WBGene00010233
		WBGene00009293	WBGene00010262
		WBGene00009314	WBGene00010264
		WBGene00009319	WBGene00010266
		WBGene00009320	WBGene00010279
		WBGene00009337	WBGene00010280
		WBGene00009346	WBGene00010284
		WBGene00009352	WBGene00010286
		WBGene00009353	WBGene00010296
		WBGene00009364	WBGene00010303
		WBGene00009369	WBGene00010307
		WBGene00009377	WBGene00010317
		WBGene00009404	WBGene00010325
		WBGene00009430	WBGene00010326
		WBGene00009432	WBGene00010339
		WBGene00009434	WBGene00010340
		WBGene00009443	WBGene00010383
		WBGene00009445	WBGene00010397
		WBGene00009450	WBGene00010405
		WBGene00009451	WBGene00010407
		WBGene00009452	WBGene00010419
		WBGene00009477	WBGene00010425
		WBGene00009478	WBGene00010470
		WBGene00009479	WBGene00010476
		WBGene00009482	WBGene00010479
		WBGene00009503	WBGene00010524
		WBGene00009508	WBGene00010540
		WBGene00009521	WBGene00010550
		WBGene00009532	WBGene00010556
		WBGene00009534	WBGene00010567
		WBGene00009551	WBGene00010579
		WBGene00009554	WBGene00010597
		WBGene00009556	WBGene00010605
		WBGene00009559	WBGene00010625
		WBGene00009562	WBGene00010626
		WBGene00009563	WBGene00010627
		WBGene00009565	WBGene00010629
		WBGene00009575	WBGene00010631
		WBGene00009580	WBGene00010641
		WBGene00009594	WBGene00010657
		WBGene00009620	WBGene00010658
		WBGene00009623	WBGene00010660
		WBGene00009636	WBGene00010664
		WBGene00009640	WBGene00010665
		WBGene00009642	WBGene00010676
		WBGene00009648	WBGene00010681
		WBGene00009650	WBGene00010697
		WBGene00009654	WBGene00010699
		WBGene00009660	WBGene00010700
		WBGene00009664	WBGene00010701
		WBGene00009668	WBGene00010713
		WBGene00009674	WBGene00010730
		WBGene00009676	WBGene00010744
		WBGene00009711	WBGene00010749
		WBGene00009717	WBGene00010767
		WBGene00009723	WBGene00010769
		WBGene00009724	WBGene00010778
		WBGene00009731	WBGene00010780
		WBGene00009734	WBGene00010806
		WBGene00009736	WBGene00010807
		WBGene00009741	WBGene00010809
		WBGene00009745	WBGene00010813
		WBGene00009784	WBGene00010828
		WBGene00009796	WBGene00010850
		WBGene00009801	WBGene00010870
		WBGene00009803	WBGene00010877
		WBGene00009804	WBGene00010882
		WBGene00009842	WBGene00010890
		WBGene00009850	WBGene00010897
		WBGene00009851	WBGene00010904
		WBGene00009884	WBGene00010905
		WBGene00009886	WBGene00010908
		WBGene00009895	WBGene00010912
		WBGene00009927	WBGene00010935
		WBGene00009940	WBGene00010943
		WBGene00009952	WBGene00010977
		WBGene00009966	WBGene00010988
		WBGene00009978	WBGene00010993
		WBGene00009982	WBGene00011006
		WBGene00009995	WBGene00011015
		WBGene00009996	WBGene00011030
		WBGene00010000	WBGene00011032
		WBGene00010006	WBGene00011033
		WBGene00010019	WBGene00011036
		WBGene00010028	WBGene00011051
		WBGene00010038	WBGene00011063
		WBGene00010040	WBGene00011064
		WBGene00010041	WBGene00011068
		WBGene00010045	WBGene00011071
		WBGene00010052	WBGene00011083
		WBGene00010056	WBGene00011102
		WBGene00010059	WBGene00011105
		WBGene00010084	WBGene00011111
		WBGene00010086	WBGene00011115
		WBGene00010094	WBGene00011116
		WBGene00010115	WBGene00011119
		WBGene00010116	WBGene00011122
		WBGene00010124	WBGene00011128
		WBGene00010128	WBGene00011146
		WBGene00010130	WBGene00011155
		WBGene00010133	WBGene00011181
		WBGene00010139	WBGene00011198
		WBGene00010174	WBGene00011222
		WBGene00010177	WBGene00011230
		WBGene00010178	WBGene00011232
		WBGene00010188	WBGene00011237
		WBGene00010196	WBGene00011239
		WBGene00010197	WBGene00011240
		WBGene00010198	WBGene00011271
		WBGene00010225	WBGene00011272
		WBGene00010238	WBGene00011273
		WBGene00010268	WBGene00011289
		WBGene00010272	WBGene00011291
		WBGene00010274	WBGene00011292
		WBGene00010277	WBGene00011298
		WBGene00010283	WBGene00011300
		WBGene00010290	WBGene00011304
		WBGene00010305	WBGene00011306
		WBGene00010308	WBGene00011312
		WBGene00010309	WBGene00011330
		WBGene00010333	WBGene00011333
		WBGene00010336	WBGene00011334
		WBGene00010337	WBGene00011335
		WBGene00010362	WBGene00011374
		WBGene00010408	WBGene00011409
		WBGene00010409	WBGene00011412
		WBGene00010416	WBGene00011415
		WBGene00010418	WBGene00011423
		WBGene00010428	WBGene00011444
		WBGene00010433	WBGene00011474
		WBGene00010444	WBGene00011480
		WBGene00010465	WBGene00011481
		WBGene00010468	WBGene00011487
		WBGene00010488	WBGene00011488
		WBGene00010496	WBGene00011500
		WBGene00010500	WBGene00011502
		WBGene00010507	WBGene00011507
		WBGene00010538	WBGene00011517
		WBGene00010539	WBGene00011527
		WBGene00010545	WBGene00011529
		WBGene00010560	WBGene00011559
		WBGene00010565	WBGene00011564
		WBGene00010569	WBGene00011571
		WBGene00010575	WBGene00011580
		WBGene00010582	WBGene00011629
		WBGene00010583	WBGene00011635
		WBGene00010608	WBGene00011638
		WBGene00010610	WBGene00011639
		WBGene00010615	WBGene00011661
		WBGene00010620	WBGene00011687
		WBGene00010622	WBGene00011720
		WBGene00010624	WBGene00011722
		WBGene00010639	WBGene00011723
		WBGene00010671	WBGene00011737
		WBGene00010673	WBGene00011738
		WBGene00010678	WBGene00011740
		WBGene00010687	WBGene00011742
		WBGene00010702	WBGene00011767
		WBGene00010724	WBGene00011773
		WBGene00010725	WBGene00011775
		WBGene00010726	WBGene00011776
		WBGene00010727	WBGene00011777
		WBGene00010731	WBGene00011798
		WBGene00010732	WBGene00011802
		WBGene00010736	WBGene00011803
		WBGene00010738	WBGene00011827
		WBGene00010740	WBGene00011828
		WBGene00010766	WBGene00011839
		WBGene00010770	WBGene00011849
		WBGene00010772	WBGene00011850
		WBGene00010790	WBGene00011856
		WBGene00010793	WBGene00011857
		WBGene00010794	WBGene00011867
		WBGene00010795	WBGene00011871
		WBGene00010805	WBGene00011872
		WBGene00010815	WBGene00011875
		WBGene00010822	WBGene00011885
		WBGene00010827	WBGene00011890
		WBGene00010834	WBGene00011894
		WBGene00010840	WBGene00011920
		WBGene00010858	WBGene00011932
		WBGene00010865	WBGene00011936
		WBGene00010867	WBGene00011938
		WBGene00010868	WBGene00011940
		WBGene00010878	WBGene00011944
		WBGene00010879	WBGene00011972
		WBGene00010888	WBGene00011977
		WBGene00010901	WBGene00011980
		WBGene00010909	WBGene00011985
		WBGene00010911	WBGene00011994
		WBGene00010913	WBGene00012002
		WBGene00010918	WBGene00012004
		WBGene00010923	WBGene00012005
		WBGene00010924	WBGene00012015
		WBGene00010976	WBGene00012016
		WBGene00011017	WBGene00012018
		WBGene00011029	WBGene00012031
		WBGene00011034	WBGene00012033
		WBGene00011035	WBGene00012097
		WBGene00011038	WBGene00012100
		WBGene00011045	WBGene00012130
		WBGene00011058	WBGene00012134
		WBGene00011067	WBGene00012136
		WBGene00011069	WBGene00012140
		WBGene00011094	WBGene00012144
		WBGene00011095	WBGene00012182
		WBGene00011103	WBGene00012187
		WBGene00011106	WBGene00012193
		WBGene00011142	WBGene00012203
		WBGene00011144	WBGene00012205
		WBGene00011156	WBGene00012206
		WBGene00011190	WBGene00012230
		WBGene00011193	WBGene00012245
		WBGene00011194	WBGene00012251
		WBGene00011205	WBGene00012253
		WBGene00011206	WBGene00012306
		WBGene00011221	WBGene00012316
		WBGene00011223	WBGene00012319
		WBGene00011226	WBGene00012324
		WBGene00011250	WBGene00012337
		WBGene00011253	WBGene00012339
		WBGene00011259	WBGene00012344
		WBGene00011268	WBGene00012354
		WBGene00011270	WBGene00012359
		WBGene00011274	WBGene00012362
		WBGene00011276	WBGene00012365
		WBGene00011282	WBGene00012376
		WBGene00011286	WBGene00012407
		WBGene00011299	WBGene00012445
		WBGene00011308	WBGene00012462
		WBGene00011309	WBGene00012463
		WBGene00011310	WBGene00012464
		WBGene00011311	WBGene00012471
		WBGene00011313	WBGene00012472
		WBGene00011319	WBGene00012474
		WBGene00011320	WBGene00012484
		WBGene00011329	WBGene00012497
		WBGene00011338	WBGene00012529
		WBGene00011349	WBGene00012531
		WBGene00011352	WBGene00012538
		WBGene00011375	WBGene00012543
		WBGene00011383	WBGene00012554
		WBGene00011392	WBGene00012583
		WBGene00011398	WBGene00012615
		WBGene00011399	WBGene00012624
		WBGene00011408	WBGene00012658
		WBGene00011410	WBGene00012664
		WBGene00011411	WBGene00012676
		WBGene00011428	WBGene00012712
		WBGene00011439	WBGene00012714
		WBGene00011441	WBGene00012717
		WBGene00011445	WBGene00012768
		WBGene00011449	WBGene00012769
		WBGene00011451	WBGene00012782
		WBGene00011464	WBGene00012802
		WBGene00011503	WBGene00012803
		WBGene00011522	WBGene00012829
		WBGene00011528	WBGene00012854
		WBGene00011551	WBGene00012896
		WBGene00011561	WBGene00012897
		WBGene00011586	WBGene00012903
		WBGene00011589	WBGene00012907
		WBGene00011590	WBGene00012909
		WBGene00011604	WBGene00012910
		WBGene00011624	WBGene00012911
		WBGene00011631	WBGene00012923
		WBGene00011634	WBGene00012930
		WBGene00011636	WBGene00012943
		WBGene00011637	WBGene00012964
		WBGene00011641	WBGene00012978
		WBGene00011647	WBGene00012994
		WBGene00011648	WBGene00013011
		WBGene00011672	WBGene00013024
		WBGene00011679	WBGene00013025
		WBGene00011681	WBGene00013026
		WBGene00011684	WBGene00013042
		WBGene00011688	WBGene00013136
		WBGene00011696	WBGene00013139
		WBGene00011707	WBGene00013144
		WBGene00011713	WBGene00013176
		WBGene00011717	WBGene00013200
		WBGene00011719	WBGene00013203
		WBGene00011731	WBGene00013227
		WBGene00011733	WBGene00013236
		WBGene00011734	WBGene00013307
		WBGene00011747	WBGene00013311
		WBGene00011753	WBGene00013373
		WBGene00011755	WBGene00013379
		WBGene00011756	WBGene00013448
		WBGene00011758	WBGene00013462
		WBGene00011759	WBGene00013550
		WBGene00011761	WBGene00013556
		WBGene00011800	WBGene00013560
		WBGene00011801	WBGene00013568
		WBGene00011806	WBGene00013580
		WBGene00011807	WBGene00013594
		WBGene00011814	WBGene00013597
		WBGene00011815	WBGene00013606
		WBGene00011821	WBGene00013639
		WBGene00011823	WBGene00013670
		WBGene00011824	WBGene00013671
		WBGene00011831	WBGene00013674
		WBGene00011834	WBGene00013689
		WBGene00011858	WBGene00013694
		WBGene00011859	WBGene00013695
		WBGene00011860	WBGene00013703
		WBGene00011864	WBGene00013709
		WBGene00011870	WBGene00013716
		WBGene00011887	WBGene00013720
		WBGene00011888	WBGene00013724
		WBGene00011892	WBGene00013725
		WBGene00011897	WBGene00013734
		WBGene00011898	WBGene00013808
		WBGene00011904	WBGene00013866
		WBGene00011908	WBGene00013874
		WBGene00011935	WBGene00013892
		WBGene00011939	WBGene00013906
		WBGene00011941	WBGene00013919
		WBGene00011953	WBGene00013920
		WBGene00011957	WBGene00013923
		WBGene00011962	WBGene00013924
		WBGene00011964	WBGene00013958
		WBGene00011966	WBGene00013985
		WBGene00011967	WBGene00013989
		WBGene00011969	WBGene00013997
		WBGene00011970	WBGene00014001
		WBGene00011974	WBGene00014012
		WBGene00011975	WBGene00014013
		WBGene00011979	WBGene00014015
		WBGene00011995	WBGene00014016
		WBGene00011997	WBGene00014019
		WBGene00012000	WBGene00014020
		WBGene00012020	WBGene00014022
		WBGene00012029	WBGene00014025
		WBGene00012035	WBGene00014057
		WBGene00012101	WBGene00014075
		WBGene00012106	WBGene00014087
		WBGene00012113	WBGene00014090
		WBGene00012117	WBGene00014095
		WBGene00012126	WBGene00014109
		WBGene00012149	WBGene00014114
		WBGene00012150	WBGene00014115
		WBGene00012152	WBGene00014119
		WBGene00012156	WBGene00014120
		WBGene00012157	WBGene00014138
		WBGene00012158	WBGene00014140
		WBGene00012185	WBGene00014141
		WBGene00012188	WBGene00014151
		WBGene00012208	WBGene00014164
		WBGene00012216	WBGene00014177
		WBGene00012221	WBGene00014204
		WBGene00012226	WBGene00014233
		WBGene00012234	WBGene00014244
		WBGene00012239	WBGene00014249
		WBGene00012243	WBGene00014251
		WBGene00012244	WBGene00014252
		WBGene00012258	WBGene00014253
		WBGene00012298	WBGene00014259
		WBGene00012326	WBGene00014262
		WBGene00012348	WBGene00014666
		WBGene00012351	WBGene00014669
		WBGene00012366	WBGene00015007
		WBGene00012369	WBGene00015009
		WBGene00012375	WBGene00015021
		WBGene00012382	WBGene00015048
		WBGene00012383	WBGene00015050
		WBGene00012386	WBGene00015057
		WBGene00012393	WBGene00015064
		WBGene00012421	WBGene00015074
		WBGene00012423	WBGene00015099
		WBGene00012434	WBGene00015116
		WBGene00012435	WBGene00015124
		WBGene00012444	WBGene00015125
		WBGene00012452	WBGene00015126
		WBGene00012458	WBGene00015128
		WBGene00012466	WBGene00015143
		WBGene00012483	WBGene00015146
		WBGene00012494	WBGene00015156
		WBGene00012496	WBGene00015161
		WBGene00012512	WBGene00015168
		WBGene00012522	WBGene00015173
		WBGene00012524	WBGene00015181
		WBGene00012530	WBGene00015206
		WBGene00012532	WBGene00015208
		WBGene00012545	WBGene00015217
		WBGene00012546	WBGene00015219
		WBGene00012555	WBGene00015220
		WBGene00012556	WBGene00015232
		WBGene00012557	WBGene00015237
		WBGene00012558	WBGene00015280
		WBGene00012576	WBGene00015283
		WBGene00012578	WBGene00015330
		WBGene00012593	WBGene00015344
		WBGene00012600	WBGene00015346
		WBGene00012602	WBGene00015381
		WBGene00012605	WBGene00015389
		WBGene00012606	WBGene00015455
		WBGene00012634	WBGene00015461
		WBGene00012641	WBGene00015469
		WBGene00012643	WBGene00015481
		WBGene00012652	WBGene00015484
		WBGene00012660	WBGene00015488
		WBGene00012665	WBGene00015492
		WBGene00012666	WBGene00015509
		WBGene00012675	WBGene00015538
		WBGene00012692	WBGene00015547
		WBGene00012693	WBGene00015551
		WBGene00012694	WBGene00015565
		WBGene00012695	WBGene00015580
		WBGene00012713	WBGene00015608
		WBGene00012718	WBGene00015609
		WBGene00012722	WBGene00015644
		WBGene00012728	WBGene00015650
		WBGene00012732	WBGene00015676
		WBGene00012735	WBGene00015684
		WBGene00012738	WBGene00015687
		WBGene00012740	WBGene00015702
		WBGene00012755	WBGene00015703
		WBGene00012756	WBGene00015713
		WBGene00012758	WBGene00015734
		WBGene00012762	WBGene00015746
		WBGene00012765	WBGene00015754
		WBGene00012766	WBGene00015756
		WBGene00012767	WBGene00015759
		WBGene00012781	WBGene00015767
		WBGene00012794	WBGene00015783
		WBGene00012807	WBGene00015791
		WBGene00012812	WBGene00015793
		WBGene00012813	WBGene00015810
		WBGene00012825	WBGene00015811
		WBGene00012834	WBGene00015813
		WBGene00012850	WBGene00015814
		WBGene00012853	WBGene00015823
		WBGene00012860	WBGene00015885
		WBGene00012868	WBGene00015887
		WBGene00012880	WBGene00015920
		WBGene00012888	WBGene00015930
		WBGene00012904	WBGene00015933
		WBGene00012928	WBGene00015938
		WBGene00012929	WBGene00015940
		WBGene00012938	WBGene00015941
		WBGene00012950	WBGene00015943
		WBGene00012961	WBGene00015949
		WBGene00012966	WBGene00015956
		WBGene00012970	WBGene00015965
		WBGene00012973	WBGene00015972
		WBGene00012983	WBGene00015978
		WBGene00012990	WBGene00016004
		WBGene00012997	WBGene00016011
		WBGene00013002	WBGene00016014
		WBGene00013014	WBGene00016015
		WBGene00013015	WBGene00016019
		WBGene00013020	WBGene00016020
		WBGene00013029	WBGene00016027
		WBGene00013034	WBGene00016030
		WBGene00013037	WBGene00016061
		WBGene00013038	WBGene00016068
		WBGene00013039	WBGene00016102
		WBGene00013055	WBGene00016103
		WBGene00013073	WBGene00016121
		WBGene00013077	WBGene00016124
		WBGene00013078	WBGene00016128
		WBGene00013080	WBGene00016129
		WBGene00013094	WBGene00016134
		WBGene00013095	WBGene00016140
		WBGene00013124	WBGene00016144
		WBGene00013132	WBGene00016148
		WBGene00013150	WBGene00016162
		WBGene00013164	WBGene00016171
		WBGene00013168	WBGene00016172
		WBGene00013178	WBGene00016173
		WBGene00013197	WBGene00016174
		WBGene00013202	WBGene00016203
		WBGene00013210	WBGene00016218
		WBGene00013211	WBGene00016219
		WBGene00013213	WBGene00016235
		WBGene00013217	WBGene00016245
		WBGene00013219	WBGene00016250
		WBGene00013225	WBGene00016258
		WBGene00013231	WBGene00016274
		WBGene00013238	WBGene00016317
		WBGene00013239	WBGene00016318
		WBGene00013241	WBGene00016326
		WBGene00013243	WBGene00016332
		WBGene00013266	WBGene00016333
		WBGene00013269	WBGene00016354
		WBGene00013295	WBGene00016375
		WBGene00013301	WBGene00016376
		WBGene00013302	WBGene00016379
		WBGene00013308	WBGene00016391
		WBGene00013317	WBGene00016404
		WBGene00013323	WBGene00016405
		WBGene00013324	WBGene00016408
		WBGene00013327	WBGene00016409
		WBGene00013332	WBGene00016415
		WBGene00013343	WBGene00016418
		WBGene00013347	WBGene00016424
		WBGene00013352	WBGene00016425
		WBGene00013354	WBGene00016431
		WBGene00013355	WBGene00016438
		WBGene00013358	WBGene00016439
		WBGene00013360	WBGene00016446
		WBGene00013365	WBGene00016450
		WBGene00013378	WBGene00016469
		WBGene00013382	WBGene00016489
		WBGene00013406	WBGene00016495
		WBGene00013407	WBGene00016496
		WBGene00013433	WBGene00016509
		WBGene00013434	WBGene00016540
		WBGene00013435	WBGene00016542
		WBGene00013436	WBGene00016555
		WBGene00013439	WBGene00016582
		WBGene00013441	WBGene00016594
		WBGene00013446	WBGene00016602
		WBGene00013460	WBGene00016603
		WBGene00013464	WBGene00016614
		WBGene00013465	WBGene00016624
		WBGene00013481	WBGene00016629
		WBGene00013515	WBGene00016630
		WBGene00013531	WBGene00016631
		WBGene00013532	WBGene00016644
		WBGene00013538	WBGene00016655
		WBGene00013541	WBGene00016705
		WBGene00013548	WBGene00016717
		WBGene00013553	WBGene00016719
		WBGene00013558	WBGene00016728
		WBGene00013559	WBGene00016735
		WBGene00013577	WBGene00016740
		WBGene00013588	WBGene00016756
		WBGene00013595	WBGene00016759
		WBGene00013596	WBGene00016760
		WBGene00013598	WBGene00016769
		WBGene00013601	WBGene00016790
		WBGene00013604	WBGene00016844
		WBGene00013605	WBGene00016865
		WBGene00013632	WBGene00016867
		WBGene00013647	WBGene00016888
		WBGene00013654	WBGene00016889
		WBGene00013676	WBGene00016892
		WBGene00013677	WBGene00016907
		WBGene00013678	WBGene00016912
		WBGene00013687	WBGene00016934
		WBGene00013688	WBGene00016957
		WBGene00013690	WBGene00016958
		WBGene00013692	WBGene00016961
		WBGene00013697	WBGene00016966
		WBGene00013708	WBGene00016981
		WBGene00013718	WBGene00016989
		WBGene00013719	WBGene00016990
		WBGene00013732	WBGene00016995
		WBGene00013735	WBGene00016997
		WBGene00013737	WBGene00017002
		WBGene00013740	WBGene00017004
		WBGene00013758	WBGene00017012
		WBGene00013768	WBGene00017017
		WBGene00013790	WBGene00017045
		WBGene00013803	WBGene00017070
		WBGene00013805	WBGene00017071
		WBGene00013806	WBGene00017075
		WBGene00013845	WBGene00017079
		WBGene00013857	WBGene00017085
		WBGene00013867	WBGene00017088
		WBGene00013869	WBGene00017101
		WBGene00013882	WBGene00017119
		WBGene00013894	WBGene00017121
		WBGene00013898	WBGene00017123
		WBGene00013899	WBGene00017125
		WBGene00013921	WBGene00017137
		WBGene00013925	WBGene00017138
		WBGene00013934	WBGene00017158
		WBGene00013947	WBGene00017163
		WBGene00013964	WBGene00017166
		WBGene00013967	WBGene00017217
		WBGene00013984	WBGene00017220
		WBGene00013986	WBGene00017268
		WBGene00014000	WBGene00017273
		WBGene00014004	WBGene00017274
		WBGene00014017	WBGene00017282
		WBGene00014018	WBGene00017285
		WBGene00014021	WBGene00017289
		WBGene00014036	WBGene00017311
		WBGene00014046	WBGene00017347
		WBGene00014051	WBGene00017349
		WBGene00014052	WBGene00017369
		WBGene00014054	WBGene00017374
		WBGene00014058	WBGene00017385
		WBGene00014081	WBGene00017419
		WBGene00014086	WBGene00017430
		WBGene00014088	WBGene00017434
		WBGene00014096	WBGene00017444
		WBGene00014098	WBGene00017448
		WBGene00014099	WBGene00017480
		WBGene00014117	WBGene00017487
		WBGene00014118	WBGene00017549
		WBGene00014124	WBGene00017563
		WBGene00014125	WBGene00017591
		WBGene00014137	WBGene00017605
		WBGene00014139	WBGene00017641
		WBGene00014181	WBGene00017643
		WBGene00014202	WBGene00017667
		WBGene00014213	WBGene00017687
		WBGene00014215	WBGene00017688
		WBGene00014218	WBGene00017690
		WBGene00014219	WBGene00017698
		WBGene00014221	WBGene00017719
		WBGene00014222	WBGene00017734
		WBGene00014224	WBGene00017735
		WBGene00014226	WBGene00017758
		WBGene00014230	WBGene00017765
		WBGene00014232	WBGene00017766
		WBGene00014234	WBGene00017768
		WBGene00014240	WBGene00017770
		WBGene00014243	WBGene00017775
		WBGene00014258	WBGene00017777
		WBGene00014697	WBGene00017816
		WBGene00014826	WBGene00017830
		WBGene00014938	WBGene00017834
		WBGene00014999	WBGene00017852
		WBGene00015022	WBGene00017855
		WBGene00015025	WBGene00017881
		WBGene00015029	WBGene00017887
		WBGene00015038	WBGene00017891
		WBGene00015046	WBGene00017892
		WBGene00015067	WBGene00017901
		WBGene00015075	WBGene00017905
		WBGene00015092	WBGene00017920
		WBGene00015102	WBGene00017921
		WBGene00015104	WBGene00017929
		WBGene00015107	WBGene00017948
		WBGene00015115	WBGene00017951
		WBGene00015117	WBGene00017964
		WBGene00015122	WBGene00017979
		WBGene00015145	WBGene00017981
		WBGene00015160	WBGene00017984
		WBGene00015162	WBGene00017988
		WBGene00015163	WBGene00017989
		WBGene00015172	WBGene00017993
		WBGene00015176	WBGene00018008
		WBGene00015184	WBGene00018009
		WBGene00015186	WBGene00018014
		WBGene00015194	WBGene00018015
		WBGene00015218	WBGene00018017
		WBGene00015233	WBGene00018044
		WBGene00015245	WBGene00018100
		WBGene00015248	WBGene00018117
		WBGene00015251	WBGene00018137
		WBGene00015282	WBGene00018138
		WBGene00015284	WBGene00018145
		WBGene00015285	WBGene00018151
		WBGene00015293	WBGene00018152
		WBGene00015295	WBGene00018154
		WBGene00015296	WBGene00018156
		WBGene00015297	WBGene00018174
		WBGene00015301	WBGene00018181
		WBGene00015322	WBGene00018193
		WBGene00015326	WBGene00018208
		WBGene00015329	WBGene00018210
		WBGene00015336	WBGene00018237
		WBGene00015339	WBGene00018238
		WBGene00015340	WBGene00018285
		WBGene00015352	WBGene00018290
		WBGene00015354	WBGene00018294
		WBGene00015393	WBGene00018302
		WBGene00015400	WBGene00018305
		WBGene00015404	WBGene00018321
		WBGene00015418	WBGene00018341
		WBGene00015423	WBGene00018350
		WBGene00015425	WBGene00018374
		WBGene00015427	WBGene00018390
		WBGene00015450	WBGene00018391
		WBGene00015454	WBGene00018395
		WBGene00015460	WBGene00018398
		WBGene00015463	WBGene00018417
		WBGene00015476	WBGene00018420
		WBGene00015486	WBGene00018424
		WBGene00015487	WBGene00018426
		WBGene00015507	WBGene00018435
		WBGene00015508	WBGene00018481
		WBGene00015513	WBGene00018482
		WBGene00015514	WBGene00018491
		WBGene00015515	WBGene00018509
		WBGene00015517	WBGene00018518
		WBGene00015518	WBGene00018520
		WBGene00015540	WBGene00018522
		WBGene00015553	WBGene00018564
		WBGene00015554	WBGene00018586
		WBGene00015555	WBGene00018604
		WBGene00015561	WBGene00018637
		WBGene00015567	WBGene00018645
		WBGene00015579	WBGene00018646
		WBGene00015581	WBGene00018657
		WBGene00015621	WBGene00018700
		WBGene00015633	WBGene00018703
		WBGene00015648	WBGene00018704
		WBGene00015658	WBGene00018715
		WBGene00015671	WBGene00018717
		WBGene00015680	WBGene00018729
		WBGene00015683	WBGene00018734
		WBGene00015691	WBGene00018755
		WBGene00015695	WBGene00018756
		WBGene00015697	WBGene00018764
		WBGene00015709	WBGene00018779
		WBGene00015735	WBGene00018782
		WBGene00015744	WBGene00018787
		WBGene00015747	WBGene00018811
		WBGene00015752	WBGene00018812
		WBGene00015755	WBGene00018823
		WBGene00015776	WBGene00018831
		WBGene00015778	WBGene00018849
		WBGene00015781	WBGene00018864
		WBGene00015789	WBGene00018866
		WBGene00015790	WBGene00018869
		WBGene00015800	WBGene00018872
		WBGene00015801	WBGene00018874
		WBGene00015802	WBGene00018878
		WBGene00015803	WBGene00018885
		WBGene00015815	WBGene00018890
		WBGene00015868	WBGene00018892
		WBGene00015913	WBGene00018893
		WBGene00015926	WBGene00018897
		WBGene00015928	WBGene00018925
		WBGene00015942	WBGene00018951
		WBGene00015946	WBGene00018953
		WBGene00015947	WBGene00018967
		WBGene00015948	WBGene00018971
		WBGene00015954	WBGene00018984
		WBGene00015955	WBGene00018998
		WBGene00015974	WBGene00019001
		WBGene00015981	WBGene00019004
		WBGene00016021	WBGene00019007
		WBGene00016022	WBGene00019057
		WBGene00016028	WBGene00019061
		WBGene00016034	WBGene00019077
		WBGene00016048	WBGene00019102
		WBGene00016055	WBGene00019121
		WBGene00016060	WBGene00019122
		WBGene00016062	WBGene00019126
		WBGene00016073	WBGene00019127
		WBGene00016097	WBGene00019164
		WBGene00016099	WBGene00019213
		WBGene00016101	WBGene00019237
		WBGene00016112	WBGene00019246
		WBGene00016113	WBGene00019249
		WBGene00016114	WBGene00019259
		WBGene00016115	WBGene00019270
		WBGene00016116	WBGene00019273
		WBGene00016118	WBGene00019298
		WBGene00016123	WBGene00019305
		WBGene00016125	WBGene00019320
		WBGene00016139	WBGene00019326
		WBGene00016142	WBGene00019327
		WBGene00016143	WBGene00019334
		WBGene00016146	WBGene00019345
		WBGene00016154	WBGene00019351
		WBGene00016157	WBGene00019368
		WBGene00016166	WBGene00019373
		WBGene00016167	WBGene00019381
		WBGene00016178	WBGene00019399
		WBGene00016190	WBGene00019401
		WBGene00016192	WBGene00019402
		WBGene00016195	WBGene00019411
		WBGene00016201	WBGene00019427
		WBGene00016209	WBGene00019435
		WBGene00016210	WBGene00019457
		WBGene00016217	WBGene00019464
		WBGene00016237	WBGene00019465
		WBGene00016238	WBGene00019466
		WBGene00016244	WBGene00019490
		WBGene00016260	WBGene00019492
		WBGene00016263	WBGene00019495
		WBGene00016266	WBGene00019503
		WBGene00016269	WBGene00019521
		WBGene00016278	WBGene00019537
		WBGene00016289	WBGene00019543
		WBGene00016311	WBGene00019546
		WBGene00016313	WBGene00019572
		WBGene00016315	WBGene00019592
		WBGene00016316	WBGene00019599
		WBGene00016321	WBGene00019605
		WBGene00016323	WBGene00019606
		WBGene00016325	WBGene00019615
		WBGene00016331	WBGene00019617
		WBGene00016335	WBGene00019620
		WBGene00016341	WBGene00019628
		WBGene00016362	WBGene00019629
		WBGene00016378	WBGene00019645
		WBGene00016384	WBGene00019656
		WBGene00016387	WBGene00019673
		WBGene00016390	WBGene00019674
		WBGene00016393	WBGene00019678
		WBGene00016395	WBGene00019679
		WBGene00016400	WBGene00019680
		WBGene00016406	WBGene00019682
		WBGene00016407	WBGene00019686
		WBGene00016422	WBGene00019693
		WBGene00016434	WBGene00019697
		WBGene00016435	WBGene00019713
		WBGene00016442	WBGene00019716
		WBGene00016443	WBGene00019743
		WBGene00016444	WBGene00019744
		WBGene00016447	WBGene00019747
		WBGene00016449	WBGene00019748
		WBGene00016452	WBGene00019760
		WBGene00016458	WBGene00019779
		WBGene00016500	WBGene00019803
		WBGene00016507	WBGene00019872
		WBGene00016508	WBGene00019890
		WBGene00016530	WBGene00019895
		WBGene00016562	WBGene00019900
		WBGene00016564	WBGene00019915
		WBGene00016583	WBGene00019937
		WBGene00016588	WBGene00019953
		WBGene00016591	WBGene00019957
		WBGene00016599	WBGene00019967
		WBGene00016601	WBGene00019971
		WBGene00016606	WBGene00019973
		WBGene00016607	WBGene00019978
		WBGene00016608	WBGene00019986
		WBGene00016609	WBGene00020007
		WBGene00016616	WBGene00020022
		WBGene00016622	WBGene00020029
		WBGene00016632	WBGene00020031
		WBGene00016635	WBGene00020033
		WBGene00016642	WBGene00020082
		WBGene00016643	WBGene00020092
		WBGene00016650	WBGene00020093
		WBGene00016652	WBGene00020102
		WBGene00016658	WBGene00020107
		WBGene00016663	WBGene00020146
		WBGene00016664	WBGene00020158
		WBGene00016676	WBGene00020166
		WBGene00016678	WBGene00020169
		WBGene00016684	WBGene00020184
		WBGene00016710	WBGene00020195
		WBGene00016739	WBGene00020207
		WBGene00016741	WBGene00020209
		WBGene00016749	WBGene00020245
		WBGene00016763	WBGene00020246
		WBGene00016781	WBGene00020258
		WBGene00016783	WBGene00020263
		WBGene00016788	WBGene00020268
		WBGene00016791	WBGene00020273
		WBGene00016794	WBGene00020274
		WBGene00016796	WBGene00020275
		WBGene00016808	WBGene00020280
		WBGene00016810	WBGene00020284
		WBGene00016837	WBGene00020297
		WBGene00016848	WBGene00020300
		WBGene00016849	WBGene00020307
		WBGene00016866	WBGene00020315
		WBGene00016874	WBGene00020334
		WBGene00016879	WBGene00020340
		WBGene00016890	WBGene00020346
		WBGene00016900	WBGene00020347
		WBGene00016905	WBGene00020348
		WBGene00016906	WBGene00020360
		WBGene00016913	WBGene00020366
		WBGene00016916	WBGene00020374
		WBGene00016942	WBGene00020382
		WBGene00016975	WBGene00020391
		WBGene00016987	WBGene00020392
		WBGene00017011	WBGene00020393
		WBGene00017023	WBGene00020398
		WBGene00017025	WBGene00020401
		WBGene00017044	WBGene00020423
		WBGene00017053	WBGene00020441
		WBGene00017063	WBGene00020449
		WBGene00017066	WBGene00020455
		WBGene00017076	WBGene00020456
		WBGene00017080	WBGene00020480
		WBGene00017087	WBGene00020481
		WBGene00017098	WBGene00020486
		WBGene00017127	WBGene00020499
		WBGene00017128	WBGene00020504
		WBGene00017159	WBGene00020507
		WBGene00017162	WBGene00020509
		WBGene00017165	WBGene00020511
		WBGene00017169	WBGene00020553
		WBGene00017193	WBGene00020556
		WBGene00017195	WBGene00020557
		WBGene00017197	WBGene00020576
		WBGene00017210	WBGene00020577
		WBGene00017241	WBGene00020579
		WBGene00017245	WBGene00020628
		WBGene00017258	WBGene00020647
		WBGene00017275	WBGene00020649
		WBGene00017286	WBGene00020662
		WBGene00017293	WBGene00020679
		WBGene00017298	WBGene00020683
		WBGene00017300	WBGene00020695
		WBGene00017303	WBGene00020717
		WBGene00017307	WBGene00020719
		WBGene00017316	WBGene00020721
		WBGene00017317	WBGene00020725
		WBGene00017319	WBGene00020762
		WBGene00017321	WBGene00020763
		WBGene00017328	WBGene00020781
		WBGene00017340	WBGene00020788
		WBGene00017342	WBGene00020799
		WBGene00017344	WBGene00020801
		WBGene00017355	WBGene00020812
		WBGene00017357	WBGene00020821
		WBGene00017358	WBGene00020822
		WBGene00017362	WBGene00020824
		WBGene00017380	WBGene00020827
		WBGene00017390	WBGene00020831
		WBGene00017423	WBGene00020837
		WBGene00017427	WBGene00020839
		WBGene00017440	WBGene00020847
		WBGene00017445	WBGene00020866
		WBGene00017447	WBGene00020868
		WBGene00017478	WBGene00020895
		WBGene00017506	WBGene00020903
		WBGene00017513	WBGene00020915
		WBGene00017515	WBGene00020930
		WBGene00017541	WBGene00020931
		WBGene00017565	WBGene00020932
		WBGene00017571	WBGene00020936
		WBGene00017574	WBGene00020937
		WBGene00017582	WBGene00020949
		WBGene00017592	WBGene00020954
		WBGene00017597	WBGene00021020
		WBGene00017599	WBGene00021035
		WBGene00017608	WBGene00021048
		WBGene00017613	WBGene00021060
		WBGene00017646	WBGene00021068
		WBGene00017653	WBGene00021079
		WBGene00017659	WBGene00021088
		WBGene00017660	WBGene00021097
		WBGene00017666	WBGene00021112
		WBGene00017671	WBGene00021148
		WBGene00017676	WBGene00021205
		WBGene00017699	WBGene00021237
		WBGene00017717	WBGene00021248
		WBGene00017726	WBGene00021253
		WBGene00017727	WBGene00021262
		WBGene00017733	WBGene00021286
		WBGene00017742	WBGene00021292
		WBGene00017749	WBGene00021295
		WBGene00017750	WBGene00021305
		WBGene00017757	WBGene00021316
		WBGene00017760	WBGene00021322
		WBGene00017763	WBGene00021325
		WBGene00017771	WBGene00021334
		WBGene00017772	WBGene00021347
		WBGene00017773	WBGene00021350
		WBGene00017776	WBGene00021352
		WBGene00017781	WBGene00021354
		WBGene00017782	WBGene00021370
		WBGene00017786	WBGene00021371
		WBGene00017799	WBGene00021420
		WBGene00017801	WBGene00021427
		WBGene00017813	WBGene00021460
		WBGene00017825	WBGene00021466
		WBGene00017826	WBGene00021470
		WBGene00017828	WBGene00021503
		WBGene00017831	WBGene00021534
		WBGene00017837	WBGene00021539
		WBGene00017840	WBGene00021543
		WBGene00017850	WBGene00021546
[truncated: 654 more rows]

## Sheet: D
[Intestinal_data]	[HPL-2 int]	[HPL-1 int]	[Intestinal_data] and [HPL-1 int]	[HPL-2 int] and [HPL-1 int]	[Intestinal_data] and [HPL-2 int] and [HPL-1 int]	[Intestinal_data] and [HPL-2 int]
WBGene00000031	WBGene00013232	WBGene00001702	WBGene00003044	WBGene00006571	WBGene00000625	WBGene00001077
WBGene00000090	WBGene00013242	WBGene00018141	WBGene00006470	WBGene00013044	WBGene00002915	WBGene00001946
WBGene00000202	WBGene00013544	WBGene00021579	WBGene00011891	WBGene00007209	WBGene00020408	WBGene00003959
WBGene00000274	WBGene00013545	WBGene00017483	WBGene00019677	WBGene00014179	WBGene00012404	WBGene00004123
WBGene00000407	WBGene00013549	WBGene00020976	WBGene00044553	WBGene00000674	WBGene00021116	WBGene00006565
WBGene00000448	WBGene00013036	WBGene00017923	WBGene00003136	WBGene00021011	WBGene00001080	WBGene00006882
WBGene00000463	WBGene00013912	WBGene00044482	WBGene00008017	WBGene00000676	WBGene00013878	WBGene00006926
WBGene00000512	WBGene00012552	WBGene00017116	WBGene00008629	WBGene00000677	WBGene00044689	WBGene00012125
WBGene00000541	WBGene00006804	WBGene00016291	WBGene00009854	WBGene00044462	WBGene00000083	WBGene00019774
WBGene00000684	WBGene00001457	WBGene00019055	WBGene00021256	WBGene00019540	WBGene00001251	WBGene00022501
WBGene00000711	WBGene00012711	WBGene00000820	WBGene00044331	WBGene00022298	WBGene00001488	WBGene00007675
WBGene00000735	WBGene00000672	WBGene00015937	WBGene00000022	WBGene00019875	WBGene00001714	WBGene00008976
WBGene00000795	WBGene00012721	WBGene00000687	WBGene00001527	WBGene00019785	WBGene00001855	WBGene00015371
WBGene00000818	WBGene00012720	WBGene00016398	WBGene00009584	WBGene00022090	WBGene00002179	WBGene00017947
WBGene00001020	WBGene00012806	WBGene00018901	WBGene00010079	WBGene00021871	WBGene00003589	WBGene00000081
WBGene00001085	WBGene00011478	WBGene00018900	WBGene00010435	WBGene00001548	WBGene00003891	WBGene00000281
WBGene00001094	WBGene00011735	WBGene00019901	WBGene00010503	WBGene00003884	WBGene00006585	WBGene00000693
WBGene00001224	WBGene00011736	WBGene00016698	WBGene00011182	WBGene00018547	WBGene00007934	WBGene00000754
WBGene00001284	WBGene00000675	WBGene00015573	WBGene00011729	WBGene00018065	WBGene00008878	WBGene00001008
WBGene00001368	WBGene00015993	WBGene00006220	WBGene00013273	WBGene00022679	WBGene00009724	WBGene00001604
WBGene00001443	WBGene00021945	WBGene00016182	WBGene00016494	WBGene00016953	WBGene00011522	WBGene00001854
WBGene00001815	WBGene00021939	WBGene00012118	WBGene00018488	WBGene00016845	WBGene00012020	WBGene00003234
WBGene00001835	WBGene00019067	WBGene00045183	WBGene00019188	WBGene00008033	WBGene00012452	WBGene00003709
WBGene00001880	WBGene00016636	WBGene00000594	WBGene00000156	WBGene00010712	WBGene00013266	WBGene00004003
WBGene00001909	WBGene00022427	WBGene00013881	WBGene00000253	WBGene00013642	WBGene00013481	WBGene00006513
WBGene00001934	WBGene00000679	WBGene00001653	WBGene00000277	WBGene00013651	WBGene00018786	WBGene00006777
WBGene00002021	WBGene00000680	WBGene00004228	WBGene00000528	WBGene00020707	WBGene00019513	WBGene00006796
WBGene00002032	WBGene00016427	WBGene00009035	WBGene00000872	WBGene00018824	WBGene00021296	WBGene00008622
WBGene00002100	WBGene00000681	WBGene00011727	WBGene00001187	WBGene00017174	WBGene00004014	WBGene00009064
WBGene00002120	WBGene00019536	WBGene00009547	WBGene00001208	WBGene00017173	WBGene00004075	WBGene00009374
WBGene00002234	WBGene00000682	WBGene00002827	WBGene00001232	WBGene00000478	WBGene00004980	WBGene00012343
WBGene00002270	WBGene00000683	WBGene00010666	WBGene00001451	WBGene00020241	WBGene00008720	WBGene00012395
WBGene00002324	WBGene00022300	WBGene00007732	WBGene00001996	WBGene00018552	WBGene00010769	WBGene00013001
WBGene00002957	WBGene00021430	WBGene00004424	WBGene00002222	WBGene00017986	WBGene00011304	WBGene00016045
WBGene00003186	WBGene00022101	WBGene00004333	WBGene00003936	WBGene00022015	WBGene00012253	WBGene00020696
WBGene00003235	WBGene00002243	WBGene00012191	WBGene00004063	WBGene00003994	WBGene00013011	WBGene00021208
WBGene00003249	WBGene00021893	WBGene00012090	WBGene00006406	WBGene00015366	WBGene00013448	WBGene00021369
WBGene00003410	WBGene00022070	WBGene00023520	WBGene00006784	WBGene00000715	WBGene00019368	WBGene00021469
WBGene00003429	WBGene00022064	WBGene00012159	WBGene00006914	WBGene00003849	WBGene00020954	WBGene00021763
WBGene00003458	WBGene00021087	WBGene00235300	WBGene00007260	WBGene00011536	WBGene00021035	WBGene00021869
WBGene00003507	WBGene00018330	WBGene00011371	WBGene00007944	WBGene00008396	WBGene00021986	WBGene00022060
WBGene00003548	WBGene00001692	WBGene00018010	WBGene00008010	WBGene00044193	WBGene00022712	WBGene00022100
WBGene00003580	WBGene00006383	WBGene00021451	WBGene00008183	WBGene00011948		WBGene00022139
WBGene00003619	WBGene00021381	WBGene00019452	WBGene00008233	WBGene00006375		WBGene00022389
WBGene00003785	WBGene00000481	WBGene00022756	WBGene00009116	WBGene00000782		WBGene00044488
WBGene00003789	WBGene00021358	WBGene00005687	WBGene00009479	WBGene00013628		WBGene00045272
WBGene00003822	WBGene00019545	WBGene00005896	WBGene00009654	WBGene00009196		WBGene00000018
WBGene00003878	WBGene00006970	WBGene00006268	WBGene00010056	WBGene00009572		WBGene00000113
WBGene00003914	WBGene00021581	WBGene00016686	WBGene00010283	WBGene00009296		WBGene00000254
WBGene00004184	WBGene00019531	WBGene00005634	WBGene00010868	WBGene00008984		WBGene00000415
WBGene00004217	WBGene00019530	WBGene00018055	WBGene00010918	WBGene00012304		WBGene00000545
WBGene00004256	WBGene00000611	WBGene00018056	WBGene00011590	WBGene00050893		WBGene00000565
WBGene00004400	WBGene00000610	WBGene00015886	WBGene00011648	WBGene00012574		WBGene00000603
WBGene00004412	WBGene00017482	WBGene00020612	WBGene00011888	WBGene00005419		WBGene00000616
WBGene00004414	WBGene00020977	WBGene00005423	WBGene00012117	WBGene00013950		WBGene00000712
WBGene00004415	WBGene00022680	WBGene00019179	WBGene00012149	WBGene00013953		WBGene00000732
WBGene00004416	WBGene00000685	WBGene00018539	WBGene00012185	WBGene00013954		WBGene00001101
WBGene00004417	WBGene00017924	WBGene00019470	WBGene00012530	WBGene00013944		WBGene00001397
WBGene00004418	WBGene00006053	WBGene00005623	WBGene00014098	WBGene00005393		WBGene00001976
WBGene00004419	WBGene00004374	WBGene00021555	WBGene00015172	WBGene00077655		WBGene00002079
WBGene00004420	WBGene00020435	WBGene00019235	WBGene00015354	WBGene00045364		WBGene00002219
WBGene00004421	WBGene00019153	WBGene00017262	WBGene00015790	WBGene00010107		WBGene00002348
WBGene00004423	WBGene00000256	WBGene00000980	WBGene00016315	WBGene00008070		WBGene00002978
WBGene00004425	WBGene00006052	WBGene00044545	WBGene00016458	WBGene00077688		WBGene00003111
WBGene00004427	WBGene00000551	WBGene00022845	WBGene00016890	WBGene00012836		WBGene00003129
WBGene00004428	WBGene00004471	WBGene00019655	WBGene00017023	WBGene00013824		WBGene00003148
WBGene00004430	WBGene00019510	WBGene00020528	WBGene00017316	WBGene00013830		WBGene00003150
WBGene00004431	WBGene00011456	WBGene00006801	WBGene00017340	WBGene00001700		WBGene00003228
WBGene00004432	WBGene00000696	WBGene00005925	WBGene00017772	WBGene00001691		WBGene00003242
WBGene00004434	WBGene00000697	WBGene00015464	WBGene00018269	WBGene00012186		WBGene00003370
WBGene00004436	WBGene00000698	WBGene00005108	WBGene00020091	WBGene00019146		WBGene00003514
WBGene00004437	WBGene00011597	WBGene00016505	WBGene00021628	WBGene00000185		WBGene00003515
WBGene00004438	WBGene00007448	WBGene00017796	WBGene00021692	WBGene00006321		WBGene00003600
WBGene00004441	WBGene00009038	WBGene00018293	WBGene00021900	WBGene00002983		WBGene00003648
WBGene00004443	WBGene00010350	WBGene00003386	WBGene00022278	WBGene00009787		WBGene00003907
WBGene00004444	WBGene00010920	WBGene00016094	WBGene00044212	WBGene00010331		WBGene00003917
WBGene00004446	WBGene00000703	WBGene00000717	WBGene00000542	WBGene00019574		WBGene00003934
WBGene00004449	WBGene00009955	WBGene00044582	WBGene00000766	WBGene00021027		WBGene00003955
WBGene00004450	WBGene00007987	WBGene00017194	WBGene00000894	WBGene00302974		WBGene00003968
WBGene00004452	WBGene00000705	WBGene00005618	WBGene00002048	WBGene00022517		WBGene00004032
WBGene00004453	WBGene00000706	WBGene00011895	WBGene00002053	WBGene00022388		WBGene00004128
WBGene00004456	WBGene00000417	WBGene00013863	WBGene00002258	WBGene00022390		WBGene00004139
WBGene00004464	WBGene00004156	WBGene00009241	WBGene00003156	WBGene00022385		WBGene00004300
WBGene00004469	WBGene00000707	WBGene00009331	WBGene00003621	WBGene00021690		WBGene00004706
WBGene00004470	WBGene00013290	WBGene00000726	WBGene00003625	WBGene00022155		WBGene00004824
WBGene00004472	WBGene00044258	WBGene00010741	WBGene00004336	WBGene00185098		WBGene00004946
WBGene00004474	WBGene00000708	WBGene00001645	WBGene00004855	WBGene00022161		WBGene00005018
WBGene00004475	WBGene00010415	WBGene00008335	WBGene00006504	WBGene00022143		WBGene00006067
WBGene00004476	WBGene00000710	WBGene00008333	WBGene00006780	WBGene00044435		WBGene00006385
WBGene00004477	WBGene00012791	WBGene00000146	WBGene00007073	WBGene00021471		WBGene00006698
WBGene00004478	WBGene00013776	WBGene00000453	WBGene00007149	WBGene00019461		WBGene00006754
WBGene00004479	WBGene00219547	WBGene00003886	WBGene00007278	WBGene00021039		WBGene00006771
WBGene00004480	WBGene00013999	WBGene00014123	WBGene00007565	WBGene00013932		WBGene00009042
WBGene00004482	WBGene00003525	WBGene00011014	WBGene00007848	WBGene00005517		WBGene00009058
WBGene00004483	WBGene00044512	WBGene00011305	WBGene00008101	WBGene00009753		WBGene00009221
WBGene00004484	WBGene00021003	WBGene00007154	WBGene00008646	WBGene00219319		WBGene00009314
WBGene00004486	WBGene00022435	WBGene00045488	WBGene00008890	WBGene00001131		WBGene00010362
WBGene00004492	WBGene00019814	WBGene00010426	WBGene00011063	WBGene00008853		WBGene00010923
WBGene00004493	WBGene00021450	WBGene00219324	WBGene00011980	WBGene00008293		WBGene00011259
WBGene00004494	WBGene00005898	WBGene00008269	WBGene00012445	WBGene00012102		WBGene00011688
WBGene00004495	WBGene00005643	WBGene00011251	WBGene00013024	WBGene00009361		WBGene00011755
WBGene00004496	WBGene00020062	WBGene00013884	WBGene00015220	WBGene00012036		WBGene00012106
WBGene00004498	WBGene00019563	WBGene00010380	WBGene00015481	WBGene00014201		WBGene00012578
WBGene00004499	WBGene00021748	WBGene00010385	WBGene00015580	WBGene00006616		WBGene00012605
WBGene00004705	WBGene00019626	WBGene00004747	WBGene00015609	WBGene00013403		WBGene00012722
WBGene00004737	WBGene00022285	WBGene00006147	WBGene00017758	WBGene00014102		WBGene00012825
WBGene00004762	WBGene00020017	WBGene00006093	WBGene00018044	WBGene00008188		WBGene00012983
WBGene00004969	WBGene00021605	WBGene00012045	WBGene00018294	WBGene00006824		WBGene00013002
WBGene00004998	WBGene00018115	WBGene00009485	WBGene00018715	WBGene00013672		WBGene00013014
WBGene00005011	WBGene00021601	WBGene00009226	WBGene00018951	WBGene00009306		WBGene00013094
WBGene00006040	WBGene00044344	WBGene00007833	WBGene00019435	WBGene00006789		WBGene00013225
WBGene00006430	WBGene00021304	WBGene00219308	WBGene00019503	WBGene00004237		WBGene00013243
WBGene00006473	WBGene00021302	WBGene00013492	WBGene00019895	WBGene00013969		WBGene00013343
WBGene00006575	WBGene00006589	WBGene00194715	WBGene00020107	WBGene00017208		WBGene00013433
WBGene00006662	WBGene00018099	WBGene00013607	WBGene00021068	WBGene00018783		WBGene00013435
WBGene00006767	WBGene00018097	WBGene00009855	WBGene00022718	WBGene00019335		WBGene00013735
WBGene00006812	WBGene00016697	WBGene00009859	WBGene00022887	WBGene00019343		WBGene00013790
WBGene00006976	WBGene00021168	WBGene00005145	WBGene00044508	WBGene00001546		WBGene00013894
WBGene00006997	WBGene00044521	WBGene00013622		WBGene00020233		WBGene00014139
WBGene00007223	WBGene00018761	WBGene00013623		WBGene00017255		WBGene00015102
WBGene00007299	WBGene00018758	WBGene00006249		WBGene00004210		WBGene00015293
WBGene00007325	WBGene00302982	WBGene00005521		WBGene00019511		WBGene00016178
WBGene00007329	WBGene00020962	WBGene00009906		WBGene00015200		WBGene00016906
WBGene00007337	WBGene00003579	WBGene00009195		WBGene00001541		WBGene00017298
WBGene00007343	WBGene00005919	WBGene00045381		WBGene00017179		WBGene00018427
WBGene00007362	WBGene00004130	WBGene00005461		WBGene00020290		WBGene00018847
WBGene00007372	WBGene00002246	WBGene00013941		WBGene00015841		WBGene00019185
WBGene00007434	WBGene00018060	WBGene00013469		WBGene00021117		WBGene00019771
WBGene00007444	WBGene00018061	WBGene00005328		WBGene00021142		WBGene00019821
WBGene00007513	WBGene00020700	WBGene00009297		WBGene00021171		WBGene00019831
WBGene00007545	WBGene00006164	WBGene00009836		WBGene00010989		WBGene00020131
WBGene00007614	WBGene00021080	WBGene00012492		WBGene00012288		WBGene00020706
WBGene00007615	WBGene00003025	WBGene00005349		WBGene00012586		WBGene00020732
WBGene00007714	WBGene00021482	WBGene00005414		WBGene00012595		WBGene00020948
WBGene00007762	WBGene00000498	WBGene00005330		WBGene00012332		WBGene00021128
WBGene00007810	WBGene00019970	WBGene00006692		WBGene00000662		WBGene00021270
WBGene00007841	WBGene00020239	WBGene00006688		WBGene00013221		WBGene00021365
WBGene00007885	WBGene00021627	WBGene00005493		WBGene00006787		WBGene00021474
WBGene00007903	WBGene00022584	WBGene00005507		WBGene00013157		WBGene00021507
WBGene00007928	WBGene00000030	WBGene00012570		WBGene00021043		WBGene00021562
WBGene00008005	WBGene00000455	WBGene00008892		WBGene00018246		WBGene00021596
WBGene00008091	WBGene00019600	WBGene00008899		WBGene00004045		WBGene00021870
WBGene00008225	WBGene00044541	WBGene00011211		WBGene00017937		WBGene00021906
WBGene00008260	WBGene00000893	WBGene00011212		WBGene00020550		WBGene00022040
WBGene00008565	WBGene00000713	WBGene00012575		WBGene00019328		WBGene00022134
WBGene00008584	WBGene00000244	WBGene00013483		WBGene00015268		WBGene00022148
WBGene00008598	WBGene00000714	WBGene00194680		WBGene00020116		WBGene00022382
WBGene00008670	WBGene00018292	WBGene00013971		WBGene00020117		WBGene00022452
WBGene00008681	WBGene00000718	WBGene00195058		WBGene00021853		WBGene00044068
WBGene00008726	WBGene00011573	WBGene00013586		WBGene00019997		WBGene00000067
WBGene00008750	WBGene00000722	WBGene00012689		WBGene00020104		WBGene00000106
WBGene00008793	WBGene00000724	WBGene00008066		WBGene00021808		WBGene00000114
WBGene00008832	WBGene00000602	WBGene00005832		WBGene00000666		WBGene00000123
WBGene00008926	WBGene00000601	WBGene00012818		WBGene00010974		WBGene00000160
WBGene00009010	WBGene00011715	WBGene00012250		WBGene00008422		WBGene00000472
WBGene00009138	WBGene00000614	WBGene00044655		WBGene00013445		WBGene00001137
WBGene00009284	WBGene00000733	WBGene00008946		WBGene00012761		WBGene00001412
WBGene00009441	WBGene00007082	WBGene00013834		WBGene00194733		WBGene00001561
WBGene00009581	WBGene00044109	WBGene00013832				WBGene00001564
WBGene00009665	WBGene00044194	WBGene00013771				WBGene00001999
WBGene00009779	WBGene00011132	WBGene00005392				WBGene00002005
WBGene00009919	WBGene00011942	WBGene00009760				WBGene00002187
WBGene00009981	WBGene00009031	WBGene00009762				WBGene00002264
WBGene00010192	WBGene00008724	WBGene00000484				WBGene00003495
WBGene00010234	WBGene00012315	WBGene00015138				WBGene00003794
WBGene00010267	WBGene00045382	WBGene00017896				WBGene00003834
WBGene00010285	WBGene00009299	WBGene00003408				WBGene00003948
WBGene00010338	WBGene00009834	WBGene00017780				WBGene00004076
WBGene00010406	WBGene00012405	WBGene00016485				WBGene00004147
WBGene00010456	WBGene00006150	WBGene00001237				WBGene00004167
WBGene00010502	WBGene00011254	WBGene00022508				WBGene00004272
WBGene00010595	WBGene00005500	WBGene00001569				WBGene00004388
WBGene00010773	WBGene00008441	WBGene00044621				WBGene00004698
WBGene00010869	WBGene00007853	WBGene00018738				WBGene00004702
WBGene00011000	WBGene00005397	WBGene00001551				WBGene00004736
WBGene00011037	WBGene00013489	WBGene00018744				WBGene00004755
WBGene00011047	WBGene00013487	WBGene00000175				WBGene00004804
WBGene00011081	WBGene00013973	WBGene00006948				WBGene00004945
WBGene00011337	WBGene00013583	WBGene00001400				WBGene00004951
WBGene00011404	WBGene00009016	WBGene00006952				WBGene00006414
WBGene00011511	WBGene00009021	WBGene00020845				WBGene00006536
WBGene00011548	WBGene00007583	WBGene00020567				WBGene00006769
WBGene00011771	WBGene00012808	WBGene00022499				WBGene00006786
WBGene00011965	WBGene00012809	WBGene00021319				WBGene00006925
WBGene00011976	WBGene00012815	WBGene00020672				WBGene00006930
WBGene00012128	WBGene00007177	WBGene00018514				WBGene00007017
WBGene00012201	WBGene00013765	WBGene00006424				WBGene00007064
WBGene00012429	WBGene00005147	WBGene00015625				WBGene00007195
WBGene00012796	WBGene00007126	WBGene00000741				WBGene00007350
WBGene00012885	WBGene00000736	WBGene00020506				WBGene00008610
WBGene00012942	WBGene00022203	WBGene00016976				WBGene00009188
WBGene00013106	WBGene00015430	WBGene00006746				WBGene00010070
WBGene00013119	WBGene00004377	WBGene00015865				WBGene00010296
WBGene00013137	WBGene00020494	WBGene00020335				WBGene00010419
WBGene00013214	WBGene00018938	WBGene00018607				WBGene00010806
WBGene00013235	WBGene00019436	WBGene00018485				WBGene00011051
WBGene00013418	WBGene00006955	WBGene00004335				WBGene00011474
WBGene00013461	WBGene00219451	WBGene00018227				WBGene00011638
WBGene00013591	WBGene00000737	WBGene00018283				WBGene00012187
WBGene00013696	WBGene00001065	WBGene00019148				WBGene00012193
WBGene00013901	WBGene00018589	WBGene00017569				WBGene00012306
WBGene00013988	WBGene00020767	WBGene00011643				WBGene00012717
WBGene00014031	WBGene00044901	WBGene00003553				WBGene00012768
WBGene00014092	WBGene00019735	WBGene00011462				WBGene00012769
WBGene00014108	WBGene00006408	WBGene00010224				WBGene00012903
WBGene00014223	WBGene00000033	WBGene00007957				WBGene00012943
WBGene00015008	WBGene00018024	WBGene00219301				WBGene00013379
WBGene00015011	WBGene00000738	WBGene00012303				WBGene00015116
WBGene00015141	WBGene00018877	WBGene00004008				WBGene00015143
WBGene00015157	WBGene00000066	WBGene00008901				WBGene00015168
WBGene00015510	WBGene00044299	WBGene00004108				WBGene00015676
WBGene00015516	WBGene00001070	WBGene00007750				WBGene00016030
WBGene00015525	WBGene00002125	WBGene00013496				WBGene00016173
WBGene00015769	WBGene00000739	WBGene00007664				WBGene00017735
WBGene00016417	WBGene00000742	WBGene00010434				WBGene00017834
WBGene00016533	WBGene00000744	WBGene00001148				WBGene00018145
WBGene00016589	WBGene00020884	WBGene00007486				WBGene00019273
WBGene00016592	WBGene00000746	WBGene00007523				WBGene00019537
WBGene00016731	WBGene00004949	WBGene00020794				WBGene00019743
WBGene00016877	WBGene00006588	WBGene00000294				WBGene00020245
WBGene00016965	WBGene00017714	WBGene00018310				WBGene00020391
WBGene00016971	WBGene00017401	WBGene00022032				WBGene00020455
WBGene00017003	WBGene00006587	WBGene00044434				WBGene00020511
WBGene00017041	WBGene00022315	WBGene00020283				WBGene00020679
WBGene00017082	WBGene00011763	WBGene00001773				WBGene00020936
WBGene00017103	WBGene00013871	WBGene00021007				WBGene00021371
WBGene00017126	WBGene00000749	WBGene00022112				WBGene00021460
WBGene00017144	WBGene00011880	WBGene00003422				WBGene00022037
WBGene00017160	WBGene00001690	WBGene00000284				WBGene00022046
WBGene00017161	WBGene00001981	WBGene00017026				WBGene00022069
WBGene00017284	WBGene00000753	WBGene00044423				WBGene00022078
WBGene00017372	WBGene00010067	WBGene00001430				WBGene00022276
WBGene00017438	WBGene00044149	WBGene00003072				WBGene00022286
WBGene00017530	WBGene00003623	WBGene00017909				WBGene00022739
WBGene00017534	WBGene00010690	WBGene00003029
WBGene00017536	WBGene00000756	WBGene00003516
WBGene00017686	WBGene00006517	WBGene00016605
WBGene00017797	WBGene00001898	WBGene00016565
WBGene00017969	WBGene00006634	WBGene00006058
WBGene00017974	WBGene00001096	WBGene00016733
WBGene00018005	WBGene00000618	WBGene00001833
WBGene00018045	WBGene00011683	WBGene00016327
WBGene00018274	WBGene00007877	WBGene00015096
WBGene00018316	WBGene00007878	WBGene00004965
WBGene00018635	WBGene00007484	WBGene00185086
WBGene00018804	WBGene00002280	WBGene00018895
WBGene00018926	WBGene00020770	WBGene00020419
WBGene00018948	WBGene00018192	WBGene00022634
WBGene00018996	WBGene00022275	WBGene00020659
WBGene00019006	WBGene00021681	WBGene00006423
WBGene00019509	WBGene00000622	WBGene00011061
WBGene00019520	WBGene00003229	WBGene00007742
WBGene00019644	WBGene00020088	WBGene00007911
WBGene00019660	WBGene00020090	WBGene00008531
WBGene00019940	WBGene00021028	WBGene00219283
WBGene00019963	WBGene00001725	WBGene00009343
WBGene00020003	WBGene00022029	WBGene00002142
WBGene00020270	WBGene00022026	WBGene00014965
WBGene00020443	WBGene00000624	WBGene00010324
WBGene00020478	WBGene00021213	WBGene00206530
WBGene00020516	WBGene00020281	WBGene00044250
WBGene00020630	WBGene00022386	WBGene00004509
WBGene00020742	WBGene00022391	WBGene00008783
WBGene00020757	WBGene00021333	WBGene00009607
WBGene00020953	WBGene00021328	WBGene00010168
WBGene00021146	WBGene00001745	WBGene00010170
WBGene00021269	WBGene00004429	WBGene00011657
WBGene00021391	WBGene00271777	WBGene00008472
WBGene00021535	WBGene00021693	WBGene00010768
WBGene00021709	WBGene00044896	WBGene00003578
WBGene00021880	WBGene00022274	WBGene00012477
WBGene00021894	WBGene00044347	WBGene00012500
WBGene00022107	WBGene00022140	WBGene00012505
WBGene00022117	WBGene00021239	WBGene00008909
WBGene00022230	WBGene00021346	WBGene00014235
WBGene00022258	WBGene00021472	WBGene00014196
WBGene00022415	WBGene00077563	WBGene00009695
WBGene00022592	WBGene00021473	WBGene00010808
WBGene00022737	WBGene00017736	WBGene00011433
WBGene00022753	WBGene00016950	WBGene00014101
WBGene00022835	WBGene00006047	WBGene00001147
WBGene00023489	WBGene00004226	WBGene00009304
WBGene00044061	WBGene00000832	WBGene00020835
WBGene00044457	WBGene00021271	WBGene00021101
WBGene00044684	WBGene00023172	WBGene00021092
WBGene00000007	WBGene00018232	WBGene00020205
WBGene00000073	WBGene00017978	WBGene00021576
WBGene00000075	WBGene00022126	WBGene00019700
WBGene00000084	WBGene00022133	WBGene00019313
WBGene00000139	WBGene00021837	WBGene00018575
WBGene00000375	WBGene00004775	WBGene00018816
WBGene00000412	WBGene00021639	WBGene00015595
WBGene00000539	WBGene00045399	WBGene00194714
WBGene00000803	WBGene00000368	WBGene00019036
WBGene00000870	WBGene00021630	WBGene00019042
WBGene00000923	WBGene00016561	WBGene00018442
WBGene00000968	WBGene00021113	WBGene00018439
WBGene00001158	WBGene00017885	WBGene00018437
WBGene00001248	WBGene00001599	WBGene00269388
WBGene00001468	WBGene00003622	WBGene00305113
WBGene00001477	WBGene00003777	WBGene00269389
WBGene00001867	WBGene00011376	WBGene00016882
WBGene00001997	WBGene00009457	WBGene00015827
WBGene00002124	WBGene00002226	WBGene00022685
WBGene00002299	WBGene00010612	WBGene00022690
WBGene00002804	WBGene00009113	WBGene00206415
WBGene00003094	WBGene00015024	WBGene00017213
WBGene00003233	WBGene00013125	WBGene00016547
WBGene00003572	WBGene00013127	WBGene00016337
WBGene00003612	WBGene00013181	WBGene00019586
WBGene00003670	WBGene00013180	WBGene00271744
WBGene00003686	WBGene00010157	WBGene00235164
WBGene00003699	WBGene00007768	WBGene00019591
WBGene00003700	WBGene00010654	WBGene00017527
WBGene00003705	WBGene00008854	WBGene00018019
WBGene00003715	WBGene00001045	WBGene00020229
WBGene00003719	WBGene00013135	WBGene00019687
WBGene00003757	WBGene00013138	WBGene00022442
WBGene00003835	WBGene00305049	WBGene00016574
WBGene00004193	WBGene00010246	WBGene00005543
WBGene00004353	WBGene00007603	WBGene00305132
WBGene00004777	WBGene00009611	WBGene00021298
WBGene00004893	WBGene00011658	WBGene00017452
WBGene00004959	WBGene00012105	WBGene00305091
WBGene00005021	WBGene00012107	WBGene00019795
WBGene00005189	WBGene00004181	WBGene00019794
WBGene00005712	WBGene00012209	WBGene00020777
WBGene00006272	WBGene00012480	WBGene00018810
WBGene00006464	WBGene00011434	WBGene00016778
WBGene00006466	WBGene00012387	WBGene00017944
WBGene00006696	WBGene00012238	WBGene00015134
WBGene00006971	WBGene00013502	WBGene00016355
WBGene00007131	WBGene00009824	WBGene00019086
WBGene00007152	WBGene00007988	WBGene00017291
WBGene00007220	WBGene00005078	WBGene00000935
WBGene00007322	WBGene00009865	WBGene00019410
WBGene00007392	WBGene00000034	WBGene00018873
WBGene00007417	WBGene00016075	WBGene00019426
WBGene00007453	WBGene00019498	WBGene00019905
WBGene00007536	WBGene00020171	WBGene00015795
WBGene00007548	WBGene00018496	WBGene00001872
WBGene00007691	WBGene00235351	WBGene00016277
WBGene00007716	WBGene00000617	WBGene00018394
WBGene00007724	WBGene00020326	WBGene00006947
WBGene00007771	WBGene00020328	WBGene00006363
WBGene00007840	WBGene00022553	WBGene00008435
WBGene00007856	WBGene00003734	WBGene00003241
WBGene00007867	WBGene00018433	WBGene00004264
WBGene00007906	WBGene00017055	WBGene00009901
WBGene00007963	WBGene00020231	WBGene00195147
WBGene00007973	WBGene00044367	WBGene00008803
WBGene00008099	WBGene00022443	WBGene00011579
WBGene00008246	WBGene00022714	WBGene00007690
WBGene00008263	WBGene00020430	WBGene00007374
WBGene00008309	WBGene00016576	WBGene00008458
WBGene00008352	WBGene00016575	WBGene00014246
WBGene00008353	WBGene00005540	WBGene00014171
WBGene00008407	WBGene00020407	WBGene00000655
WBGene00008483	WBGene00005544	WBGene00002297
WBGene00008485	WBGene00005590	WBGene00009354
WBGene00008593	WBGene00015909	WBGene00011530
WBGene00008595	WBGene00018196	WBGene00007342
WBGene00008692	WBGene00017451	WBGene00008545
WBGene00008709	WBGene00021730	WBGene00009657
WBGene00008730	WBGene00017557	WBGene00012085
WBGene00008774	WBGene00015848	WBGene00013255
WBGene00008830	WBGene00303369	WBGene00012585
WBGene00008849	WBGene00000647	WBGene00012592
WBGene00008871	WBGene00019793	WBGene00045289
WBGene00008891	WBGene00017587	WBGene00012199
WBGene00008945	WBGene00017584	WBGene00001133
WBGene00009156	WBGene00016709	WBGene00000037
WBGene00009190	WBGene00020771	WBGene00011050
WBGene00009212	WBGene00001948	WBGene00011049
WBGene00009258	WBGene00003424	WBGene00010194
WBGene00009329	WBGene00000606	WBGene00018243
WBGene00009335	WBGene00000609	WBGene00018248
WBGene00009395	WBGene00000649	WBGene00018363
WBGene00009403	WBGene00003456	WBGene00000895
WBGene00009490	WBGene00003469	WBGene00022322
WBGene00009495	WBGene00015796	WBGene00022344
WBGene00009522	WBGene00002265	WBGene00010451
WBGene00009560	WBGene00000251	WBGene00009502
WBGene00009696	WBGene00000657	WBGene00007138
WBGene00009840	WBGene00000851	WBGene00303105
WBGene00010062	WBGene00005016	WBGene00000396
WBGene00010068	WBGene00010053	WBGene00022598
WBGene00010134	WBGene00013926	WBGene00016199
WBGene00010189	WBGene00012148	WBGene00015637
WBGene00010215	WBGene00008743	WBGene00017950
WBGene00010229	WBGene00002262	WBGene00003497
WBGene00010256	WBGene00012222	WBGene00022816
WBGene00010328	WBGene00012219	WBGene00045247
WBGene00010522	WBGene00012457	WBGene00015557
WBGene00010572	WBGene00013260	WBGene00000939
WBGene00010619	WBGene00002063	WBGene00016799
WBGene00010628	WBGene00016825	WBGene00016242
WBGene00010644	WBGene00012285	WBGene00003562
WBGene00010686	WBGene00008843	WBGene00015523
WBGene00010851	WBGene00044032	WBGene00003001
WBGene00010899	WBGene00012905	WBGene00007401
WBGene00011052	WBGene00012920	WBGene00044903
WBGene00011100	WBGene00004904	WBGene00003482
WBGene00011134	WBGene00009390	WBGene00013499
WBGene00011141	WBGene00010269	WBGene00012272
WBGene00011167	WBGene00000661	WBGene00000669
WBGene00011209	WBGene00004120	WBGene00006683
WBGene00011217	WBGene00009308	WBGene00013431
WBGene00011262	WBGene00003119	WBGene00219421
WBGene00011321	WBGene00012993	WBGene00044233
WBGene00011361	WBGene00008448	WBGene00013741
WBGene00011364	WBGene00010071	WBGene00006762
WBGene00011397	WBGene00303002	WBGene00010072
WBGene00011430	WBGene00013209	WBGene00013578
WBGene00011678	WBGene00001916	WBGene00011475
WBGene00011725	WBGene00008579	WBGene00007065
WBGene00011808	WBGene00001838	WBGene00016638
WBGene00011852	WBGene00013096	WBGene00000546
WBGene00011893	WBGene00012328	WBGene00016671
WBGene00011914	WBGene00012333	WBGene00022375
WBGene00011984	WBGene00012730	WBGene00022073
WBGene00012014	WBGene00010722
WBGene00012026	WBGene00010720
WBGene00012070	WBGene00010719
WBGene00012162	WBGene00012979
WBGene00012408	WBGene00012981
WBGene00012491	WBGene00012982
WBGene00012533	WBGene00010758
WBGene00012582	WBGene00007479
WBGene00013052	WBGene00013187
WBGene00013091	WBGene00013192
WBGene00013111	WBGene00013156
WBGene00013146	WBGene00000208
WBGene00013569	WBGene00013166
WBGene00013609	WBGene00000663
WBGene00013643	WBGene00016221
WBGene00013750	WBGene00016220
WBGene00013762	WBGene00006894
WBGene00013836	WBGene00015649
WBGene00013839	WBGene00000903
WBGene00013904	WBGene00015266
WBGene00013905	WBGene00022488
WBGene00013963	WBGene00022348
WBGene00014089	WBGene00019715
WBGene00014106	WBGene00021261
WBGene00015081	WBGene00021592
WBGene00015369	WBGene00015242
WBGene00015378	WBGene00021436
WBGene00015382	WBGene00021439
WBGene00015471	WBGene00016524
WBGene00015569	WBGene00022175
WBGene00015859	WBGene00019167
WBGene00015861	WBGene00009738
WBGene00015922	WBGene00004976
WBGene00016005	WBGene00004765
WBGene00016046	WBGene00011114
WBGene00016131	WBGene00000664
WBGene00016164	WBGene00001076
WBGene00016191	WBGene00019834
WBGene00016314	WBGene00017778
WBGene00016336	WBGene00015386
WBGene00016585	WBGene00010475
WBGene00016590	WBGene00014033
WBGene00016613	WBGene00001734
WBGene00016734	WBGene00001263
WBGene00016758	WBGene00010573
WBGene00016766	WBGene00011501
WBGene00016809	WBGene00014801
WBGene00016884	WBGene00000768
WBGene00016970	WBGene00010838
WBGene00017074	WBGene00010839
WBGene00017077	WBGene00012863
WBGene00017091	WBGene00010477
WBGene00017093	WBGene00012271
WBGene00017164	WBGene00000668
WBGene00017178	WBGene00012972
WBGene00017237	WBGene00012356
WBGene00017310	WBGene00006553
WBGene00017327	WBGene00012933
WBGene00017364	WBGene00012124
WBGene00017398	WBGene00004960
WBGene00017449	WBGene00013438
WBGene00017498	WBGene00013437
WBGene00017501	WBGene00194864
WBGene00017578	WBGene00013424
WBGene00017625	WBGene00000670
WBGene00017635	WBGene00000671
WBGene00017678	WBGene00007679
WBGene00017679
WBGene00017756
WBGene00017785
WBGene00017954
WBGene00018140
WBGene00018153
WBGene00018195
WBGene00018200
WBGene00018281
WBGene00018282
WBGene00018351
WBGene00018848
WBGene00018886
WBGene00018907
WBGene00018931
WBGene00019215
WBGene00019444
WBGene00019493
WBGene00019519
WBGene00019549
WBGene00019579
WBGene00019589
WBGene00019618
WBGene00019659
WBGene00019763
WBGene00019806
WBGene00019869
WBGene00019962
WBGene00020188
WBGene00020329
WBGene00020359
WBGene00020453
WBGene00020502
WBGene00020823
WBGene00020967
WBGene00020989
WBGene00021051
WBGene00021070
WBGene00021159
WBGene00021160
WBGene00021339
WBGene00021495
WBGene00021531
WBGene00021603
WBGene00021751
WBGene00021865
WBGene00022326
WBGene00022330
WBGene00022337
WBGene00022338
WBGene00022345
WBGene00022411
WBGene00022549
WBGene00022698
WBGene00022735
WBGene00022857
WBGene00022868
WBGene00023484
WBGene00044236
WBGene00044330
WBGene00044455
WBGene00044570
WBGene00044637
WBGene00044674
WBGene00044707
WBGene00044977
WBGene00045356
WBGene00045415
WBGene00050904
WBGene00077548
WBGene00077696
WBGene00000088
WBGene00000147
WBGene00000163
WBGene00000169
WBGene00000181
WBGene00000219
WBGene00000239
WBGene00000393
WBGene00000411
WBGene00000443
WBGene00000480
WBGene00000500
WBGene00000508
WBGene00000515
WBGene00000527
WBGene00000534
WBGene00000549
WBGene00000552
WBGene00000584
WBGene00000761
WBGene00000764
WBGene00000783
WBGene00000834
WBGene00000863
WBGene00000869
WBGene00000879
WBGene00000883
WBGene00000897
WBGene00000913
WBGene00000976
WBGene00001036
WBGene00001038
WBGene00001056
WBGene00001081
WBGene00001090
WBGene00001156
WBGene00001163
WBGene00001167
WBGene00001172
WBGene00001179
WBGene00001196
WBGene00001209
WBGene00001239
WBGene00001243
WBGene00001258
WBGene00001333
WBGene00001405
WBGene00001580
WBGene00001596
WBGene00001602
WBGene00001620
WBGene00001661
WBGene00001679
WBGene00001748
WBGene00001758
WBGene00001817
WBGene00001827
WBGene00001832
WBGene00001853
WBGene00001994
WBGene00002004
WBGene00002026
WBGene00002027
WBGene00002061
WBGene00002067
WBGene00002068
WBGene00002070
WBGene00002076
WBGene00002176
WBGene00002191
WBGene00002201
WBGene00002250
WBGene00002850
WBGene00002891
WBGene00002980
WBGene00003014
WBGene00003034
WBGene00003036
WBGene00003059
WBGene00003096
WBGene00003236
WBGene00003374
WBGene00003413
WBGene00003480
WBGene00003583
WBGene00003592
WBGene00003605
WBGene00003640
WBGene00003692
WBGene00003725
WBGene00003767
WBGene00003902
WBGene00003903
WBGene00003963
WBGene00004037
WBGene00004038
WBGene00004055
WBGene00004059
WBGene00004062
WBGene00004095
WBGene00004134
WBGene00004140
WBGene00004143
WBGene00004189
WBGene00004204
WBGene00004235
WBGene00004238
WBGene00004248
WBGene00004347
WBGene00004382
WBGene00004384
WBGene00004408
WBGene00004461
WBGene00004466
WBGene00004503
WBGene00004753
WBGene00004754
WBGene00004783
WBGene00004875
WBGene00004887
WBGene00004897
WBGene00004912
WBGene00004928
WBGene00004974
WBGene00006324
WBGene00006437
WBGene00006443
WBGene00006476
WBGene00006495
WBGene00006514
WBGene00006515
WBGene00006530
WBGene00006542
WBGene00006599
WBGene00006706
WBGene00006707
WBGene00006718
WBGene00006725
WBGene00006747
WBGene00006753
WBGene00006776
WBGene00006831
WBGene00006896
WBGene00006912
WBGene00006924
WBGene00006931
WBGene00006940
WBGene00006968
WBGene00007047
WBGene00007053
WBGene00007058
WBGene00007107
WBGene00007108
WBGene00007194
WBGene00007197
WBGene00007221
WBGene00007287
WBGene00007336
WBGene00007355
WBGene00007436
WBGene00007504
WBGene00007533
WBGene00007564
WBGene00007586
WBGene00007587
WBGene00007680
WBGene00007702
WBGene00007703
WBGene00008052
WBGene00008119
WBGene00008121
WBGene00008205
WBGene00008219
WBGene00008220
WBGene00008354
WBGene00008404
WBGene00008419
WBGene00008429
WBGene00008456
WBGene00008530
WBGene00008547
WBGene00008582
WBGene00008664
WBGene00008682
WBGene00008687
WBGene00008688
WBGene00008923
WBGene00009008
WBGene00009126
WBGene00009207
WBGene00009272
WBGene00009393
WBGene00009552
WBGene00009628
WBGene00009667
WBGene00009769
WBGene00009770
WBGene00009772
WBGene00009776
WBGene00009831
WBGene00009925
WBGene00009987
WBGene00009992
WBGene00010035
WBGene00010044
WBGene00010055
WBGene00010097
WBGene00010259
WBGene00010260
WBGene00010357
WBGene00010450
WBGene00010458
WBGene00010478
WBGene00010621
WBGene00010638
WBGene00010677
WBGene00010750
WBGene00010796
WBGene00010811
WBGene00010814
WBGene00010842
WBGene00010875
WBGene00010941
WBGene00011059
WBGene00011109
WBGene00011110
WBGene00011145
WBGene00011216
WBGene00011225
WBGene00011263
WBGene00011283
WBGene00011302
WBGene00011348
WBGene00011353
WBGene00011437
WBGene00011482
WBGene00011489
WBGene00011490
WBGene00011526
WBGene00011532
WBGene00011538
WBGene00011662
WBGene00011739
WBGene00011819
WBGene00011820
WBGene00011835
WBGene00011883
WBGene00011884
WBGene00011955
WBGene00012019
WBGene00012121
WBGene00012127
WBGene00012179
WBGene00012194
WBGene00012204
WBGene00012330
WBGene00012361
WBGene00012370
WBGene00012528
WBGene00012553
WBGene00012648
WBGene00012659
WBGene00012830
WBGene00012989
WBGene00012999
WBGene00013018
WBGene00013040
WBGene00013093
WBGene00013118
WBGene00013143
WBGene00013216
WBGene00013224
WBGene00013284
WBGene00013325
WBGene00013463
WBGene00013567
WBGene00013575
WBGene00013576
WBGene00013650
WBGene00013668
WBGene00013682
WBGene00013683
WBGene00013766
WBGene00013847
WBGene00013880
WBGene00013983
WBGene00013994
WBGene00014023
WBGene00014024
WBGene00014091
WBGene00014136
WBGene00014165
WBGene00014172
WBGene00014250
WBGene00015010
WBGene00015047
WBGene00015094
WBGene00015101
WBGene00015164
WBGene00015207
WBGene00015235
WBGene00015308
WBGene00015391
WBGene00015413
WBGene00015451
WBGene00015468
WBGene00015470
WBGene00015477
WBGene00015485
WBGene00015512
WBGene00015524
WBGene00015635
WBGene00015742
WBGene00015743
WBGene00015809
WBGene00015915
WBGene00015916
WBGene00016002
WBGene00016156
WBGene00016170
WBGene00016194
WBGene00016463
WBGene00016493
WBGene00016610
WBGene00016623
WBGene00016653
WBGene00016750
WBGene00016803
WBGene00016964
WBGene00016968
WBGene00016977
WBGene00017016
WBGene00017062
WBGene00017108
WBGene00017244
WBGene00017261
WBGene00017272
WBGene00017283
WBGene00017302
WBGene00017429
WBGene00017431
WBGene00017437
WBGene00017547
WBGene00017640
WBGene00017663
WBGene00017691
WBGene00017759
WBGene00017769
WBGene00017800
WBGene00017889
WBGene00017904
WBGene00017908
WBGene00017962
WBGene00018007
WBGene00018072
WBGene00018131
WBGene00018160
WBGene00018249
WBGene00018270
WBGene00018286
WBGene00018328
WBGene00018339
WBGene00018342
WBGene00018512
WBGene00018582
WBGene00018594
WBGene00018788
WBGene00018814
WBGene00018846
WBGene00018898
WBGene00018921
WBGene00018955
WBGene00018959
WBGene00018963
WBGene00018990
WBGene00019017
WBGene00019060
WBGene00019162
WBGene00019295
WBGene00019322
WBGene00019479
WBGene00019619
WBGene00019657
WBGene00019658
WBGene00019717
WBGene00019805
WBGene00019847
WBGene00019871
WBGene00019877
WBGene00019883
WBGene00019947
WBGene00019955
WBGene00019959
WBGene00020037
WBGene00020097
WBGene00020139
WBGene00020185
WBGene00020230
WBGene00020264
WBGene00020269
WBGene00020442
WBGene00020491
WBGene00020530
WBGene00020549
WBGene00020779
WBGene00020838
WBGene00020952
WBGene00021082
WBGene00021170
WBGene00021331
WBGene00021367
WBGene00021392
WBGene00021423
WBGene00021440
WBGene00021518
WBGene00021522
WBGene00021715
WBGene00021816
WBGene00021879
WBGene00021899
WBGene00022059
WBGene00022181
WBGene00022252
WBGene00022361
WBGene00022410
WBGene00022434
WBGene00022457
WBGene00022466
WBGene00022574
WBGene00022599
WBGene00022608
WBGene00022748
WBGene00022749
WBGene00022766
WBGene00022775
WBGene00022782
WBGene00022812
WBGene00022861
WBGene00022882
WBGene00023497
WBGene00043097
WBGene00044071
WBGene00044144
WBGene00044410
WBGene00044418
WBGene00044483
WBGene00045433
WBGene00045468
WBGene00077526
WBGene00077593
WBGene00077761
WBGene00119204
WBGene00175030
WBGene00194695
WBGene00194708
WBGene00194986
WBGene00195176
WBGene00206380
WBGene00219216
WBGene00219316
WBGene00235102
WBGene00235269
WBGene00235315
WBGene00000017
WBGene00000020
WBGene00000063
WBGene00000065
WBGene00000068
WBGene00000070
WBGene00000086
WBGene00000092
WBGene00000097
WBGene00000098
WBGene00000099
WBGene00000102
WBGene00000103
WBGene00000111
WBGene00000115
WBGene00000120
WBGene00000121
WBGene00000138
WBGene00000144
WBGene00000148
WBGene00000150
WBGene00000157
WBGene00000161
WBGene00000164
WBGene00000165
WBGene00000170
WBGene00000184
WBGene00000186
WBGene00000188
WBGene00000190
WBGene00000192
WBGene00000195
WBGene00000196
WBGene00000197
WBGene00000199
WBGene00000200
WBGene00000201
WBGene00000203
WBGene00000204
WBGene00000205
WBGene00000206
WBGene00000210
WBGene00000235
WBGene00000236
WBGene00000237
WBGene00000238
WBGene00000240
WBGene00000248
WBGene00000249
WBGene00000262
WBGene00000263
WBGene00000266
WBGene00000268
WBGene00000275
WBGene00000283
WBGene00000289
WBGene00000292
WBGene00000302
WBGene00000370
WBGene00000376
WBGene00000380
WBGene00000382
WBGene00000386
WBGene00000387
WBGene00000391
WBGene00000405
WBGene00000409
WBGene00000410
WBGene00000414
WBGene00000420
WBGene00000424
WBGene00000426
WBGene00000464
WBGene00000466
WBGene00000473
WBGene00000474
WBGene00000475
WBGene00000476
WBGene00000496
WBGene00000502
WBGene00000506
WBGene00000507
WBGene00000511
WBGene00000517
WBGene00000522
WBGene00000530
WBGene00000533
WBGene00000535
WBGene00000536
WBGene00000543
WBGene00000547
WBGene00000553
WBGene00000554
WBGene00000558
WBGene00000564
WBGene00000566
WBGene00000567
WBGene00000615
WBGene00000691
WBGene00000699
WBGene00000720
WBGene00000730
WBGene00000740
WBGene00000751
WBGene00000757
WBGene00000762
WBGene00000763
WBGene00000777
WBGene00000779
WBGene00000794
WBGene00000796
WBGene00000812
WBGene00000814
WBGene00000815
WBGene00000816
WBGene00000822
WBGene00000836
WBGene00000837
WBGene00000838
WBGene00000839
WBGene00000841
WBGene00000854
WBGene00000865
WBGene00000868
WBGene00000874
WBGene00000884
WBGene00000887
WBGene00000888
WBGene00000890
WBGene00000891
WBGene00000892
WBGene00000896
WBGene00000898
WBGene00000900
WBGene00000908
WBGene00000929
WBGene00000931
WBGene00000937
WBGene00000941
WBGene00000958
WBGene00000959
WBGene00000961
WBGene00000963
WBGene00000970
WBGene00000973
WBGene00000983
WBGene00000985
WBGene00000988
WBGene00000992
WBGene00001000
WBGene00001001
WBGene00001018
WBGene00001022
WBGene00001027
WBGene00001028
WBGene00001032
WBGene00001033
WBGene00001040
WBGene00001041
WBGene00001042
WBGene00001048
WBGene00001051
WBGene00001060
WBGene00001066
WBGene00001074
WBGene00001078
WBGene00001082
WBGene00001087
WBGene00001088
WBGene00001113
WBGene00001151
WBGene00001153
WBGene00001161
WBGene00001186
WBGene00001229
WBGene00001230
WBGene00001231
WBGene00001233
WBGene00001235
WBGene00001236
WBGene00001249
WBGene00001324
WBGene00001325
WBGene00001331
WBGene00001334
WBGene00001336
WBGene00001365
WBGene00001366
WBGene00001371
WBGene00001386
WBGene00001389
WBGene00001391
WBGene00001404
WBGene00001406
WBGene00001425
WBGene00001439
WBGene00001441
WBGene00001444
WBGene00001445
WBGene00001446
WBGene00001447
WBGene00001448
WBGene00001452
WBGene00001453
WBGene00001454
WBGene00001455
WBGene00001459
WBGene00001460
WBGene00001461
WBGene00001462
WBGene00001464
WBGene00001470
WBGene00001476
WBGene00001481
WBGene00001489
WBGene00001491
WBGene00001505
WBGene00001509
WBGene00001513
WBGene00001516
WBGene00001520
WBGene00001559
WBGene00001577
WBGene00001578
WBGene00001584
WBGene00001585
WBGene00001591
WBGene00001595
WBGene00001607
WBGene00001628
WBGene00001629
WBGene00001632
WBGene00001647
WBGene00001662
WBGene00001669
WBGene00001678
WBGene00001680
WBGene00001694
WBGene00001699
WBGene00001713
WBGene00001740
WBGene00001746
WBGene00001752
WBGene00001755
WBGene00001776
WBGene00001791
WBGene00001793
WBGene00001808
WBGene00001813
WBGene00001823
WBGene00001824
WBGene00001836
WBGene00001837
WBGene00001844
WBGene00001975
WBGene00001978
WBGene00001980
WBGene00001986
WBGene00001995
WBGene00002002
WBGene00002003
WBGene00002012
WBGene00002016
WBGene00002018
WBGene00002023
WBGene00002024
WBGene00002039
WBGene00002059
WBGene00002060
WBGene00002064
WBGene00002072
WBGene00002073
WBGene00002097
WBGene00002101
WBGene00002109
WBGene00002110
WBGene00002123
WBGene00002135
WBGene00002147
WBGene00002148
WBGene00002189
WBGene00002190
WBGene00002192
WBGene00002198
WBGene00002203
WBGene00002213
WBGene00002225
WBGene00002229
WBGene00002240
WBGene00002241
WBGene00002245
WBGene00002253
WBGene00002254
WBGene00002255
WBGene00002259
WBGene00002261
WBGene00002268
WBGene00002276
WBGene00002363
WBGene00002694
WBGene00002696
WBGene00002981
WBGene00002982
WBGene00002985
WBGene00002986
WBGene00002991
WBGene00002996
WBGene00002998
WBGene00003000
WBGene00003007
WBGene00003010
WBGene00003019
WBGene00003026
WBGene00003041
WBGene00003043
WBGene00003047
WBGene00003048
WBGene00003055
WBGene00003056
WBGene00003062
WBGene00003066
WBGene00003076
WBGene00003079
WBGene00003087
WBGene00003092
WBGene00003144
WBGene00003149
WBGene00003158
WBGene00003161
WBGene00003162
WBGene00003163
WBGene00003164
WBGene00003172
WBGene00003175
WBGene00003182
WBGene00003184
WBGene00003185
WBGene00003196
WBGene00003210
WBGene00003221
WBGene00003224
WBGene00003225
WBGene00003230
WBGene00003239
WBGene00003243
WBGene00003253
WBGene00003368
WBGene00003369
WBGene00003371
WBGene00003373
WBGene00003375
WBGene00003389
WBGene00003401
WBGene00003402
WBGene00003415
WBGene00003423
WBGene00003431
WBGene00003464
WBGene00003473
WBGene00003477
WBGene00003478
WBGene00003509
WBGene00003511
WBGene00003518
WBGene00003561
WBGene00003567
WBGene00003568
WBGene00003577
WBGene00003581
WBGene00003582
WBGene00003587
WBGene00003594
WBGene00003602
WBGene00003607
WBGene00003610
WBGene00003617
WBGene00003618
WBGene00003620
WBGene00003624
WBGene00003627
WBGene00003630
WBGene00003638
WBGene00003647
WBGene00003652
WBGene00003668
WBGene00003688
WBGene00003690
WBGene00003697
WBGene00003707
WBGene00003710
WBGene00003712
WBGene00003720
WBGene00003724
WBGene00003733
WBGene00003739
WBGene00003741
WBGene00003743
WBGene00003744
WBGene00003745
WBGene00003747
WBGene00003750
WBGene00003752
WBGene00003753
WBGene00003758
WBGene00003762
WBGene00003763
WBGene00003769
WBGene00003771
WBGene00003776
WBGene00003787
WBGene00003788
WBGene00003790
WBGene00003792
WBGene00003805
WBGene00003806
WBGene00003826
WBGene00003828
WBGene00003836
WBGene00003843
WBGene00003865
WBGene00003870
WBGene00003893
WBGene00003905
WBGene00003911
WBGene00003921
WBGene00003922
WBGene00003923
WBGene00003924
WBGene00003927
WBGene00003947
WBGene00003950
WBGene00003952
WBGene00003970
WBGene00003975
WBGene00003978
WBGene00003989
WBGene00003990
WBGene00003996
WBGene00004016
WBGene00004029
WBGene00004046
WBGene00004049
WBGene00004056
WBGene00004057
WBGene00004064
WBGene00004078
WBGene00004083
WBGene00004085
WBGene00004087
WBGene00004088
WBGene00004116
WBGene00004121
WBGene00004136
WBGene00004138
WBGene00004151
WBGene00004164
WBGene00004166
WBGene00004172
WBGene00004180
WBGene00004183
WBGene00004194
WBGene00004195
WBGene00004198
WBGene00004201
WBGene00004203
WBGene00004206
WBGene00004207
WBGene00004215
WBGene00004266
WBGene00004268
WBGene00004270
WBGene00004271
WBGene00004273
WBGene00004274
WBGene00004276
WBGene00004277
WBGene00004286
WBGene00004297
WBGene00004304
WBGene00004307
WBGene00004308
WBGene00004311
WBGene00004320
WBGene00004337
WBGene00004340
WBGene00004341
WBGene00004345
WBGene00004355
WBGene00004356
WBGene00004357
WBGene00004363
WBGene00004369
WBGene00004371
WBGene00004375
WBGene00004378
WBGene00004381
WBGene00004386
WBGene00004390
WBGene00004391
WBGene00004397
WBGene00004411
WBGene00004460
WBGene00004467
WBGene00004468
WBGene00004501
WBGene00004504
WBGene00004505
WBGene00004684
WBGene00004727
WBGene00004728
WBGene00004729
WBGene00004739
WBGene00004743
WBGene00004749
WBGene00004752
WBGene00004758
WBGene00004759
WBGene00004766
WBGene00004769
WBGene00004771
WBGene00004773
WBGene00004774
WBGene00004786
WBGene00004788
WBGene00004795
WBGene00004796
WBGene00004822
WBGene00004825
WBGene00004826
WBGene00004829
WBGene00004831
WBGene00004876
WBGene00004880
WBGene00004881
WBGene00004882
WBGene00004884
WBGene00004891
WBGene00004892
WBGene00004895
WBGene00004896
WBGene00004900
WBGene00004916
WBGene00004918
WBGene00004919
WBGene00004920
WBGene00004923
WBGene00004924
WBGene00004931
WBGene00004933
WBGene00004953
WBGene00004958
WBGene00004975
WBGene00004989
WBGene00004999
WBGene00005001
WBGene00005006
WBGene00005020
WBGene00005026
WBGene00005647
WBGene00005648
WBGene00005655
WBGene00005833
WBGene00006059
WBGene00006061
WBGene00006062
WBGene00006063
WBGene00006306
WBGene00006331
WBGene00006371
WBGene00006372
WBGene00006376
WBGene00006381
WBGene00006392
WBGene00006393
WBGene00006396
WBGene00006405
WBGene00006407
WBGene00006410
WBGene00006415
WBGene00006429
WBGene00006432
WBGene00006442
WBGene00006444
WBGene00006447
WBGene00006450
WBGene00006452
WBGene00006460
WBGene00006462
WBGene00006465
WBGene00006467
WBGene00006474
WBGene00006478
WBGene00006479
WBGene00006481
WBGene00006483
WBGene00006491
WBGene00006494
WBGene00006503
WBGene00006508
WBGene00006510
WBGene00006512
WBGene00006519
WBGene00006520
WBGene00006524
WBGene00006538
WBGene00006566
WBGene00006567
WBGene00006572
WBGene00006573
WBGene00006574
WBGene00006580
WBGene00006586
WBGene00006592
WBGene00006593
WBGene00006605
WBGene00006607
WBGene00006608
WBGene00006627
WBGene00006635
WBGene00006638
WBGene00006648
WBGene00006649
WBGene00006697
WBGene00006701
WBGene00006702
WBGene00006703
WBGene00006708
WBGene00006709
WBGene00006711
WBGene00006715
WBGene00006721
WBGene00006723
WBGene00006724
WBGene00006730
WBGene00006738
WBGene00006745
WBGene00006749
WBGene00006751
WBGene00006755
WBGene00006757
WBGene00006770
WBGene00006781
WBGene00006791
WBGene00006802
WBGene00006805
WBGene00006810
WBGene00006816
WBGene00006817
WBGene00006819
WBGene00006820
WBGene00006826
WBGene00006833
WBGene00006861
WBGene00006869
WBGene00006874
WBGene00006875
WBGene00006887
WBGene00006916
WBGene00006922
WBGene00006936
WBGene00006945
WBGene00006946
WBGene00006951
WBGene00006956
WBGene00006957
WBGene00006958
WBGene00006963
WBGene00006974
WBGene00006979
WBGene00006982
WBGene00006986
WBGene00006999
WBGene00007007
WBGene00007010
WBGene00007015
WBGene00007018
WBGene00007026
WBGene00007044
WBGene00007045
WBGene00007056
WBGene00007059
WBGene00007072
WBGene00007089
WBGene00007090
WBGene00007093
WBGene00007097
WBGene00007099
WBGene00007102
WBGene00007103
WBGene00007116
WBGene00007118
WBGene00007122
WBGene00007129
WBGene00007130
WBGene00007135
WBGene00007137
WBGene00007139
WBGene00007142
WBGene00007144
WBGene00007145
WBGene00007175
WBGene00007192
WBGene00007193
WBGene00007200
WBGene00007207
WBGene00007216
WBGene00007226
WBGene00007254
WBGene00007261
WBGene00007270
WBGene00007274
WBGene00007296
WBGene00007297
WBGene00007301
WBGene00007303
WBGene00007312
WBGene00007316
WBGene00007317
WBGene00007320
WBGene00007332
WBGene00007333
WBGene00007348
WBGene00007363
WBGene00007390
WBGene00007395
WBGene00007400
WBGene00007409
WBGene00007429
WBGene00007430
WBGene00007435
WBGene00007443
WBGene00007449
WBGene00007458
WBGene00007460
WBGene00007474
WBGene00007488
WBGene00007492
WBGene00007493
WBGene00007499
WBGene00007506
WBGene00007517
WBGene00007529
WBGene00007541
WBGene00007544
WBGene00007553
WBGene00007556
WBGene00007558
WBGene00007561
WBGene00007573
WBGene00007574
WBGene00007576
WBGene00007579
WBGene00007581
WBGene00007605
WBGene00007606
WBGene00007609
WBGene00007616
WBGene00007620
WBGene00007621
WBGene00007625
WBGene00007626
WBGene00007627
WBGene00007628
WBGene00007630
WBGene00007645
WBGene00007647
WBGene00007650
WBGene00007684
WBGene00007689
WBGene00007695
WBGene00007698
WBGene00007707
WBGene00007709
WBGene00007711
WBGene00007712
WBGene00007718
WBGene00007730
WBGene00007743
WBGene00007749
WBGene00007753
WBGene00007756
WBGene00007760
WBGene00007761
WBGene00007772
WBGene00007786
WBGene00007787
WBGene00007797
WBGene00007819
WBGene00007825
WBGene00007826
WBGene00007846
WBGene00007855
WBGene00007881
WBGene00007882
WBGene00007883
WBGene00007886
WBGene00007892
WBGene00007898
WBGene00007904
WBGene00007912
WBGene00007923
WBGene00007927
WBGene00007941
WBGene00007942
WBGene00007955
WBGene00007958
WBGene00007959
WBGene00007974
WBGene00007976
WBGene00007978
WBGene00007979
WBGene00007980
WBGene00007982
WBGene00007984
WBGene00007993
WBGene00008000
WBGene00008019
WBGene00008035
WBGene00008089
WBGene00008107
WBGene00008110
WBGene00008131
WBGene00008132
WBGene00008136
WBGene00008147
WBGene00008165
WBGene00008167
WBGene00008169
WBGene00008191
WBGene00008199
WBGene00008211
WBGene00008215
WBGene00008218
WBGene00008226
WBGene00008227
WBGene00008255
WBGene00008262
WBGene00008281
WBGene00008298
WBGene00008318
WBGene00008330
WBGene00008331
WBGene00008338
WBGene00008339
WBGene00008343
WBGene00008344
WBGene00008356
WBGene00008361
WBGene00008366
WBGene00008369
WBGene00008372
WBGene00008375
WBGene00008386
WBGene00008398
WBGene00008412
WBGene00008413
WBGene00008415
WBGene00008417
WBGene00008420
WBGene00008424
WBGene00008431
WBGene00008446
WBGene00008452
WBGene00008454
WBGene00008455
WBGene00008480
WBGene00008492
WBGene00008494
WBGene00008502
WBGene00008504
WBGene00008521
WBGene00008533
WBGene00008538
WBGene00008546
WBGene00008548
WBGene00008553
WBGene00008555
WBGene00008569
WBGene00008571
WBGene00008572
WBGene00008576
WBGene00008580
WBGene00008586
WBGene00008601
WBGene00008602
WBGene00008606
WBGene00008624
WBGene00008641
WBGene00008644
WBGene00008645
WBGene00008667
WBGene00008684
WBGene00008685
WBGene00008686
WBGene00008694
WBGene00008729
WBGene00008745
WBGene00008748
WBGene00008762
WBGene00008765
WBGene00008766
WBGene00008767
WBGene00008768
WBGene00008806
WBGene00008820
WBGene00008831
WBGene00008850
WBGene00008859
WBGene00008860
WBGene00008865
WBGene00008880
WBGene00008882
WBGene00008914
WBGene00008915
WBGene00008917
WBGene00008918
WBGene00008925
WBGene00008927
WBGene00008930
WBGene00008932
WBGene00008939
WBGene00008951
WBGene00008969
WBGene00008971
WBGene00008973
WBGene00008974
WBGene00008975
WBGene00008980
WBGene00008986
WBGene00009006
WBGene00009049
WBGene00009052
WBGene00009056
WBGene00009061
WBGene00009065
WBGene00009092
WBGene00009097
WBGene00009100
WBGene00009103
WBGene00009106
WBGene00009131
WBGene00009139
WBGene00009140
WBGene00009142
WBGene00009165
WBGene00009172
WBGene00009174
WBGene00009180
WBGene00009187
WBGene00009215
WBGene00009219
WBGene00009224
WBGene00009245
WBGene00009256
WBGene00009262
WBGene00009274
WBGene00009286
WBGene00009293
WBGene00009319
WBGene00009320
WBGene00009337
WBGene00009346
WBGene00009352
WBGene00009353
WBGene00009364
WBGene00009369
WBGene00009377
WBGene00009404
WBGene00009430
WBGene00009432
WBGene00009434
WBGene00009443
WBGene00009445
WBGene00009450
WBGene00009451
WBGene00009452
WBGene00009477
[truncated: 137,776 more rows]
